# Supplementary material for: Resolving Relationships of Bolbitis sinensis Species Complex Using RAD Sequencing
Source: Preprints.org preprint supplement (doi:10.20944/preprints202406.0083.v1), 2024-06-03
Supplement: Supplementary file 1 [file supplementary]

## Sheet: S1-Sample info
Table S1. Detailed sample information of the geographical origins and venation pattern of Bolbitis sinensis species complex
sample	Location	population	species	spe_loc	character	voucher number
110903-1	Bubeng, Mengla, Yunnan, China	BB	Mul	Mul_BB	connected
110903-10	Bubeng, Mengla, Yunnan, China	BB	Mul	Mul_BB	connected	F. G. Wang et L. Y. Nie 5594-10
110903-11	Bubeng, Mengla, Yunnan, China	BB	Mul	Mul_BB	connected	F. G. Wang et L. Y. Nie 5594-11
110903-2	Bubeng, Mengla, Yunnan, China	BB	Mul	Mul_BB	connected
110903-3	Bubeng, Mengla, Yunnan, China	BB	Mul	Mul_BB	connected
110903-4	Bubeng, Mengla, Yunnan, China	BB	Mul	Mul_BB	connected
110903-5	Bubeng, Mengla, Yunnan, China	BB	Mul	Mul_BB	connected
110903-6	Bubeng, Mengla, Yunnan, China	BB	Mul	Mul_BB	connected
110903-7	Bubeng, Mengla, Yunnan, China	BB	Mul	Mul_BB	connected
110903-8	Bubeng, Mengla, Yunnan, China	BB	Mul	Mul_BB	connected
110903-9	Bubeng, Mengla, Yunnan, China	BB	Mul	Mul_BB	connected	F. G. Wang et L. Y. Nie 5594-9
110903-a	Bubeng, Mengla, Yunnan, China	BB	Mul	Mul_BB	connected	F. G. Wang et L. Y. Nie 5594-a
110905-1	Bubeng, Mengla, Yunnan, China	BB	Sin	Sin_BB	simple	F. G. Wang et L. Y. Nie 5593-1
110905-2	Bubeng, Mengla, Yunnan, China	BB	Sin	Sin_BB	simple
110905-3	Bubeng, Mengla, Yunnan, China	BB	Sin	Sin_BB	simple
110905-4	Bubeng, Mengla, Yunnan, China	BB	Sin	Sin_BB	simple
110905-5	Bubeng, Mengla, Yunnan, China	BB	Sin	Sin_BB	simple
110905-6	Bubeng, Mengla, Yunnan, China	BB	Sin	Sin_BB	simple
110905-7	Bubeng, Mengla, Yunnan, China	BB	Sin	Sin_BB	simple	F. G. Wang et L. Y. Nie 5593-7
110905-8	Bubeng, Mengla, Yunnan, China	BB	Sin	Sin_BB	simple	F. G. Wang et L. Y. Nie 5593-8
110905-9	Bubeng, Mengla, Yunnan, China	BB	Sin	Sin_BB	simple
110905-a	Bubeng, Mengla, Yunnan, China	BB	Sin	Sin_BB	simple	F. G. Wang et L. Y. Nie 5593-a
111004-1	Nangongshan, Mengla, Yunnan, China	NG	Mul	Mul_NG	connected	F. G. Wang et L. Y. Nie 5598-1
111004-3	Nangongshan, Mengla, Yunnan, China	NG	Mul	Mul_NG	middle	F. G. Wang et L. Y. Nie 5598-3
111004-4	Nangongshan, Mengla, Yunnan, China	NG	Mul	Mul_NG	middle	F. G. Wang et L. Y. Nie 5598-4
111005-1	Nangongshan, Mengla, Yunnan, China	NG	Sin	Sin_NG	simple	F. G. Wang et L. Y. Nie 5599-1
111005-2	Nangongshan, Mengla, Yunnan, China	NG	Sin	Sin_NG	simple	F. G. Wang et L. Y. Nie 5599-2
111005-3	Nangongshan, Mengla, Yunnan, China	NG	Sin	Sin_NG	simple
111005-4	Nangongshan, Mengla, Yunnan, China	NG	Sin	Sin_NG	simple
111005-5	Nangongshan, Mengla, Yunnan, China	NG	Sin	Sin_NG	simple
111005-6	Nangongshan, Mengla, Yunnan, China	NG	Sin	Sin_NG	simple
111006-3	Nangongshan, Mengla, Yunnan, China	NG	Lon	Lon_NG	simple
111006-4	Nangongshan, Mengla, Yunnan, China	NG	Lon	Lon_NG	simple	F. G. Wang et L. Y. Nie 5604-4
111007-1	Nangongshan, Mengla, Yunnan, China	NG	Sp	Sp_NG	connected
111007-2	Nangongshan, Mengla, Yunnan, China	NG	Sp	Sp_NG	connected
111101-1	Nanping, Mengla, Yunnan, China	NP	Lon	Lon_NP	simple	F. G. Wang et L. Y. Nie 5605-1
111101-2	Nanping, Mengla, Yunnan, China	NP	Lon	Lon_NP	simple	F. G. Wang et L. Y. Nie 5605-2
111102-1	Nanping, Mengla, Yunnan, China	NP	Mul	Mul_NP	middle	F. G. Wang et L. Y. Nie 5606-1
111102-2	Nanping, Mengla, Yunnan, China	NP	Mul	Mul_NP	middle	F. G. Wang et L. Y. Nie 5606-2
111104-1	Nanping, Mengla, Yunnan, China	NP	Sin	Sin_NP	simple
111104-2	Nanping, Mengla, Yunnan, China	NP	Sin	Sin_NP	simple
111104-3	Nanping, Mengla, Yunnan, China	NP	Sin	Sin_NP	simple
111201-1	Menglun, Mengla, Yunnan, China	ML	Mul	Mul_ML	middle	F. G. Wang et L. Y. Nie 5607-1
111201-2	Menglun, Mengla, Yunnan, China	ML	Mul	Mul_ML	connected	F. G. Wang et L. Y. Nie 5607-2
111201-3	Menglun, Mengla, Yunnan, China	ML	Mul	Mul_ML	connected	F. G. Wang et L. Y. Nie 5607-3
111201-4	Menglun, Mengla, Yunnan, China	ML	Mul	Mul_ML	connected	F. G. Wang et L. Y. Nie 5607-4
111201-5	Menglun, Mengla, Yunnan, China	ML	Mul	Mul_ML	middle	F. G. Wang et L. Y. Nie 5607-5
111203-1	Menglun, Mengla, Yunnan, China	ML	Sin	Sin_ML	simple	F. G. Wang et L. Y. Nie 5609-1
111203-2	Menglun, Mengla, Yunnan, China	ML	Sin	Sin_ML	simple	F. G. Wang et L. Y. Nie 5609-2
111203-3	Menglun, Mengla, Yunnan, China	ML	Sin	Sin_ML	simple	F. G. Wang et L. Y. Nie 5609-3
111401-1	Puwen, Jinghong, Yunnan, China	PT	Sin	Sin_PT	simple	F. G. Wang et L. Y. Nie 5610-1
111401-2	Puwen, Jinghong, Yunnan, China	PT	Sin	Sin_PT	simple
111401-3	Puwen, Jinghong, Yunnan, China	PT	Sin	Sin_PT	simple
111401-4	Puwen, Jinghong, Yunnan, China	PT	Sin	Sin_PT	simple
111403-1	Puwen, Jinghong, Yunnan, China	PT	Mul	Mul_PT	middle	F. G. Wang et L. Y. Nie 5612-1
111403-2	Puwen, Jinghong, Yunnan, China	PT	Mul	Mul_PT	middle	F. G. Wang et L. Y. Nie 5612-2
111403-3	Puwen, Jinghong, Yunnan, China	PT	Mul	Mul_PT	middle
111403-4	Puwen, Jinghong, Yunnan, China	PT	Mul	Mul_PT	middle
111403-5	Puwen, Jinghong, Yunnan, China	PT	Mul	Mul_PT	middle
111403-6	Puwen, Jinghong, Yunnan, China	PT	Mul	Mul_PT	middle
111403-7	Puwen, Jinghong, Yunnan, China	PT	Mul	Mul_PT	middle
111403-8	Puwen, Jinghong, Yunnan, China	PT	Mul	Mul_PT	middle
111403-9	Puwen, Jinghong, Yunnan, China	PT	Mul	Mul_PT	middle	F. G. Wang et L. Y. Nie 5612-9
111404-1	Puwen, Jinghong, Yunnan, China	PT	Sp	Sp_PT	connected
111404-2	Puwen, Jinghong, Yunnan, China	PT	Sp	Sp_PT	connected

## Sheet: S2-clean data info
Table S2. RAD-seq clean data information after filtering
file	format	type	num_seqs	sum_len (bp)	min_len	avg_len	max_len
110903-10.1.fq.gz	FASTQ	DNA	37503753	5063006655	135	135	135
110903-10.2.fq.gz	FASTQ	DNA	37503753	5063006655	135	135	135
110903-11.1.fq.gz	FASTQ	DNA	44520145	6010219575	135	135	135
110903-11.2.fq.gz	FASTQ	DNA	44520145	6010219575	135	135	135
110903-1.1.fq.gz	FASTQ	DNA	37440688	5054492880	135	135	135
110903-1.2.fq.gz	FASTQ	DNA	37440688	5054492880	135	135	135
110903-2.1.fq.gz	FASTQ	DNA	46948233	6338011455	135	135	135
110903-2.2.fq.gz	FASTQ	DNA	46948233	6338011455	135	135	135
110903-3.1.fq.gz	FASTQ	DNA	65454590	8836369650	135	135	135
110903-3.2.fq.gz	FASTQ	DNA	65454590	8836369650	135	135	135
110903-4.1.fq.gz	FASTQ	DNA	36698841	4954343535	135	135	135
110903-4.2.fq.gz	FASTQ	DNA	36698841	4954343535	135	135	135
110903-5.1.fq.gz	FASTQ	DNA	50412347	6805666845	135	135	135
110903-5.2.fq.gz	FASTQ	DNA	50412347	6805666845	135	135	135
110903-6.1.fq.gz	FASTQ	DNA	52049308	7026656580	135	135	135
110903-6.2.fq.gz	FASTQ	DNA	52049308	7026656580	135	135	135
110903-7.1.fq.gz	FASTQ	DNA	51255399	6919478865	135	135	135
110903-7.2.fq.gz	FASTQ	DNA	51255399	6919478865	135	135	135
110903-8.1.fq.gz	FASTQ	DNA	37337799	5040602865	135	135	135
110903-8.2.fq.gz	FASTQ	DNA	37337799	5040602865	135	135	135
110903-9.1.fq.gz	FASTQ	DNA	37785725	5101072875	135	135	135
110903-9.2.fq.gz	FASTQ	DNA	37785725	5101072875	135	135	135
110903-a.1.fq.gz	FASTQ	DNA	47622202	6428997270	135	135	135
110903-a.2.fq.gz	FASTQ	DNA	47622202	6428997270	135	135	135
110905-1.1.fq.gz	FASTQ	DNA	69561942	9390862170	135	135	135
110905-1.2.fq.gz	FASTQ	DNA	69561942	9390862170	135	135	135
110905-2.1.fq.gz	FASTQ	DNA	35784801	4830948135	135	135	135
110905-2.2.fq.gz	FASTQ	DNA	35784801	4830948135	135	135	135
110905-3.1.fq.gz	FASTQ	DNA	47234104	6376604040	135	135	135
110905-3.2.fq.gz	FASTQ	DNA	47234104	6376604040	135	135	135
110905-4.1.fq.gz	FASTQ	DNA	48016337	6482205495	135	135	135
110905-4.2.fq.gz	FASTQ	DNA	48016337	6482205495	135	135	135
110905-5.1.fq.gz	FASTQ	DNA	36703643	4954991805	135	135	135
110905-5.2.fq.gz	FASTQ	DNA	36703643	4954991805	135	135	135
110905-6.1.fq.gz	FASTQ	DNA	41810288	5644388880	135	135	135
110905-6.2.fq.gz	FASTQ	DNA	41810288	5644388880	135	135	135
110905-7.1.fq.gz	FASTQ	DNA	42983323	5802748605	135	135	135
110905-7.2.fq.gz	FASTQ	DNA	42983323	5802748605	135	135	135
110905-8.1.fq.gz	FASTQ	DNA	33721108	4552349580	135	135	135
110905-8.2.fq.gz	FASTQ	DNA	33721108	4552349580	135	135	135
110905-9.1.fq.gz	FASTQ	DNA	64086470	8651673450	135	135	135
110905-9.2.fq.gz	FASTQ	DNA	64086470	8651673450	135	135	135
110905-a.1.fq.gz	FASTQ	DNA	37064481	5003704935	135	135	135
110905-a.2.fq.gz	FASTQ	DNA	37064481	5003704935	135	135	135
111004-1.1.fq.gz	FASTQ	DNA	81525338	11005920630	135	135	135
111004-1.2.fq.gz	FASTQ	DNA	81525338	11005920630	135	135	135
111004-3.1.fq.gz	FASTQ	DNA	66509601	8978796135	135	135	135
111004-3.2.fq.gz	FASTQ	DNA	66509601	8978796135	135	135	135
111004-4.1.fq.gz	FASTQ	DNA	60888536	8219952360	135	135	135
111004-4.2.fq.gz	FASTQ	DNA	60888536	8219952360	135	135	135
111005-1.1.fq.gz	FASTQ	DNA	47173419	6368411565	135	135	135
111005-1.2.fq.gz	FASTQ	DNA	47173419	6368411565	135	135	135
111005-2.1.fq.gz	FASTQ	DNA	63367508	8554613580	135	135	135
111005-2.2.fq.gz	FASTQ	DNA	63367508	8554613580	135	135	135
111005-3.1.fq.gz	FASTQ	DNA	51507447	6953505345	135	135	135
111005-3.2.fq.gz	FASTQ	DNA	51507447	6953505345	135	135	135
111005-4.1.fq.gz	FASTQ	DNA	54049695	7296708825	135	135	135
111005-4.2.fq.gz	FASTQ	DNA	54049695	7296708825	135	135	135
111005-5.1.fq.gz	FASTQ	DNA	55853383	7540206705	135	135	135
111005-5.2.fq.gz	FASTQ	DNA	55853383	7540206705	135	135	135
111005-6.1.fq.gz	FASTQ	DNA	51515041	6954530535	135	135	135
111005-6.2.fq.gz	FASTQ	DNA	51515041	6954530535	135	135	135
111006-3.1.fq.gz	FASTQ	DNA	40823665	5511194775	135	135	135
111006-3.2.fq.gz	FASTQ	DNA	40823665	5511194775	135	135	135
111006-4.1.fq.gz	FASTQ	DNA	46407000	6264945000	135	135	135
111006-4.2.fq.gz	FASTQ	DNA	46407000	6264945000	135	135	135
111007-1.1.fq.gz	FASTQ	DNA	72511563	9789061005	135	135	135
111007-1.2.fq.gz	FASTQ	DNA	72511563	9789061005	135	135	135
111007-2.1.fq.gz	FASTQ	DNA	48735737	6579324495	135	135	135
111007-2.2.fq.gz	FASTQ	DNA	48735737	6579324495	135	135	135
111101-1.1.fq.gz	FASTQ	DNA	36978508	4992098580	135	135	135
111101-1.2.fq.gz	FASTQ	DNA	36978508	4992098580	135	135	135
111101-2.1.fq.gz	FASTQ	DNA	106013682	14311847070	135	135	135
111101-2.2.fq.gz	FASTQ	DNA	106013682	14311847070	135	135	135
111102-1.1.fq.gz	FASTQ	DNA	42014081	5671900935	135	135	135
111102-1.2.fq.gz	FASTQ	DNA	42014081	5671900935	135	135	135
111102-2.1.fq.gz	FASTQ	DNA	44685787	6032581245	135	135	135
111102-2.2.fq.gz	FASTQ	DNA	44685787	6032581245	135	135	135
111104-1.1.fq.gz	FASTQ	DNA	53722851	7252584885	135	135	135
111104-1.2.fq.gz	FASTQ	DNA	53722851	7252584885	135	135	135
111104-2.1.fq.gz	FASTQ	DNA	37296574	5035037490	135	135	135
111104-2.2.fq.gz	FASTQ	DNA	37296574	5035037490	135	135	135
111104-3.1.fq.gz	FASTQ	DNA	56670060	7650458100	135	135	135
111104-3.2.fq.gz	FASTQ	DNA	56670060	7650458100	135	135	135
111201-1.1.fq.gz	FASTQ	DNA	55107130	7439462550	135	135	135
111201-1.2.fq.gz	FASTQ	DNA	55107130	7439462550	135	135	135
111201-2.1.fq.gz	FASTQ	DNA	74076364	10000309140	135	135	135
111201-2.2.fq.gz	FASTQ	DNA	74076364	10000309140	135	135	135
111201-3.1.fq.gz	FASTQ	DNA	43368278	5854717530	135	135	135
111201-3.2.fq.gz	FASTQ	DNA	43368278	5854717530	135	135	135
111201-4.1.fq.gz	FASTQ	DNA	60083492	8111271420	135	135	135
111201-4.2.fq.gz	FASTQ	DNA	60083492	8111271420	135	135	135
111201-5.1.fq.gz	FASTQ	DNA	57321369	7738384815	135	135	135
111201-5.2.fq.gz	FASTQ	DNA	57321369	7738384815	135	135	135
111203-1.1.fq.gz	FASTQ	DNA	40228056	5430787560	135	135	135
111203-1.2.fq.gz	FASTQ	DNA	40228056	5430787560	135	135	135
111203-2.1.fq.gz	FASTQ	DNA	49759693	6717558555	135	135	135
111203-2.2.fq.gz	FASTQ	DNA	49759693	6717558555	135	135	135
111203-3.1.fq.gz	FASTQ	DNA	51250938	6918876630	135	135	135
111203-3.2.fq.gz	FASTQ	DNA	51250938	6918876630	135	135	135
111401-1.1.fq.gz	FASTQ	DNA	41407130	5589962550	135	135	135
111401-1.2.fq.gz	FASTQ	DNA	41407130	5589962550	135	135	135
111401-2.1.fq.gz	FASTQ	DNA	34872940	4707846900	135	135	135
111401-2.2.fq.gz	FASTQ	DNA	34872940	4707846900	135	135	135
111401-3.1.fq.gz	FASTQ	DNA	44527068	6011154180	135	135	135
111401-3.2.fq.gz	FASTQ	DNA	44527068	6011154180	135	135	135
111401-4.1.fq.gz	FASTQ	DNA	52602903	7101391905	135	135	135
111401-4.2.fq.gz	FASTQ	DNA	52602903	7101391905	135	135	135
111403-1.1.fq.gz	FASTQ	DNA	44748514	6041049390	135	135	135
111403-1.2.fq.gz	FASTQ	DNA	44748514	6041049390	135	135	135
111403-2.1.fq.gz	FASTQ	DNA	72608557	9802155195	135	135	135
111403-2.2.fq.gz	FASTQ	DNA	72608557	9802155195	135	135	135
111403-3.1.fq.gz	FASTQ	DNA	60081989	8111068515	135	135	135
111403-3.2.fq.gz	FASTQ	DNA	60081989	8111068515	135	135	135
111403-4.1.fq.gz	FASTQ	DNA	48751183	6581409705	135	135	135
111403-4.2.fq.gz	FASTQ	DNA	48751183	6581409705	135	135	135
111403-5.1.fq.gz	FASTQ	DNA	34883816	4709315160	135	135	135
111403-5.2.fq.gz	FASTQ	DNA	34883816	4709315160	135	135	135
111403-6.1.fq.gz	FASTQ	DNA	52917302	7143835770	135	135	135
111403-6.2.fq.gz	FASTQ	DNA	52917302	7143835770	135	135	135
111403-7.1.fq.gz	FASTQ	DNA	50087701	6761839635	135	135	135
111403-7.2.fq.gz	FASTQ	DNA	50087701	6761839635	135	135	135
111403-8.1.fq.gz	FASTQ	DNA	44673342	6030901170	135	135	135
111403-8.2.fq.gz	FASTQ	DNA	44673342	6030901170	135	135	135
111403-9.1.fq.gz	FASTQ	DNA	44409436	5995273860	135	135	135
111403-9.2.fq.gz	FASTQ	DNA	44409436	5995273860	135	135	135
111404-1.1.fq.gz	FASTQ	DNA	39404764	5319643140	135	135	135
111404-1.2.fq.gz	FASTQ	DNA	39404764	5319643140	135	135	135
111404-2.1.fq.gz	FASTQ	DNA	51233459	6916516965	135	135	135
111404-2.2.fq.gz	FASTQ	DNA	51233459	6916516965	135	135	135
mean			5.05897e+07	6.82961e+09
sum			6222532194	840041846190

## Sheet: S3-stacks summary
Table S3. Detailed summary statistics of each program in STACKS pipeline
progarm	ustacks					sstacks	gstacks
samples	Final stacks number	Final mean coverage	stdev	max	n_reads	matching loci	n_loci	n_used_fw_reads	mean_cov	mean_cov_ns	n_unpaired_reads	n_pcr_dupl_pairs	pcr_dupl_rate
110903-10	106305	24.77	36.67	622	2590439(6.9%)	60291	88038	99295	1.128	1.526	21294	1046916	0.913
110903-11	147335	22.37	34.79	591	3222933(7.2%)	90737	75083	88562	1.18	1.624	28724	1024338	0.92
110903-1	113821	21.6	33.17	478	2428656(6.5%)	70606	109230	125431	1.148	1.596	34347	1293723	0.912
110903-2	170107	22.42	33.9	518	3760528(8.0%)	101546	127748	147021	1.151	1.589	39389	1672708	0.919
110903-3	290483	20.16	33.16	745	5750471(8.8%)	194462	227768	259787	1.141	1.58	66399	2635710	0.91
110903-4	120002	23.32	34.92	574	2755418(7.5%)	71074	87835	103206	1.175	1.628	31119	1175111	0.919
110903-5	186873	18.91	31.14	689	3478873(6.9%)	126001	146835	164308	1.119	1.511	40153	1554877	0.904
110903-6	205116	21.18	33.37	678	4274341(8.2%)	131429	156733	180735	1.153	1.627	51245	1908449	0.913
110903-7	164024	24.88	38.31	831	4011164(7.8%)	99421	123441	147658	1.196	1.698	48518	1778465	0.923
110903-8	123258	22.34	34.48	461	2714635(7.3%)	76573	93705	109535	1.169	1.643	38061	1173430	0.915
110903-9	122834	22.1	34.36	673	2676674(7.1%)	77652	94130	108684	1.155	1.605	34271	1142419	0.913
110903-a	186002	21.05	32.97	669	3850187(8.1%)	118592	141443	162506	1.149	1.617	52508	1694133	0.912
110905-1	219746	31.55	47.45	1118	6714095(9.7%)	119918	152437	195176	1.28	1.877	87393	2755524	0.934
110905-2	77975	32.72	45.23	633	2484609(6.9%)	36911	50050	64938	1.297	1.859	27238	951438	0.936
110905-3	125056	33.69	46.99	745	4085281(8.6%)	59951	81908	109251	1.334	1.949	53012	1675447	0.939
110905-4	112408	35.05	48.48	709	3823670(8.0%)	53900	72979	98066	1.344	1.943	50092	1554891	0.941
110905-5	100751	31.77	44.65	728	3120007(8.5%)	50033	67884	88412	1.302	1.875	45272	1284061	0.936
110905-6	107470	33.42	47.24	711	3487271(8.3%)	55323	72025	94097	1.306	1.963	49308	1342214	0.934
110905-7	125368	29.34	43.47	929	3584613(8.3%)	69230	87950	110141	1.252	1.852	45586	1444614	0.929
110905-8	138571	22.52	35.2	563	3058209(9.1%)	85666	102723	120124	1.169	1.59	19980	1302223	0.916
110905-9	211089	29.83	45.05	900	6106817(9.5%)	115119	147844	187042	1.265	1.811	86168	2739850	0.936
110905-a	110260	28.31	41.41	649	3046311(8.2%)	60366	76772	96457	1.256	1.802	44176	1269516	0.929
111004-1	481102	20.73	34.6	782	9695122(11.9%)	325965	379127	433690	1.144	1.617	117305	4241302	0.907
111004-3	342199	22.56	36.75	743	7504776(11.3%)	217198	255922	294785	1.152	1.702	88851	2960225	0.909
111004-4	260563	24.25	38.83	905	6163676(10.1%)	163897	196821	239241	1.216	1.825	93489	2741869	0.92
111005-1	169564	29.5	43.21	814	4825838(10.2%)	87485	110027	134829	1.225	1.775	49206	1730869	0.928
111005-2	260256	25.73	40.69	843	6497959(10.3%)	154749	184870	218122	1.18	1.72	67341	2450255	0.918
111005-3	204907	26.41	41.01	986	5262396(10.2%)	118192	145062	174302	1.202	1.771	58086	2023276	0.921
111005-4	181674	29.21	44.02	749	5135490(9.5%)	99778	123749	153354	1.239	1.854	62216	1905856	0.926
111005-5	187869	28.44	43.4	878	5174491(9.3%)	104534	129592	157622	1.216	1.736	64985	1991421	0.927
111005-6	220698	21.9	35.88	615	4713412(9.1%)	143428	167939	192763	1.148	1.677	60724	1930406	0.909
111006-3	212906	18.11	30.47	693	3800439(9.3%)	147958	170065	192262	1.131	1.564	34190	1616399	0.894
111006-4	251237	18.5	31.17	697	4545195(9.8%)	170674	196228	223379	1.138	1.593	44982	1903005	0.895
111007-1	316046	21.23	32.04	682	6593240(9.1%)	215674	251788	293163	1.164	1.568	108250	3499155	0.923
111007-2	145983	20.61	32.84	541	2967401(6.1%)	101240	119210	137275	1.152	1.5	41170	1532147	0.918
111101-1	216711	15.91	26.5	490	3396449(9.2%)	154348	177687	195280	1.099	1.531	36752	1549913	0.888
111101-2	892847	16.48	27.67	798	14377291(13.6%)	661332	744292	835883	1.123	1.526	226393	7334154	0.898
111102-1	159799	25.37	39.3	671	3956391(9.4%)	93471	114801	136947	1.193	1.766	53170	1546044	0.919
111102-2	174606	23.38	36.96	629	3999474(9.0%)	108492	132682	153435	1.156	1.676	47975	1697823	0.917
111104-1	217113	25.27	39.77	879	5330665(9.9%)	129720	157667	189125	1.2	1.769	76300	2160559	0.92
111104-2	126708	26.5	39.71	641	3275155(8.8%)	71338	88384	107798	1.22	1.848	46580	1228130	0.919
111104-3	213223	28.33	43.39	858	5848931(10.3%)	121012	149625	186571	1.247	1.828	83215	2328464	0.926
111201-1	248573	23.63	37.7	770	5709219(10.4%)	154728	187019	223558	1.195	1.738	96634	2551202	0.919
111201-2	333650	24.84	40.52	853	8075230(10.9%)	213642	258151	311725	1.208	1.708	138725	3923170	0.926
111201-3	136634	30.28	43.18	720	3999901(9.2%)	69763	89836	115193	1.282	1.808	58720	1725554	0.937
111201-4	217569	27.76	42.73	775	5853945(9.7%)	125997	156541	195479	1.249	1.78	91521	2694399	0.932
111201-5	207497	27.98	42.52	874	5608399(9.8%)	118426	149004	187879	1.261	1.805	97844	2628692	0.933
111203-1	131616	28.12	41.89	597	3601823(9.0%)	75097	96414	123840	1.284	1.892	55837	1638101	0.93
111203-2	166798	27.7	42.17	635	4494662(9.0%)	97467	122466	156338	1.277	1.845	73982	2092141	0.93
111203-3	156843	29.8	44.93	754	4536472(8.9%)	90470	114562	149083	1.301	1.888	72602	2113393	0.934
111401-1	129898	28.51	42.3	701	3604836(8.7%)	72611	92597	126590	1.367	1.955	48200	1607636	0.927
111401-2	119355	27.1	38.71	865	3155886(9.0%)	74609	91604	121123	1.322	1.918	37046	1627866	0.931
111401-3	176368	29.25	41.75	670	5000190(11.2%)	89957	123824	172109	1.39	1.915	64089	2475389	0.935
111401-4	192006	27.06	41.74	783	5038744(9.6%)	114737	142834	192687	1.349	1.964	78320	2428153	0.926
111403-1	129994	30.66	44.75	715	3860032(8.6%)	68760	91337	118624	1.299	1.781	63706	1779225	0.937
111403-2	274818	28.87	43.77	853	7683509(10.6%)	155506	203954	266071	1.305	1.816	131593	4088935	0.939
111403-3	283552	23.48	37.02	972	6469926(10.8%)	175991	220387	274155	1.244	1.782	126835	3445208	0.926
111403-4	201895	23.96	37.85	737	4732435(9.7%)	126939	158178	199176	1.259	1.808	91811	2547603	0.927
111403-5	123232	25.46	37.84	640	3062426(8.8%)	70187	94484	121387	1.285	1.811	60569	1629189	0.931
111403-6	201705	26.71	41.55	720	5238000(9.9%)	121987	158522	205015	1.293	1.814	102304	2964073	0.935
111403-7	180562	26.2	41.03	857	4613495(9.2%)	114195	142631	184101	1.291	1.855	87433	2630489	0.935
111403-8	150946	27.25	41.89	883	4013825(9.0%)	92800	119156	155585	1.306	1.84	73608	2357901	0.938
111403-9	149546	27.93	41.96	769	4043500(9.1%)	86624	113772	153570	1.35	1.869	82180	2506005	0.942
111404-1	200397	17.45	26.64	619	3423181(8.7%)	140943	163893	193967	1.183	1.607	54072	2101915	0.916
111404-2	242772	16.46	26.29	442	3912613(7.6%)	182461	209242	247750	1.184	1.617	75488	2698746	0.916
average	182965	25.4133	38.68	724.818	4606006(8.8%)	110868	137570	163006	1.19931	1.70477	53858.5	1.85561e+06	0.919943

## Sheet: S4-SNPs dataset summary
Table S4. Number of variant sites remained by population program, sites remained after data conversion using vcf2phylip scripts, number of parsimony-informative sites, singleton sites, constant sites identified by iqtree, and only informative sites used for final phylogeny for each data matrix.
datasets	variant sites remained	min4 sites	parsimony-informative sites	singleton sites	constant sites	varsites with ASC in iqtree
p1-r0.30	35804	30654	17953	8958	3743	26955
p1-r0.40	23106	20346	11508	6015	2823	17475
p1-r0.50	15205	15205	7558	5219	2428	12774
p1-r0.60	9467	9467	4658	3049	1760	7771
p1-r0.70	5897	5897	2576	2133	1188	4671
p1-r0.80	3463	3463	1383	1286	794	2688
p1-r0.90	1513	1513	573	556	384	1143
p2-r0.30	15322	15322	12200	2349	773	14600
p2-r0.40	9165	9165	7336	1374	455	8669
p2-r0.50	5621	5621	4437	882	302	5307
p2-r0.60	3200	3200	2563	460	177	3039
p2-r0.70	1753	1753	1363	295	95	1660
p2-r0.80	851	851	681	124	46	812
p2-r0.90	340	340	292	41	7	321
p3-r0.30	9712	9712	8357	1072	283	9404
p3-r0.40	5856	5856	5086	612	158	5712
p3-r0.50	3485	3485	3055	334	96	3387
p3-r0.60	1979	1979	1757	182	40	1927
p3-r0.70	1031	1031	928	88	15	1010
p3-r0.80	527	527	479	39	9	517
p3-r0.90	214	214	204	5	5	213
p4-r0.30	6246	6246	5616	506	124	6122
p4-r0.40	3769	3769	3485	221	63	3728
p4-r0.50	2233	2233	2073	130	30	2207
p4-r0.60	1195	1195	1115	62	18	1187
p4-r0.70	640	640	602	33	5	631
p4-r0.80	343	343	326	16	1	340
p4-r0.90	151	151	145	4	2	151
p5-r0.30	3537	3537	3293	200	44	3513
p5-r0.40	2140	2140	2032	90	18	2118
p5-r0.50	1308	1308	1255	45	8	1298
p5-r0.60	655	655	631	19	5	651
p5-r0.70	358	358	350	5	3	357
p5-r0.80	196	196	194	2	0	195
p5-r0.90	89	89	88	1	0	89

## Sheet: S5-RF distances matrix
Table S5. the Robinson-Foulds (RF) distances between a set of trees using the multiRF() function in R package phytools
dataset	p1-r0.30	p1-r0.40	p1-r0.50	p1-r0.60	p1-r0.70	p1-r0.80	p1-r0.90	p2-r0.30	p2-r0.40	p2-r0.50	p2-r0.60	p2-r0.70	p2-r0.80	p2-r0.90	p3-r0.30	p3-r0.40	p3-r0.50	p3-r0.60	p3-r0.70	p3-r0.80	p3-r0.90	p4-r0.30	p4-r0.40	p4-r0.50	p4-r0.60	p4-r0.70	p4-r0.80	p4-r0.90	p5-r0.30	p5-r0.40	p5-r0.50	p5-r0.60	p5-r0.70	p5-r0.80	p5-r0.90
p1-r0.30	0	96	96	96	86	104	108	74	96	104	98	104	100	104	80	84	108	102	106	106	102	102	110	96	110	114	104	84	96	104	102	106	106	106	100
p1-r0.40	96	0	98	80	102	104	102	92	88	96	92	102	114	112	96	112	96	86	110	118	110	102	96	100	104	104	114	108	90	92	90	108	104	106	114
p1-r0.50	96	98	0	96	102	98	102	102	96	100	96	98	102	106	106	96	108	104	108	110	102	92	84	98	94	96	104	110	98	102	98	94	96	98	112
p1-r0.60	96	80	96	0	100	96	106	98	82	86	80	98	110	108	92	110	98	86	110	114	106	92	94	96	94	100	114	106	92	94	92	102	98	98	110
p1-r0.70	86	102	102	100	0	104	110	94	108	110	112	96	100	100	88	92	108	106	88	102	98	104	94	112	104	102	98	102	104	112	106	106	104	102	110
p1-r0.80	104	104	98	96	104	0	104	104	100	104	108	90	90	98	106	102	98	96	110	104	96	94	102	106	86	96	108	110	106	100	102	96	94	94	116
p1-r0.90	108	102	102	106	110	104	0	114	106	108	106	102	98	90	110	104	108	104	102	102	110	104	102	100	96	96	98	110	104	108	112	100	100	104	112
p2-r0.30	74	92	102	98	94	104	114	0	92	104	96	110	108	108	80	86	106	104	106	108	100	100	104	106	110	112	106	92	92	100	100	114	110	100	102
p2-r0.40	96	88	96	82	108	100	106	92	0	98	88	106	106	112	86	94	88	100	114	114	108	92	90	96	96	106	106	102	88	88	84	108	98	102	108
p2-r0.50	104	96	100	86	110	104	108	104	98	0	86	96	108	104	106	110	84	76	108	110	110	102	94	84	100	98	106	106	96	100	96	106	104	100	110
p2-r0.60	98	92	96	80	112	108	106	96	88	86	0	100	110	106	94	112	94	96	112	114	108	94	100	96	100	102	110	104	92	92	94	106	102	100	106
p2-r0.70	104	102	98	98	96	90	102	110	106	96	100	0	98	96	108	98	102	86	106	94	106	102	98	96	92	84	98	114	106	108	108	84	98	96	114
p2-r0.80	100	114	102	110	100	90	98	108	106	108	110	98	0	96	106	92	106	102	92	88	98	98	104	108	94	102	88	106	104	100	110	96	98	106	110
p2-r0.90	104	112	106	108	100	98	90	108	112	104	106	96	96	0	104	100	104	104	92	78	96	106	106	102	90	94	82	104	112	114	110	100	100	98	108
p3-r0.30	80	96	106	92	88	106	110	80	86	106	94	108	106	104	0	84	102	102	100	106	98	102	98	104	108	104	102	96	100	96	96	112	106	108	98
p3-r0.40	84	112	96	110	92	102	104	86	94	110	112	98	92	100	84	0	108	106	96	98	92	100	94	108	94	98	96	104	108	108	110	96	102	104	104
p3-r0.50	108	96	108	98	108	98	108	106	88	84	94	102	106	104	102	108	0	90	108	108	110	98	96	98	106	98	106	108	98	92	88	106	104	100	110
p3-r0.60	102	86	104	86	106	96	104	104	100	76	96	86	102	104	102	106	90	0	108	110	112	104	102	90	94	94	110	112	102	100	94	102	104	104	112
p3-r0.70	106	110	108	110	88	110	102	106	114	108	112	106	92	92	100	96	108	108	0	90	94	106	102	108	88	92	88	106	104	108	104	94	92	104	104
p3-r0.80	106	118	110	114	102	104	102	108	114	110	114	94	88	78	106	98	108	110	90	0	92	112	110	110	94	90	82	106	114	104	108	98	100	102	108
p3-r0.90	102	110	102	106	98	96	110	100	108	110	108	106	98	96	98	92	110	112	94	92	0	100	104	112	96	98	92	92	114	100	108	90	82	98	98
p4-r0.30	102	102	92	92	104	94	104	100	92	102	94	102	98	106	102	100	98	104	106	112	100	0	80	100	98	98	108	112	102	104	104	96	98	98	118
p4-r0.40	110	96	84	94	94	102	102	104	90	94	100	98	104	106	98	94	96	102	102	110	104	80	0	98	96	96	104	116	98	100	92	96	98	96	118
p4-r0.50	96	100	98	96	112	106	100	106	96	84	96	96	108	102	104	108	98	90	108	110	112	100	98	0	96	98	106	110	92	98	98	98	108	106	112
p4-r0.60	110	104	94	94	104	86	96	110	96	100	100	92	94	90	108	94	106	94	88	94	96	98	96	96	0	78	94	116	104	96	98	86	92	98	110
p4-r0.70	114	104	96	100	102	96	96	112	106	98	102	84	102	94	104	98	98	94	92	90	98	98	96	98	78	0	92	112	110	98	92	92	88	96	114
p4-r0.80	104	114	104	114	98	108	98	106	106	106	110	98	88	82	102	96	106	110	88	82	92	108	104	106	94	92	0	96	104	104	104	94	84	94	104
p4-r0.90	84	108	110	106	102	110	110	92	102	106	104	114	106	104	96	104	108	112	106	106	92	112	116	110	116	112	96	0	106	98	102	110	104	104	86
p5-r0.30	96	90	98	92	104	106	104	92	88	96	92	106	104	112	100	108	98	102	104	114	114	102	98	92	104	110	104	106	0	94	94	104	104	104	108
p5-r0.40	104	92	102	94	112	100	108	100	88	100	92	108	100	114	96	108	92	100	108	104	100	104	100	98	96	98	104	98	94	0	78	98	96	102	106
p5-r0.50	102	90	98	92	106	102	112	100	84	96	94	108	110	110	96	110	88	94	104	108	108	104	92	98	98	92	104	102	94	78	0	102	98	106	106
p5-r0.60	106	108	94	102	106	96	100	114	108	106	106	84	96	100	112	96	106	102	94	98	90	96	96	98	86	92	94	110	104	98	102	0	84	88	108
p5-r0.70	106	104	96	98	104	94	100	110	98	104	102	98	98	100	106	102	104	104	92	100	82	98	98	108	92	88	84	104	104	96	98	84	0	88	102
p5-r0.80	106	106	98	98	102	94	104	100	102	100	100	96	106	98	108	104	100	104	104	102	98	98	96	106	98	96	94	104	104	102	106	88	88	0	104
p5-r0.90	100	114	112	110	110	116	112	102	108	110	106	114	110	108	98	104	110	112	104	108	98	118	118	112	110	114	104	86	108	106	106	108	102	104	0

## Sheet: S6-PCoA analysis
Table S6. Results of Principal Component Analysis (PCoA).
dataset	SNP number	PCoA1	PCoA2
p1-r0.40	23106	-39.9939	1.97034
p1-r0.60	9467	-35.9999	9.37933
p2-r0.40	9165	-35.4907	-5.4913
p2-r0.60	3200	-34.3538	3.93688
p5-r0.30	3537	-28.7458	-5.10121
p2-r0.50	5621	-26.8137	20.3059
p5-r0.50	1308	-26.7549	3.99224
p3-r0.50	3485	-23.0392	14.123
p3-r0.60	1979	-21.7154	23.4826
p5-r0.40	2140	-19.9083	0.771858
p4-r0.50	2233	-19.3021	17.6423
p2-r0.30	15322	-19.0376	-44.3246
p3-r0.30	9712	-14.3005	-39.7636
p1-r0.30	35804	-11.488	-44.291
p4-r0.40	3769	-11.1033	18.8207
p4-r0.30	6246	-9.14523	13.7263
p1-r0.50	15205	-6.31599	11.0181
p4-r0.90	151	2.19647	-47.2282
p1-r0.80	3463	7.10049	18.6421
p5-r0.90	89	7.52801	-38.4431
p5-r0.80	196	10.3578	8.65763
p2-r0.70	1753	12.6403	27.5372
p1-r0.70	5897	13.0176	-24.6568
p1-r0.90	1513	15.63	15.3262
p4-r0.60	1195	18.5253	28.953
p4-r0.70	640	19.3723	30.7835
p3-r0.40	5856	19.6998	-24.7693
p5-r0.70	358	20.6212	10.1829
p5-r0.60	655	24.4371	22.626
p2-r0.80	851	30.141	0.313039
p3-r0.90	214	31.0865	-17.5782
p3-r0.70	1031	35.3155	-6.62071
p2-r0.90	340	36.8926	3.96333
p4-r0.80	343	39.9196	-6.55437
p3-r0.80	527	46.0564	-1.76913

## Sheet: S7-Structure CV error
Table S7. The cross validation (CV) error of Structure analysis
dataset	variant sites	K=1	K=2	K=3	K=4	K=5	K=6
p1-r0.30	30406	0.79139	1.11234	1.11549	1.0746	1.01468	0.9075
p1-r0.40	18457	0.76072	0.92559	0.94172	1.05088	0.95349	0.94467
p1-r0.50	11374	0.7258	0.97178	1.01742	0.95972	0.93869	0.90738
p1-r0.60	6481	0.69986	0.90648	0.9267	0.91738	0.99378	0.91762
p1-r0.70	3697	0.73474	0.89548	0.91951	0.90508	0.8868	0.91325
p1-r0.80	1960	0.7274	0.83776	0.86723	0.83734	0.89842	0.7932
p1-r0.90	779	0.77174	0.76814	0.75858	0.66938	0.68663	0.7241
p2-r0.30	15154	0.58571	0.74998	0.92008	1.10684	1.12364	1.15944
p2-r0.40	8993	0.56108	0.69314	0.87944	1.00495	1.11885	1.07087
p2-r0.50	5449	0.55526	0.65304	0.81504	0.87631	1.01375	1.07087
p2-r0.60	3084	0.56009	0.6699	0.75902	0.86052	0.8893	0.90961
p2-r0.70	1663	0.58307	0.64284	0.69904	0.76529	0.83529	0.8391
p2-r0.80	807	0.61139	0.57876	0.64666	0.72198	0.74898	0.73957
p2-r0.90	326	0.70302	0.60967	0.62136	0.6646	0.68798	0.74895
p3-r0.30	9596	0.52287	0.63667	0.78577	0.95193	1.07194	1.13537
p3-r0.40	5762	0.51573	0.60382	0.72107	0.8705	0.96094	1.08203
p3-r0.50	3412	0.51383	0.58761	0.6727	0.78265	0.88937	0.9539
p3-r0.60	1928	0.53319	0.60485	0.65178	0.73582	0.78848	0.90274
p3-r0.70	994	0.56222	0.54591	0.62983	0.69654	0.7851	0.8267
p3-r0.80	503	0.61224	0.53784	0.59857	0.65557	0.67201	0.74
p3-r0.90	209	0.70142	0.5789	0.58911	0.58116	0.6338	0.65925
p4-r0.30	6203	0.5003	0.57852	0.69297	0.82438	0.9472	1.05441
p4-r0.40	3740	0.4947	0.56292	0.66267	0.75116	0.8669	0.96492
p4-r0.50	2210	0.50104	0.54364	0.63332	0.71194	0.82579	0.8939
p4-r0.60	1186	0.51291	0.53501	0.60484	0.66722	0.7413	0.80724
p4-r0.70	630	0.55934	0.54396	0.5841	0.65071	0.70187	0.75878
p4-r0.80	336	0.62938	0.5478	0.57468	0.60173	0.66491	0.69656
p4-r0.90	149	0.73672	0.59141	0.58942	0.57488	0.64057	0.62941
p5-r0.30	3537	0.48543	0.54053	0.65159	0.75593	0.85749	0.95616
p5-r0.40	2140	0.49571	0.52422	0.61754	0.70478	0.79721	0.8939
p5-r0.50	1308	0.50085	0.52909	0.60979	0.67297	0.7469	0.80695
p5-r0.60	655	0.52996	0.5129	0.56568	0.62733	0.66614	0.74364
p5-r0.70	358	0.58312	0.51726	0.55873	0.58854	0.64137	0.73907
p5-r0.80	196	0.65869	0.55168	0.54172	0.56626	0.61129	0.67595
p5-r0.90	89	0.80954	0.56298	0.54653	0.50949	0.55258	0.62422

## Sheet: S8-Structure plot of p3-r0.70
Table S8. Genetic component propotion of Structure analysis with p3-r0.70 datasets
id	group	species	location	p1	p2
110903-1	Mul_BB	Mul	BB	0.99999	1e-05
110903-10	Mul_BB	Mul	BB	0.99999	1e-05
110903-11	Mul_BB	Mul	BB	0.99999	1e-05
110903-2	Mul_BB	Mul	BB	0.99999	1e-05
110903-3	Mul_BB	Mul	BB	0.99999	1e-05
110903-4	Mul_BB	Mul	BB	0.99999	1e-05
110903-5	Mul_BB	Mul	BB	0.99999	1e-05
110903-6	Mul_BB	Mul	BB	0.99999	1e-05
110903-7	Mul_BB	Mul	BB	0.99999	1e-05
110903-8	Mul_BB	Mul	BB	0.99999	1e-05
110903-9	Mul_BB	Mul	BB	0.99999	1e-05
110903-a	Mul_BB	Mul	BB	0.99999	1e-05
110905-1	Sin_BB	Sin	BB	0.99999	1e-05
110905-2	Sin_BB	Sin	BB	0.99999	1e-05
110905-3	Sin_BB	Sin	BB	0.99999	1e-05
110905-4	Sin_BB	Sin	BB	0.99999	1e-05
110905-5	Sin_BB	Sin	BB	0.99999	1e-05
110905-9	Sin_BB	Sin	BB	0.99999	1e-05
110905-a	Sin_BB	Sin	BB	0.502515	0.497485
110905-6	Sin_BB	Sin	BB	1e-05	0.99999
110905-7	Sin_BB	Sin	BB	1e-05	0.99999
110905-8	Sin_BB	Sin	BB	1e-05	0.99999
111004-1	Mul_NG	Mul	NG	0.491552	0.508448
111004-3	Mul_NG	Mul	NG	0.552453	0.447547
111004-4	Mul_NG	Mul	NG	1e-05	0.99999
111005-2	Sin_NG	Sin	NG	0.561251	0.438749
111005-3	Sin_NG	Sin	NG	0.601479	0.398521
111005-6	Sin_NG	Sin	NG	0.147324	0.852676
111005-1	Sin_NG	Sin	NG	1e-05	0.99999
111005-4	Sin_NG	Sin	NG	1e-05	0.99999
111005-5	Sin_NG	Sin	NG	1e-05	0.99999
111007-1	Sp_NG	Sp	NG	0.110604	0.889396
111007-2	Sp_NG	Sp	NG	0.057206	0.942794
111006-3	Lon_NG	Lon	NG	0.489564	0.510436
111006-4	Lon_NG	Lon	NG	0.605066	0.394934
111102-1	Mul_NP	Mul	NP	0.536842	0.463158
111102-2	Mul_NP	Mul	NP	0.543525	0.456475
111104-1	Sin_NP	Sin	NP	0.559864	0.440136
111104-2	Sin_NP	Sin	NP	1e-05	0.99999
111104-3	Sin_NP	Sin	NP	1e-05	0.99999
111101-2	Lon_NP	Lon	NP	0.541288	0.458712
111101-1	Lon_NP	Lon	NP	1e-05	0.99999
111201-1	Mul_ML	Mul	ML	0.184366	0.815634
111201-2	Mul_ML	Mul	ML	1e-05	0.99999
111201-3	Mul_ML	Mul	ML	1e-05	0.99999
111201-4	Mul_ML	Mul	ML	1e-05	0.99999
111201-5	Mul_ML	Mul	ML	1e-05	0.99999
111203-1	Sin_ML	Sin	ML	0.708111	0.291889
111203-2	Sin_ML	Sin	ML	0.468148	0.531852
111203-3	Sin_ML	Sin	ML	1e-05	0.99999
111403-1	Mul_PT	Mul	PT	1e-05	0.99999
111403-2	Mul_PT	Mul	PT	1e-05	0.99999
111403-3	Mul_PT	Mul	PT	1e-05	0.99999
111403-4	Mul_PT	Mul	PT	1e-05	0.99999
111403-5	Mul_PT	Mul	PT	1e-05	0.99999
111403-6	Mul_PT	Mul	PT	1e-05	0.99999
111403-7	Mul_PT	Mul	PT	1e-05	0.99999
111403-8	Mul_PT	Mul	PT	1e-05	0.99999
111403-9	Mul_PT	Mul	PT	1e-05	0.99999
111401-1	Sin_PT	Sin	PT	1e-05	0.99999
111401-2	Sin_PT	Sin	PT	1e-05	0.99999
111401-3	Sin_PT	Sin	PT	1e-05	0.99999
111401-4	Sin_PT	Sin	PT	1e-05	0.99999
111404-1	Sp_PT	Sp	PT	1e-05	0.99999
111404-2	Sp_PT	Sp	PT	1e-05	0.99999

## Sheet: S9-SNPs statistics of p1-r0.60
Table S9. SNP statistics of p1-r0.60 datasets
# Variant positions
# Pop ID	Private	Num_Indv	Var	StdErr	P	Var	StdErr	Obs_Het	Var	StdErr	Obs_Hom	Var	StdErr	Exp_Het	Var	StdErr	Exp_Hom	Var	StdErr	Pi	Var	StdErr	Fis	Var	StdErr
BB	381	17.1751	6.52828	0.04494	0.92732	0.01153	0.00189	0.1168	0.04165	0.00359	0.8832	0.04165	0.00359	0.11173	0.01619	0.00224	0.88827	0.01619	0.00224	0.11527	0.01726	0.00231	0.03708	0.13287	0.04494
NG	573	9.8632	2.58098	0.02225	0.89711	0.01893	0.00191	0.15594	0.06412	0.00351	0.84406	0.06412	0.00351	0.14675	0.02433	0.00216	0.85325	0.02433	0.00216	0.15519	0.02732	0.00229	0.03164	0.1643	0.02225
NP	221	5.71069	0.6017	0.0119	0.89846	0.02042	0.00219	0.16309	0.07292	0.00414	0.83691	0.07292	0.00414	0.14162	0.02806	0.00257	0.85838	0.02806	0.00257	0.15601	0.03418	0.00284	0.00498	0.12679	0.0119
ML	390	6.13749	1.16666	0.01313	0.86401	0.02622	0.00197	0.22184	0.10016	0.00385	0.77816	0.10016	0.00385	0.18258	0.03198	0.00217	0.81742	0.03198	0.00217	0.20043	0.03883	0.0024	-0.01523	0.17898	0.01313
PT	616	11.2393	3.56617	0.02502	0.89451	0.01929	0.00184	0.16946	0.07127	0.00354	0.83054	0.07127	0.00354	0.15015	0.02425	0.00206	0.84985	0.02425	0.00206	0.15775	0.02687	0.00217	0.01291	0.17154	0.02502
# All positions (variant and fixed)
# Pop ID	Private	Sites	Variant_Sites	Polymorphic_Sites	%Polymorphic_Loci	Num_Indv	Var	StdErr	P	Var	StdErr	Obs_Het	Var	StdErr	Obs_Hom	Var	StdErr	Exp_Het	Var	StdErr	Exp_Hom	Var	StdErr	Pi	Var	StdErr	Fis	Var	StdErr
NG	573	1593906	5212	3463	0.21727	10.3744	3.51042	0.00148	0.99966	0.0001	1e-05	0.00051	0.00029	1e-05	0.99949	0.00029	1e-05	0.00048	0.00015	1e-05	0.99952	0.00015	1e-05	0.00051	0.00017	1e-05	0.0001	0.00054	0.00148
NP	221	1273261	4248	2156	0.16933	5.96463	0.73153	0.00076	0.99966	0.0001	1e-05	0.00054	0.00033	2e-05	0.99946	0.00033	2e-05	0.00047	0.00016	1e-05	0.99953	0.00016	1e-05	0.00052	0.00019	1e-05	2e-05	0.00042	0.00076
BB	381	1012811	3232	2285	0.22561	18.5242	8.37197	0.00288	0.99977	5e-05	1e-05	0.00037	0.00018	1e-05	0.99963	0.00018	1e-05	0.00036	9e-05	1e-05	0.99964	9e-05	1e-05	0.00037	0.0001	1e-05	0.00012	0.00043	0.00288
ML	390	2180009	6764	4236	0.19431	6.35214	1.43551	0.00081	0.99958	0.00014	1e-05	0.00069	0.00046	1e-05	0.99931	0.00046	1e-05	0.00057	0.0002	1e-05	0.99943	0.0002	1e-05	0.00062	0.00024	1e-05	-5e-05	0.00056	0.00081
PT	616	1836196	5697	3942	0.21468	11.7596	4.92188	0.00164	0.99967	9e-05	1e-05	0.00053	0.00031	1e-05	0.99947	0.00031	1e-05	0.00047	0.00014	1e-05	0.99953	0.00014	1e-05	0.00049	0.00016	1e-05	4e-05	0.00053	0.00164

## Sheet: S10-Dsuite for p1-r0.60 dataset
Table S10. all combinations in ABBA-BABA test of p1-r0.60 dataset.
P1	P2	P3	Dstatistic	Z.score	p.value	f4.ratio	BBAA	ABBA	BABA	adjust.p.value
Mul_BB	Lon_NG	Lon_NP	0.0145705	0.220205	0.825712	0.0162272	21.7732	14.6759	14.2544	0.880336
Lon_NG	Lon_NP	Mul_ML	0.118567	2.17137	0.0299033	0.204706	26.9895	21.659	17.0674	0.0715079
Lon_NP	Lon_NG	Mul_NG	0.0329011	0.669391	0.503246	0.0854039	31.6097	24.0179	22.4878	0.597378
Mul_NP	Lon_NG	Lon_NP	0.0177203	0.269863	0.787266	0.0200662	28.0512	21.2142	20.4754	0.854598
Lon_NG	Mul_BB	Sin_ML	0.238821	3.74532	0.000180161	0.379994	29.5782	26.4451	16.2489	0.00495443
Lon_NP	Lon_NG	Sin_ML	0.0785144	1.56196	0.118297	0.105653	26.3143	22.3789	19.1206	0.216878
Lon_NP	Lon_NG	Sin_NG	0.0758507	1.97939	0.0477723	0.256982	32.2583	24.4096	20.9677	0.109478
Lon_NP	Lon_NG	Sin_NP	0.016708	0.534079	0.593287	0.0290435	32.6174	21.4952	20.7887	0.671158
Lon_NP	Lon_NG	Sp_NG	0.059786	1.1984	0.23076	0.0367413	32.8754	18.0108	15.9787	0.355845
Lon_NG	Mul_BB	Mul_ML	0.0392718	1.2832	0.199421	0.0633948	33.856	17.6598	16.3252	0.322593
Lon_NG	Mul_BB	Mul_NG	0.0196137	0.452072	0.651217	0.0481513	34.0652	19.8654	19.1011	0.721146
Mul_NP	Mul_BB	Lon_NG	0.0433374	0.657325	0.510972	0.0659401	16.1719	15.1735	13.9129	0.602217
Lon_NG	Mul_BB	Sp_NG	0.165299	3.4065	0.00065802	0.123785	36.9235	23.543	16.8638	0.0098703
Lon_NP	Lon_NG	Sin_BB	0.134394	3.09135	0.00199247	0.350005	20.4358	18.0874	13.8017	0.0142938
Lon_NG	Mul_BB	Sin_NG	0.0451289	1.24009	0.214942	0.167583	34.4997	22.063	20.1576	0.337766
Lon_NG	Mul_BB	Sin_NP	0.0644363	1.13618	0.255882	0.121135	30.8805	15.2704	13.4216	0.367135
Lon_NP	Mul_BB	Sp_NG	0.295491	5.47731	4.3183e-08	0.197503	25.6879	20.7	11.257	7.12519e-06
Lon_NP	Mul_NP	Sp_NG	0.128164	2.92438	0.00345147	0.0737084	32.5841	20.6126	15.9292	0.0196377
Lon_NG	Mul_NP	Mul_ML	0.0441293	1.03708	0.299697	0.0744284	34.8135	19.6951	18.0303	0.392756
Sin_BB	Lon_NG	Mul_ML	0.0639563	1.47284	0.140794	0.101867	28.1711	19.8853	17.4946	0.249796
Lon_NG	Sin_ML	Mul_ML	0.0273196	0.913623	0.360915	0.0647928	39.3089	34.4247	32.5938	0.455138
Sin_NG	Lon_NG	Mul_ML	0.0735794	1.90655	0.0565794	0.145767	40.8201	34.7855	30.0174	0.126157
Mul_ML	Lon_NG	Sin_NP	0.0801589	1.72541	0.0844539	0.124694	22.6725	21.8741	18.6275	0.174186
Mul_ML	Lon_NG	Sp_NG	0.112675	2.30989	0.0208944	0.0737585	30.7669	30.5116	24.3321	0.0570373
Lon_NG	Mul_NP	Mul_NG	0.00114992	0.0218716	0.98255	0.00286271	35.4798	21.5123	21.4629	0.991487
Sin_BB	Lon_NG	Mul_NG	0.0962053	2.27647	0.022818	0.208459	29.5897	23.904	19.7083	0.0597614
Lon_NP	Sin_NP	Sp_NG	0.0733741	2.47418	0.0133544	0.0470792	24.1568	21.9308	18.9325	0.0440695
Mul_ML	Lon_NP	Mul_NG	0.178447	3.10026	0.00193352	0.314523	30.0519	25.6115	17.855	0.0142938
Mul_NG	Lon_NG	Sin_NP	0.118794	2.18105	0.0291796	0.197178	32.3136	28.7757	22.6649	0.0715079
Mul_NG	Lon_NG	Sp_NG	0.175927	2.37237	0.0176744	0.144623	49.6888	48.6948	34.1246	0.0502806
Lon_NG	Mul_NP	Sin_BB	0.036528	0.940395	0.347015	0.124271	22.0141	15.0207	13.962	0.443856
Mul_NP	Lon_NG	Sin_ML	0.0340525	0.696429	0.48616	0.0491764	31.2933	20.7472	19.3807	0.581278
Mul_NP	Lon_NG	Sin_NG	0.0174377	0.533232	0.593873	0.0665013	37.6659	23.4306	22.6275	0.671158
Lon_NG	Mul_NP	Sin_NP	0.0571122	1.12136	0.262137	0.111011	38.2132	23.2233	20.7139	0.36968
Lon_NG	Mul_NP	Sp_NG	0.0503873	1.23309	0.217543	0.0355442	38.7811	20.1506	18.2173	0.338628
Sin_BB	Lon_NG	Sin_ML	0.00551201	0.175127	0.86098	0.00933898	26.3657	22.2848	22.0405	0.904852
Mul_ML	Lon_NP	Sin_BB	0.162522	3.12883	0.00175505	0.324773	22.4804	20.3244	14.6417	0.0142938
Sin_BB	Lon_NG	Sin_NP	0.0642355	1.85252	0.0639518	0.119167	25.5857	17.4532	15.3463	0.138843
Mul_ML	Sin_ML	Sin_BB	0.117486	3.07169	0.00212852	0.316943	30.2601	30.1328	23.7969	0.0146336
Mul_NG	Lon_NG	Mul_ML	0.159864	2.96346	0.00304202	0.275875	43.6619	38.5764	27.9424	0.0193051
Sin_ML	Lon_NG	Sin_NP	0.0444128	0.912793	0.361352	0.0755963	28.2512	21.2564	19.4485	0.455138
Sin_ML	Lon_NG	Sp_NG	0.0765722	1.30485	0.191942	0.0566332	37.6317	31.739	27.224	0.313569
Sin_NG	Lon_NG	Sin_NP	0.000874743	0.0326998	0.973914	0.00186898	29.4964	26.2499	26.204	0.991487
Lon_NG	Sin_NG	Sp_NG	0.00687318	0.228147	0.819532	0.00610221	44.3301	38.3795	37.8555	0.880336
Lon_NG	Sin_NP	Sp_NG	0.0173634	0.457798	0.647098	0.0133945	24.6407	21.4413	20.7094	0.721146
Mul_BB	Lon_NP	Mul_ML	0.119498	2.17441	0.0296741	0.226463	22.3831	18.655	14.6724	0.0715079
Lon_NP	Mul_BB	Mul_NG	0.0845432	1.37426	0.169362	0.230121	24.9694	18.2354	15.3924	0.292351
Mul_NP	Mul_BB	Lon_NP	0.0580192	1.36623	0.171867	0.058695	25.5595	17.3111	15.4125	0.292351
Mul_NG	Lon_NP	Sin_NG	0.110126	2.57878	0.0099151	0.277763	31.8278	29.8484	23.9264	0.0363554
Mul_NG	Mul_BB	Mul_ML	0.184472	3.2311	0.00123315	0.290695	28.0469	26.6508	18.3495	0.0132025
Lon_NP	Mul_BB	Sin_NG	0.139674	2.38029	0.017299	0.479828	24.4041	19.5465	14.7554	0.0502806
Lon_NP	Mul_BB	Sin_NP	0.0391416	0.823253	0.410364	0.0810503	27.0147	18.3806	16.9959	0.509098
Mul_NG	Mul_BB	Sin_NP	0.216696	3.34133	0.000833774	0.360468	24.4533	22.8394	14.7039	0.0114644
Mul_NG	Mul_NP	Mul_ML	0.200053	3.30661	0.000944326	0.313916	29.8007	28.2451	18.828	0.0119857
Mul_NP	Lon_NP	Mul_ML	0.0487476	1.17282	0.24087	0.113518	33.0858	28.1194	25.5054	0.36205
Mul_NG	Sin_BB	Mul_ML	0.102498	2.81273	0.00491227	0.163437	25.3185	25.1009	20.4337	0.023839
Lon_NP	Mul_ML	Sin_ML	0.00347595	0.105189	0.916226	0.00507506	28.1965	27.1227	26.9348	0.950431
Mul_ML	Lon_NP	Sin_NG	0.0655259	1.44053	0.149717	0.163091	27.4376	21.7377	19.0641	0.262801
Mul_ML	Lon_NP	Sin_NP	0.0504305	1.10097	0.270909	0.0914568	32.9051	27.7058	25.0455	0.37563
Lon_NP	Mul_ML	Sp_NG	0.0904718	2.30147	0.0213649	0.0447361	25.5718	16.1802	13.4954	0.0570373
Lon_NP	Mul_NP	Mul_NG	0.0419628	0.728416	0.466359	0.109217	32.8202	26.4914	24.3576	0.561673
Sin_BB	Lon_NP	Mul_NG	0.0497133	2.21411	0.0268211	0.13275	22.4303	19.1423	17.3292	0.0680843
Mul_NG	Mul_NP	Sin_NG	0.159383	2.75806	0.00581447	0.418802	33.639	32.7783	23.7661	0.0274111
Mul_NG	Mul_NP	Sin_NP	0.154825	2.52188	0.0116731	0.270141	33.4867	32.3414	23.6695	0.04098
Mul_NG	Lon_NP	Sin_NP	0.105222	2.19341	0.028278	0.174163	31.1165	28.928	23.4199	0.070695
Mul_NG	Lon_NP	Sp_NG	0.0800493	1.11597	0.264434	0.0518332	30.1939	23.5744	20.0799	0.369759
Sin_BB	Mul_NP	Lon_NP	0.112573	1.5166	0.129367	0.117975	22.7286	22.2127	17.7177	0.234567
Lon_NP	Mul_NP	Sin_ML	0.0316095	0.809736	0.418092	0.0452909	31.6745	27.1369	25.4739	0.514815
Lon_NP	Mul_NP	Sin_NG	0.0647094	1.30883	0.190591	0.219426	32.9665	25.5143	22.4129	0.313569
Lon_NP	Mul_NP	Sin_NP	0.0374893	1.0853	0.277791	0.0857953	43.3574	36.7015	34.0491	0.381963
Mul_NG	Mul_NP	Sp_NG	0.175436	2.54872	0.010812	0.121237	33.3279	27.8234	19.518	0.0387822
Lon_NP	Sin_ML	Sin_BB	0.0028842	0.0983808	0.92163	0.00978598	21.1899	20.4484	20.3308	0.950431
Sin_BB	Lon_NP	Sin_NG	0.0454465	1.36639	0.171817	0.129699	21.9162	18.5597	16.9461	0.292351
Sin_BB	Lon_NP	Sin_NP	0.0756078	1.85847	0.0631017	0.148782	24.7206	21.1176	18.1487	0.138824
Sin_BB	Lon_NP	Sp_NG	0.034802	0.803513	0.421678	0.0201514	23.1932	14.6993	13.7106	0.515384
Lon_NP	Sin_ML	Sin_NG	0.00144759	0.0483514	0.961436	0.00526552	25.7697	22.0934	22.0295	0.985323
Sin_ML	Lon_NP	Sin_NP	0.040076	1.16014	0.245993	0.0777483	31.8235	27.8737	25.7257	0.3624
Lon_NP	Sin_ML	Sp_NG	0.0913366	1.7821	0.074733	0.055625	25.8005	19.5423	16.2712	0.156088
Sin_NP	Sin_NG	Lon_NP	0.00449391	0.218574	0.826982	0.00439409	26.8828	26.653	26.4145	0.880336
Mul_NG	Sin_BB	Sin_NP	0.110944	3.43498	0.000592589	0.189924	22.2784	21.4613	17.1748	0.00977772
Mul_NP	Mul_BB	Sin_ML	0.19127	2.86204	0.00420925	0.386343	27.8485	24.2923	16.4916	0.0231509
Mul_NP	Mul_BB	Sp_NG	0.180462	2.93297	0.00335732	0.132013	33.0216	19.4639	13.5128	0.0196377
Mul_BB	Mul_NP	Mul_ML	0.0318992	1.31387	0.188889	0.0551098	31.4488	15.9906	15.002	0.313569
Sin_BB	Mul_BB	Mul_ML	0.0844429	1.81597	0.0693755	0.156043	47.9802	26.4633	22.3421	0.14866
Mul_BB	Sin_ML	Mul_ML	0.0463056	1.27036	0.203955	0.106995	37.4767	26.5052	24.1592	0.326724
Sin_NG	Mul_BB	Mul_ML	0.0963365	2.31352	0.0206941	0.165042	26.2157	22.5869	18.6174	0.0570373
Mul_ML	Mul_BB	Sin_NP	0.0989826	1.70343	0.0884875	0.187355	19.8212	19.0639	15.6298	0.180252
Sin_BB	Mul_BB	Lon_NG	0.189968	3.21748	0.00129323	0.28274	35.0337	29.0052	19.7443	0.0132025
Mul_NP	Mul_BB	Mul_NG	0.00792163	0.197554	0.843394	0.0206036	29.3164	14.1809	13.958	0.892051
Sin_BB	Lon_NG	Sin_NG	0.0918985	2.58039	0.00986887	0.265173	30.6499	25.5687	21.2648	0.0363554
Sin_BB	Lon_NG	Sp_NG	0.106242	2.83988	0.00451312	0.0723359	33.0174	22.0201	17.7905	0.023839
Sin_BB	Mul_BB	Lon_NP	0.155249	2.43721	0.0148011	0.168379	36.363	23.8707	17.455	0.0477525
Sin_BB	Mul_BB	Mul_NG	0.105826	2.41717	0.0156419	0.231665	46.6382	26.1323	21.1307	0.0477525
Sin_BB	Mul_BB	Mul_NP	0.217166	3.64244	0.00027007	0.257127	31.285	27.0223	17.3797	0.00557019
Sin_BB	Mul_BB	Sin_ML	0.200317	3.58579	0.000336058	0.367676	41.4123	33.2523	22.1535	0.00616106
Sin_BB	Mul_BB	Sin_NG	0.123507	2.66659	0.00766251	0.376706	47.0881	28.7906	22.4607	0.0340232
Mul_NP	Mul_BB	Sin_NG	0.0493714	1.13634	0.255815	0.20041	30.0719	16.6896	15.1192	0.367135
Mul_BB	Mul_NP	Sin_NP	0.0192589	0.591514	0.554176	0.0406538	33.5858	17.401	16.7434	0.643937
Sin_BB	Mul_BB	Sp_NG	0.242747	5.13674	2.79542e-07	0.184953	48.529	30.1914	18.3968	2.30622e-05
Sin_BB	Mul_NP	Mul_ML	0.134641	2.61201	0.00900129	0.22218	26.5077	20.4696	15.6116	0.0345398
Sin_BB	Mul_ML	Sp_NG	0.0963319	2.82627	0.00470936	0.054753	20.5858	18.701	15.4146	0.023839
Sin_BB	Mul_BB	Sin_NP	0.108616	2.00683	0.0447676	0.213893	43.4946	22.3995	18.0103	0.104037
Sin_BB	Mul_NP	Sin_ML	0.0768245	2.65031	0.00804185	0.130592	24.1258	22.1889	19.0229	0.0340232
Sin_ML	Mul_BB	Sin_NG	0.110257	2.30028	0.0214322	0.35694	33.2629	23.7637	19.0438	0.0570373
Sin_ML	Mul_BB	Sin_NP	0.0823961	1.66781	0.0953538	0.157505	32.2535	18.5341	15.7123	0.185099
Sin_BB	Mul_NP	Sin_NG	0.136988	2.93042	0.00338506	0.381959	25.8753	20.0203	15.1961	0.0196377
Sin_NG	Mul_BB	Sin_NP	0.0586828	1.17087	0.241651	0.127934	22.6961	19.3312	17.1881	0.36205
Sin_BB	Mul_NP	Sp_NG	0.148731	3.26171	0.00110742	0.0907302	28.0391	17.4015	12.8954	0.0130517
Sin_BB	Sin_ML	Sp_NG	0.122928	2.62934	0.00855503	0.0797687	28.0362	21.8664	17.079	0.0341224
Sin_BB	Sin_NP	Sp_NG	0.108911	2.62418	0.0086857	0.071043	18.4095	18.0409	14.4971	0.0341224
Sin_ML	Lon_NG	Mul_NG	0.196373	3.11569	0.00183516	0.389653	44.5956	42.3513	28.4482	0.0142938
Mul_ML	Sin_ML	Mul_NG	0.0145715	0.549854	0.582419	0.0258418	46.6952	35.1647	34.1546	0.671158
Mul_ML	Sin_NG	Mul_NG	0.0297092	1.65727	0.0974647	0.0546189	41.2767	37.7718	35.5922	0.186996
Mul_ML	Sin_NP	Mul_NG	0.00441727	0.143441	0.885942	0.0075898	25.4887	22.2659	22.0701	0.925193
Sp_NG	Mul_ML	Mul_NG	0.0545186	1.03151	0.302303	0.0906595	34.5752	31.0268	27.8186	0.392756
Sin_ML	Lon_NG	Sin_NG	0.10751	2.49709	0.0125216	0.402599	40.0868	39.2941	31.6653	0.0421646
Mul_NP	Sin_ML	Mul_ML	0.0340992	1.81013	0.0702758	0.0841117	30.9508	29.3454	27.41	0.14866
Sin_ML	Mul_BB	Lon_NP	0.13108	2.42657	0.0152425	0.147385	26.7472	21.6804	16.6554	0.0477525
Mul_ML	Mul_NP	Sin_NP	0.0833171	1.67849	0.0932515	0.160143	30.8186	30.5426	25.8446	0.185099
Mul_ML	Mul_NP	Sp_NG	0.0752765	1.97322	0.04847	0.0411837	21.376	17.2567	14.8405	0.109555
Sin_ML	Lon_NP	Mul_NG	0.150622	3.6981	0.00021722	0.28274	28.3233	25.7264	18.991	0.00512019
Sin_NG	Sin_BB	Mul_ML	0.00827681	0.367629	0.71315	0.0149895	23.0087	21.959	21.5985	0.784465
Sin_BB	Mul_ML	Sin_NP	0.0107219	0.534742	0.592828	0.0212263	18.9302	18.6127	18.2178	0.671158
Sin_ML	Mul_BB	Mul_NG	0.170978	2.72773	0.0063772	0.333079	37.7043	25.9673	18.3842	0.0292288
Mul_ML	Sin_ML	Sin_NG	0.0365415	1.69233	0.0905835	0.111492	41.7612	37.6902	35.0328	0.182272
Mul_ML	Sin_ML	Sin_NP	0.0223851	1.07058	0.284358	0.0409155	33.6659	27.617	26.4076	0.387761
Mul_ML	Sin_ML	Sp_NG	0.0370531	1.05539	0.291248	0.0249603	37.9326	32.0279	29.7392	0.390699
Sin_NP	Sin_NG	Mul_ML	0.0101736	0.45883	0.646356	0.0158496	24.0947	21.4103	20.9791	0.721146
Sp_NG	Sin_NG	Mul_ML	0.0346201	1.1305	0.258267	0.0650714	35.3347	30.4053	28.3705	0.367363
Sp_NG	Sin_NP	Mul_ML	0.015177	0.293318	0.769279	0.0216671	18.6339	18.3685	17.8193	0.840603
Sin_BB	Mul_NP	Mul_NG	0.12863	2.21632	0.0266696	0.302932	25.5904	19.3298	14.9238	0.0680843
Sin_ML	Mul_BB	Sp_NG	0.17829	3.79583	0.000147152	0.123766	32.5186	22.4023	15.6228	0.00485602
Sin_ML	Mul_NP	Mul_NG	0.212101	3.01051	0.00260812	0.402295	29.4939	28.0679	18.2449	0.0172136
Sin_NG	Lon_NG	Mul_NG	0.136509	2.65757	0.00787074	0.314218	57.1099	54.3688	41.308	0.0340232
Sin_NG	Mul_BB	Mul_NG	0.168546	3.09452	0.00197129	0.356054	32.9482	30.727	21.8631	0.0142938
Sin_ML	Sin_BB	Mul_NG	0.0611326	2.0807	0.0374618	0.122154	30.0878	24.1364	21.3554	0.0883028
Sin_NG	Mul_BB	Sp_NG	0.10295	2.42238	0.015419	0.0847581	26.4613	25.906	21.0698	0.0477525
Sin_NG	Mul_NP	Mul_ML	0.123938	2.50254	0.0123307	0.208459	24.8248	24.7369	19.2814	0.0421646
Mul_NG	Sin_BB	Sp_NG	0.0757465	1.59175	0.111442	0.051122	29.4836	24.4791	21.0318	0.208954
Sin_ML	Sin_NG	Mul_NG	0.0118418	0.608304	0.542986	0.0231239	44.5751	37.9935	37.1042	0.635409
Sin_NP	Sin_ML	Mul_NG	0.022151	0.787946	0.430728	0.0402685	26.8656	23.2344	22.2274	0.522574
Sp_NG	Sin_ML	Mul_NG	0.0465481	1.04187	0.297472	0.0895776	40.5366	34.4755	31.4087	0.392756
Sin_NP	Sin_NG	Mul_NG	0.000272131	0.011617	0.990731	0.000507099	33.5122	27.2123	27.1975	0.991487
Sp_NG	Sin_NG	Mul_NG	0.0688003	1.6705	0.0948208	0.138693	55.3086	45.3041	39.4715	0.185099
Sp_NG	Sin_NP	Mul_NG	0.0677739	1.35029	0.176922	0.110353	28.7831	25.0706	21.888	0.297879
Sin_NG	Sin_BB	Mul_NG	0.0725554	2.81554	0.00486954	0.155142	29.4344	28.5467	24.6845	0.023839
Sp_NG	Sin_NG	Lon_NP	0.131917	3.10312	0.00191491	0.110472	25.8016	24.5422	18.8218	0.0142938
Sin_BB	Mul_NP	Sin_NP	0.126303	2.37259	0.0176637	0.246445	29.0506	22.5084	17.4603	0.0502806
Sp_NG	Mul_BB	Mul_ML	0.160118	3.20295	0.00136026	0.239237	23.2932	20.7414	15.016	0.0132025
Sin_ML	Mul_NP	Sin_NG	0.0636375	1.49095	0.135976	0.220283	26.6544	23.8662	21.0104	0.24387
Sin_ML	Mul_NP	Sin_NP	0.0687793	1.64204	0.100582	0.135577	33.0364	29.3743	25.5936	0.190759
Sin_ML	Mul_NP	Sp_NG	0.0543526	0.977497	0.328323	0.0363042	26.383	19.9317	17.8767	0.423229
Sin_NG	Mul_NP	Sin_NP	0.044219	1.17171	0.241314	0.0959831	29.15	28.886	26.4396	0.36205
Mul_NP	Sin_NG	Sp_NG	0.0465926	1.03435	0.300973	0.0365121	26.8271	24.773	22.5673	0.392756
Sin_NP	Mul_NP	Sp_NG	0.0339806	0.833074	0.404803	0.0238304	26.8741	22.414	20.9407	0.506004
Sin_BB	Sin_ML	Sin_NG	0.0315056	1.13982	0.254361	0.0944004	27.67	24.0296	22.5617	0.367135
Sin_BB	Sin_ML	Sin_NP	0.0254622	1.16613	0.243561	0.0517965	24.8329	19.263	18.3064	0.36205
Sp_NG	Mul_BB	Mul_NG	0.262392	3.83449	0.000125827	0.484773	33.7947	31.7652	18.5602	0.00485602
Sin_NP	Sin_NG	Sin_BB	0.0201816	1.26085	0.207361	0.0398743	20.1982	19.2942	18.5308	0.328986
Sp_NG	Mul_BB	Sin_NP	0.123044	2.4108	0.0159175	0.232052	22.0074	19.3052	15.0749	0.0477525
Sp_NG	Sin_NG	Sin_BB	0.133186	4.03316	5.50327e-05	0.247781	26.7343	25.8529	19.7758	0.0030268
Sin_ML	Sin_NG	Sin_NP	0.0328736	1.5637	0.117888	0.0603217	23.921	23.5154	22.0185	0.216878
Sp_NG	Sin_NG	Sin_ML	0.0326655	1.06119	0.288606	0.0479725	34.3301	32.6104	30.5473	0.390328
Sin_NP	Sin_ML	Sp_NG	0.000575559	0.0106693	0.991487	0.000403318	21.2298	19.9251	19.9021	0.991487
Sp_NG	Sin_NG	Sin_NP	0.0636987	2.63858	0.00832538	0.104329	25.1891	24.2087	21.3093	0.0341224

[truncated: 1 more sheets: Sheet1]
