# Supplementary figures and images for: Resolving Relationships of Bolbitis sinensis Species Complex Using RAD Sequencing
Source: Preprints.org preprint supplement (doi:10.20944/preprints202406.0083.v1), 2024-06-03

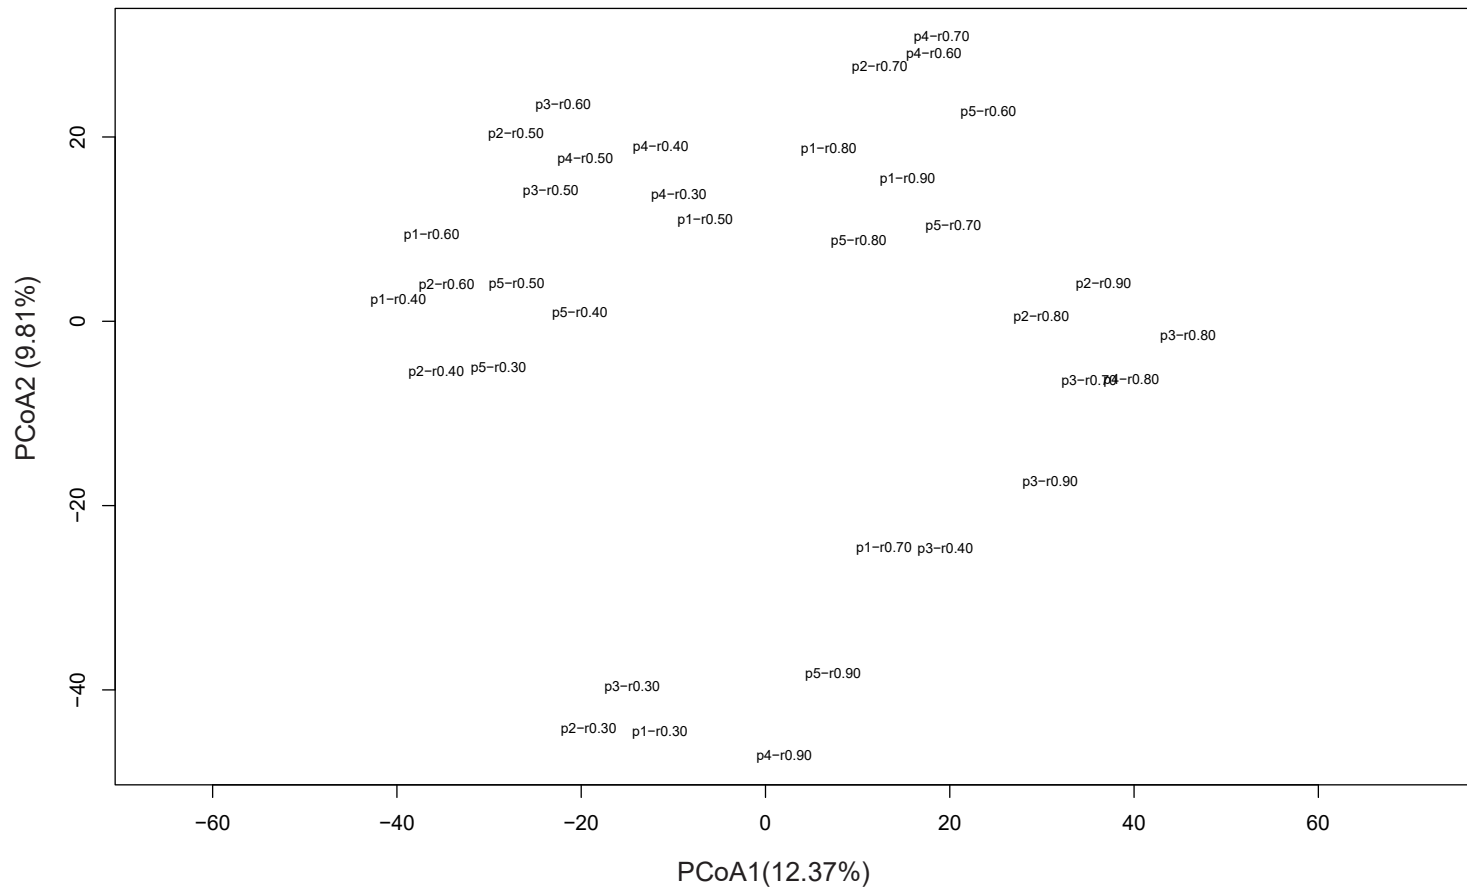

Supplement: Supplementary file 1 [file supplementary]

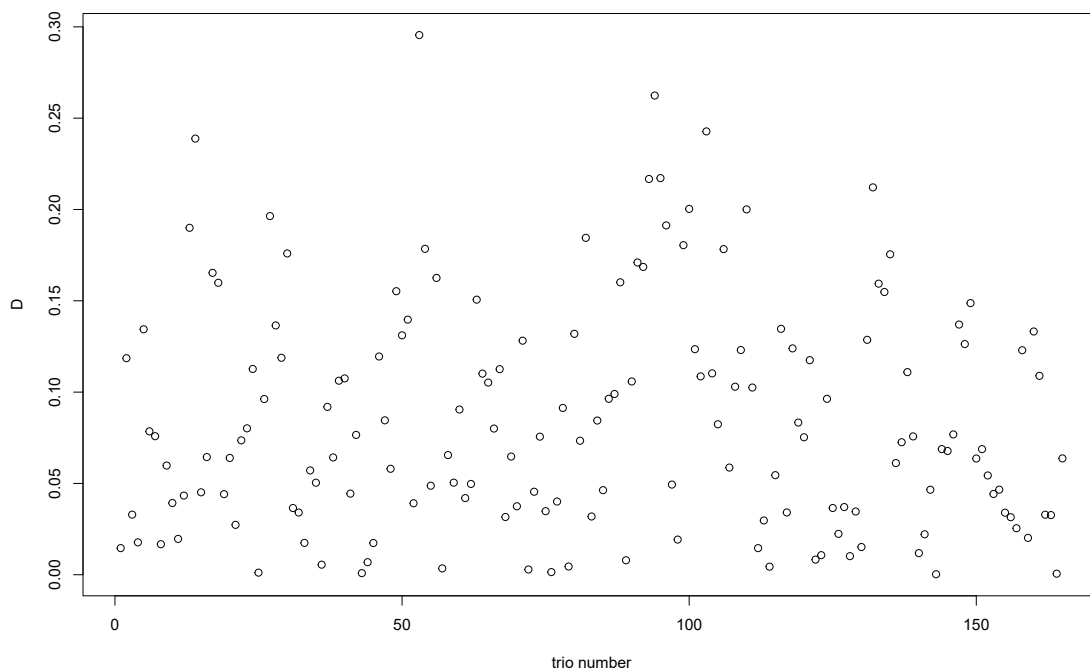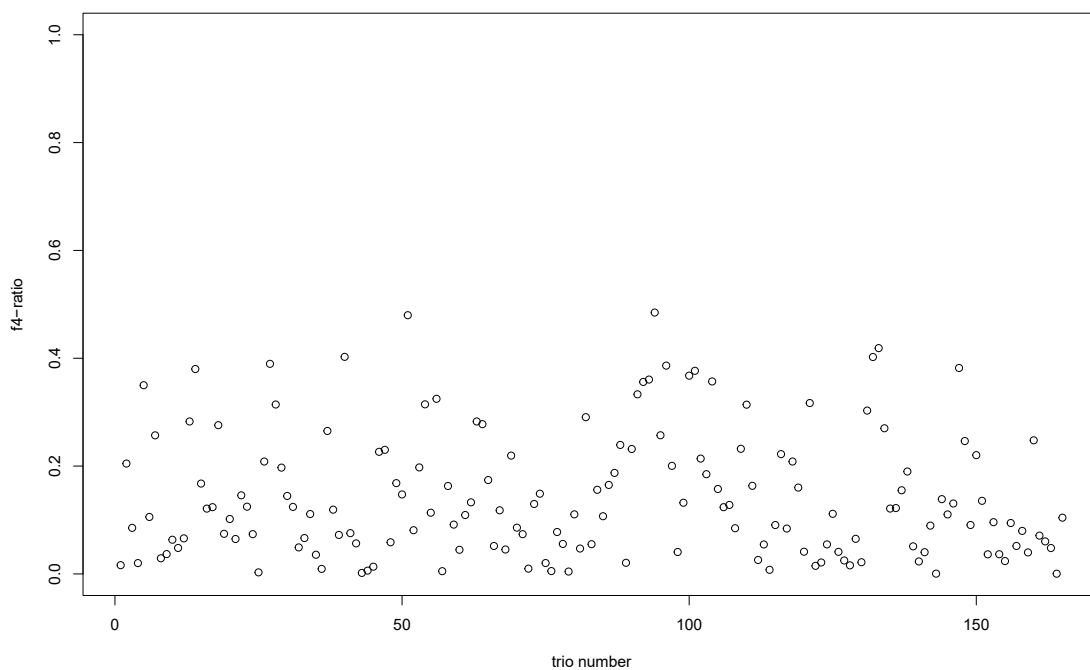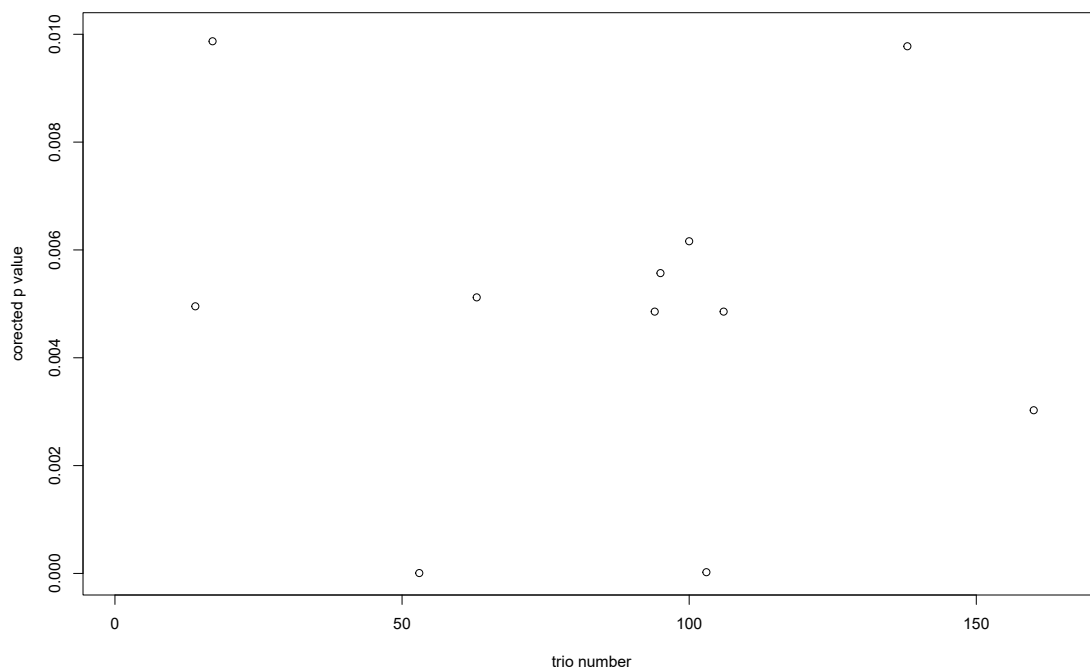

Supplement: Supplementary file 2 [file supplementary]

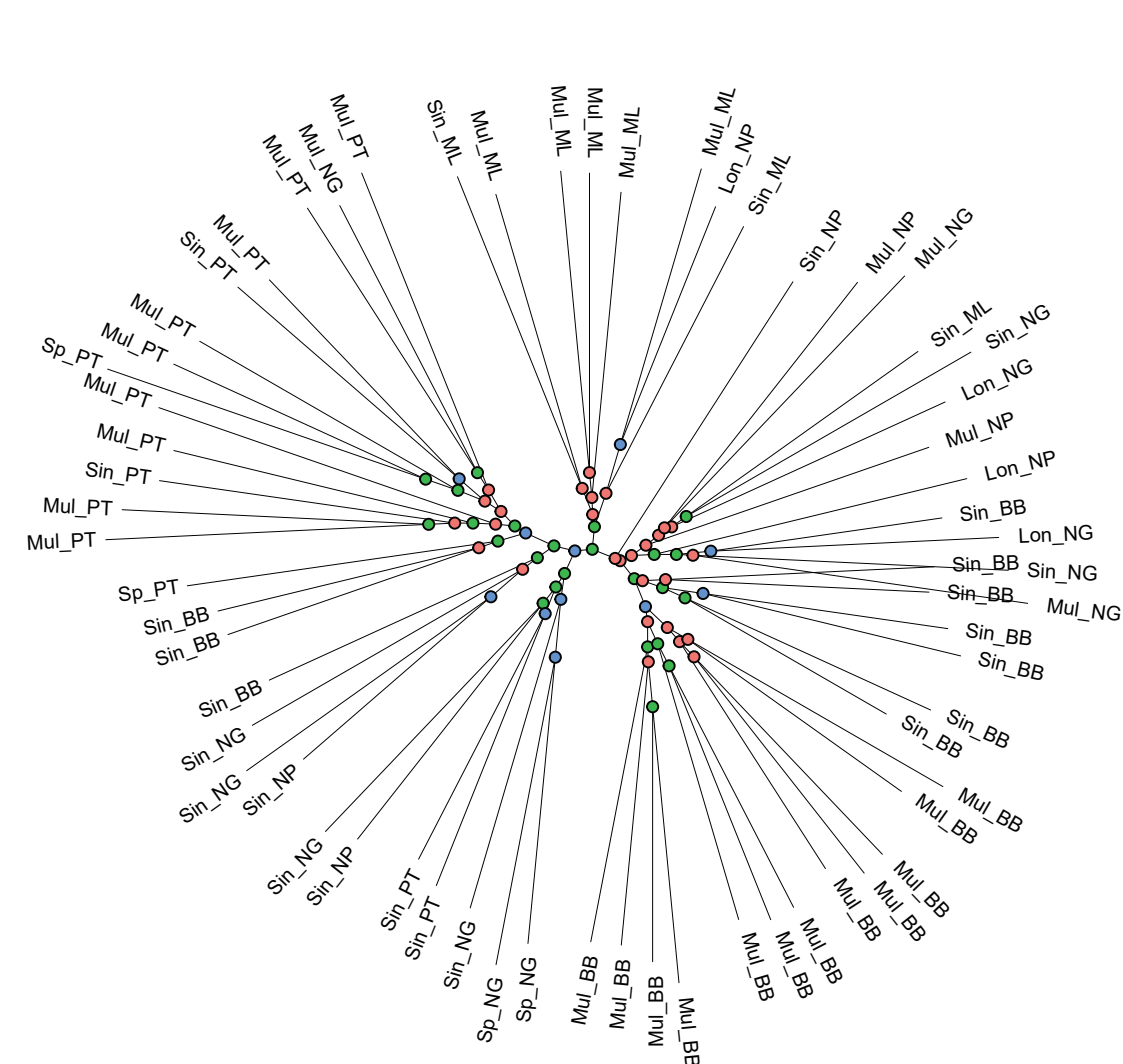

p1-r0.30 26,955

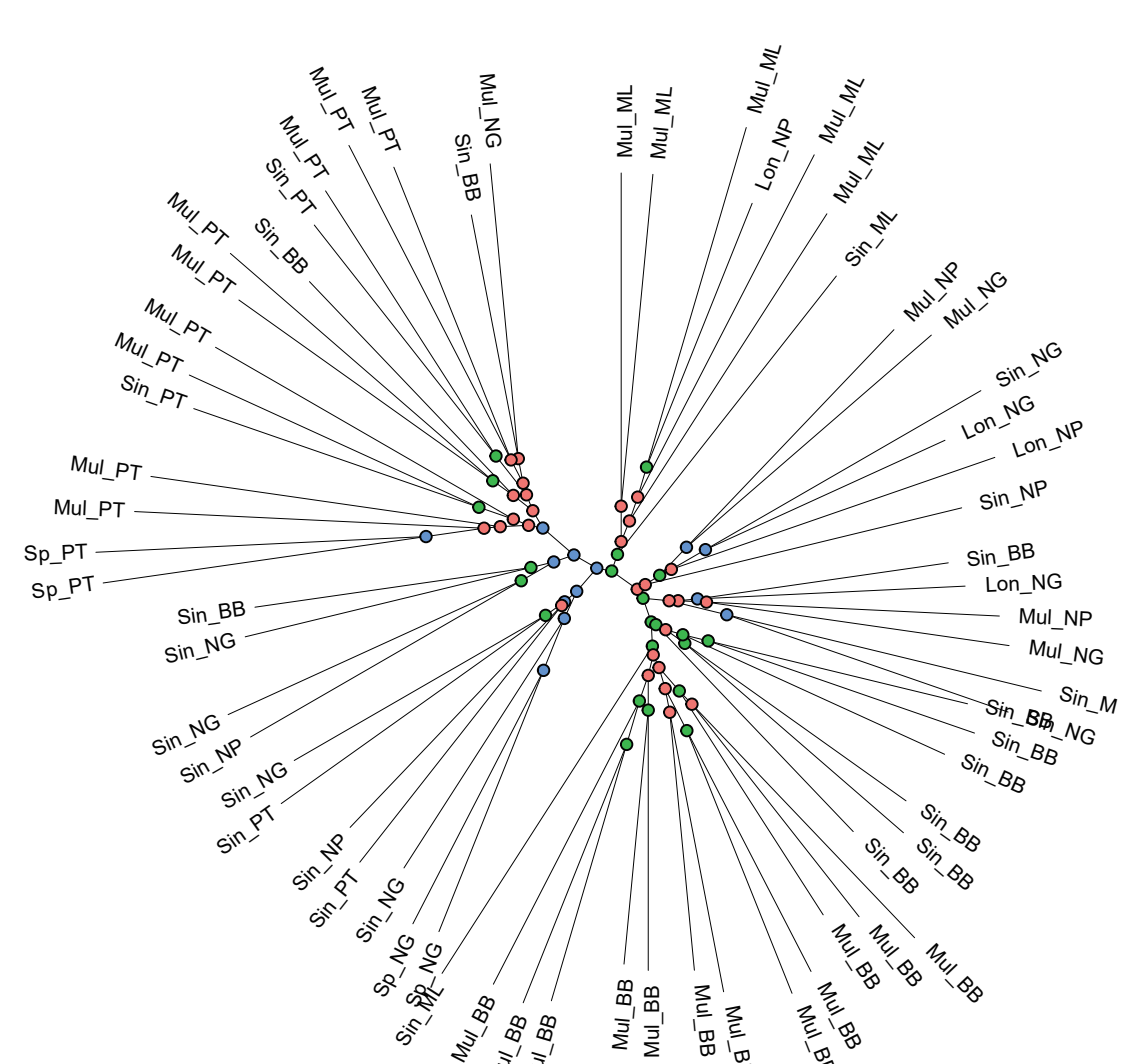

p1-r0.40 17,475

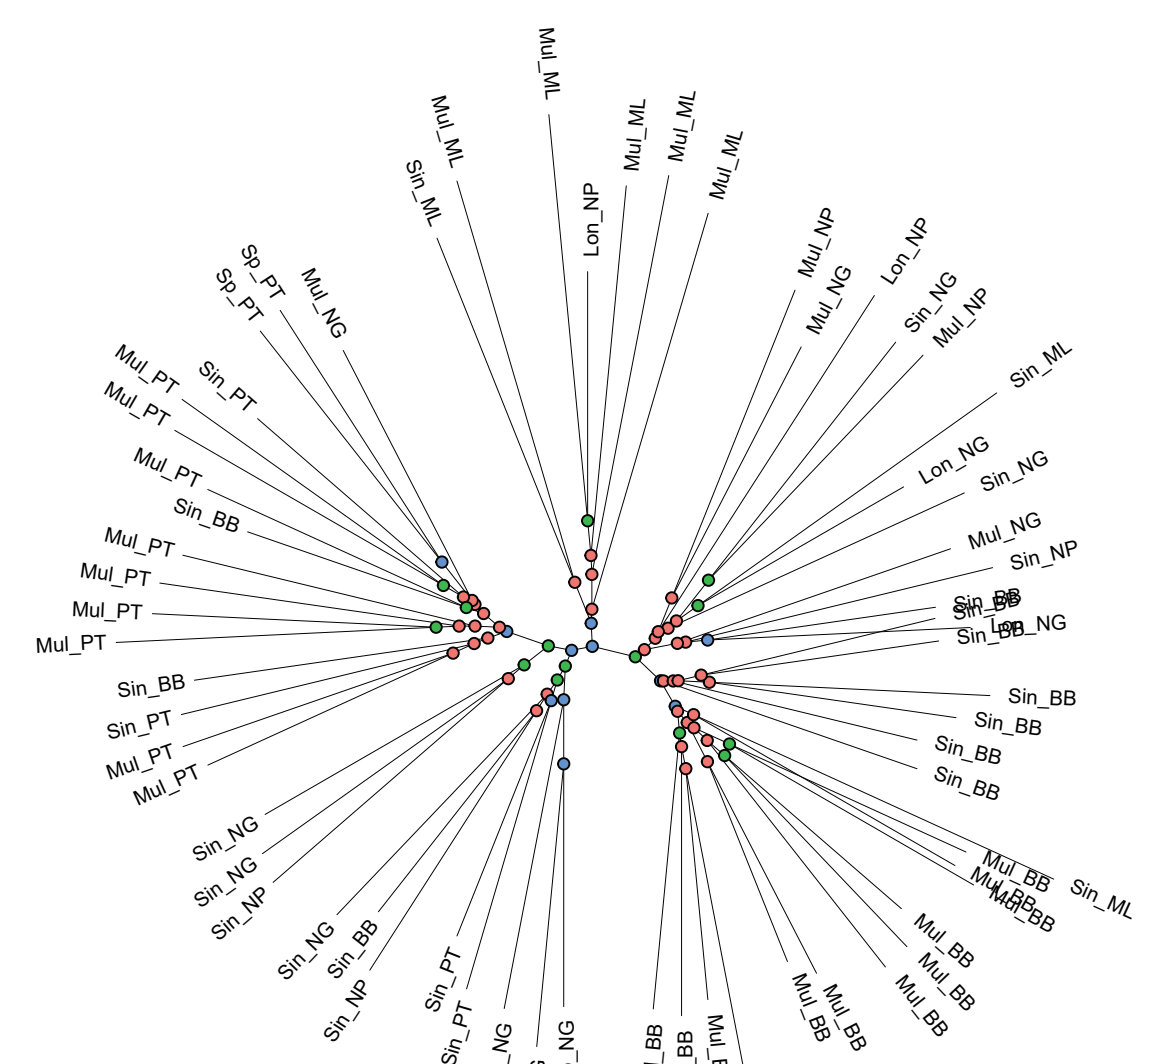

p1-r0.50 12,774

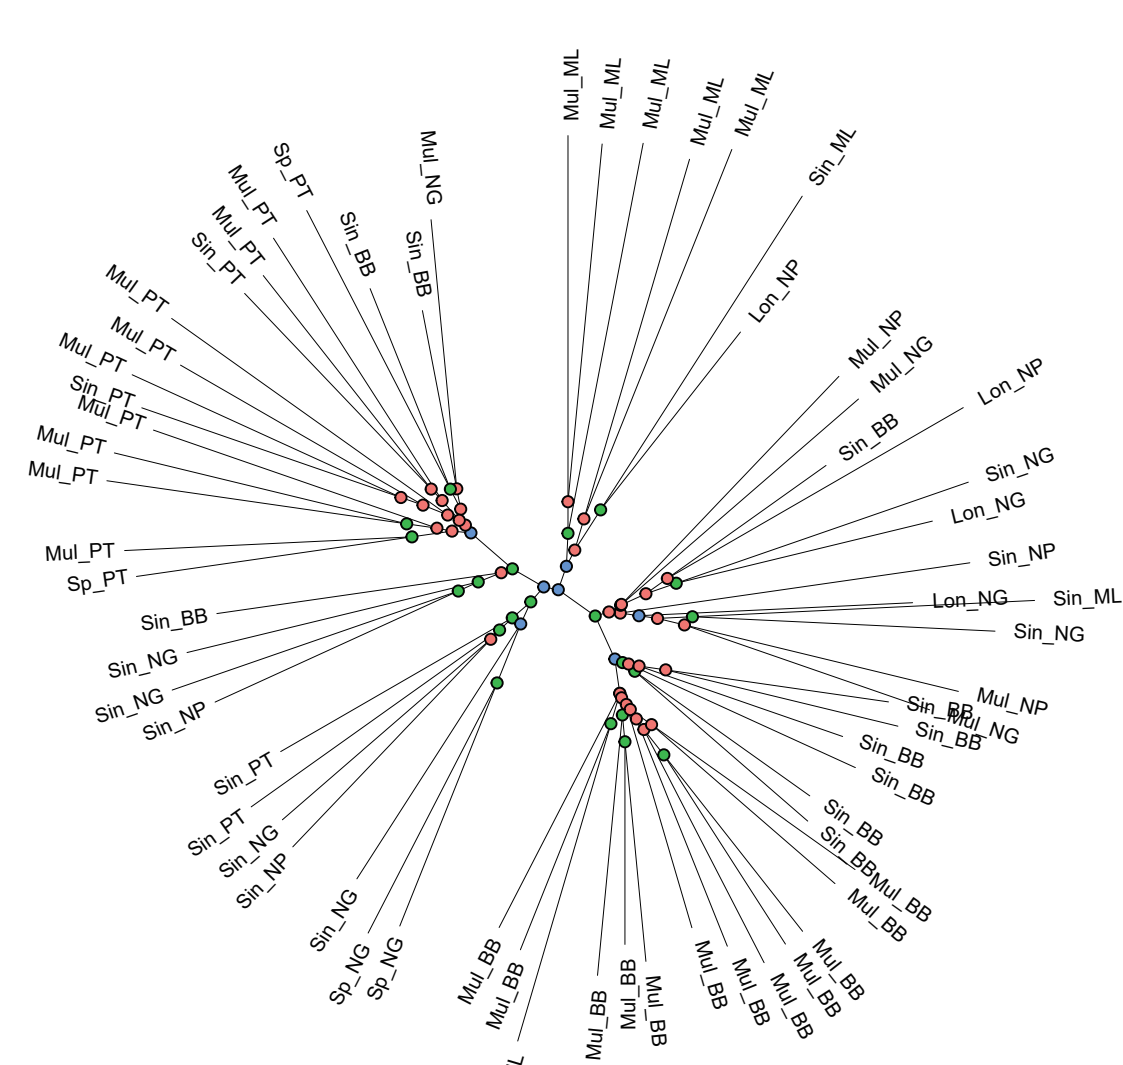

p1-r0.60 7,771

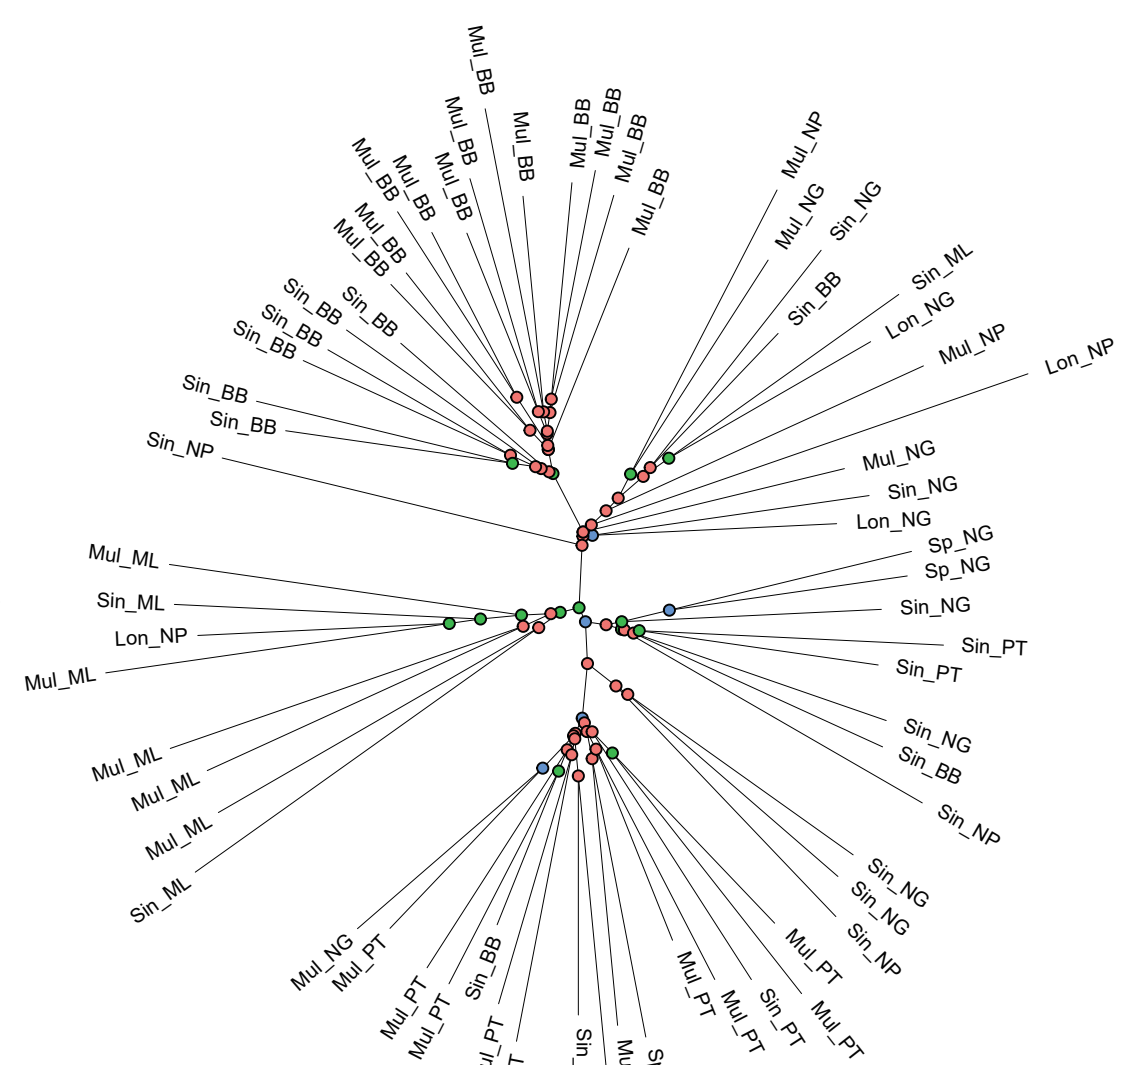

p1-r0.70 4,671

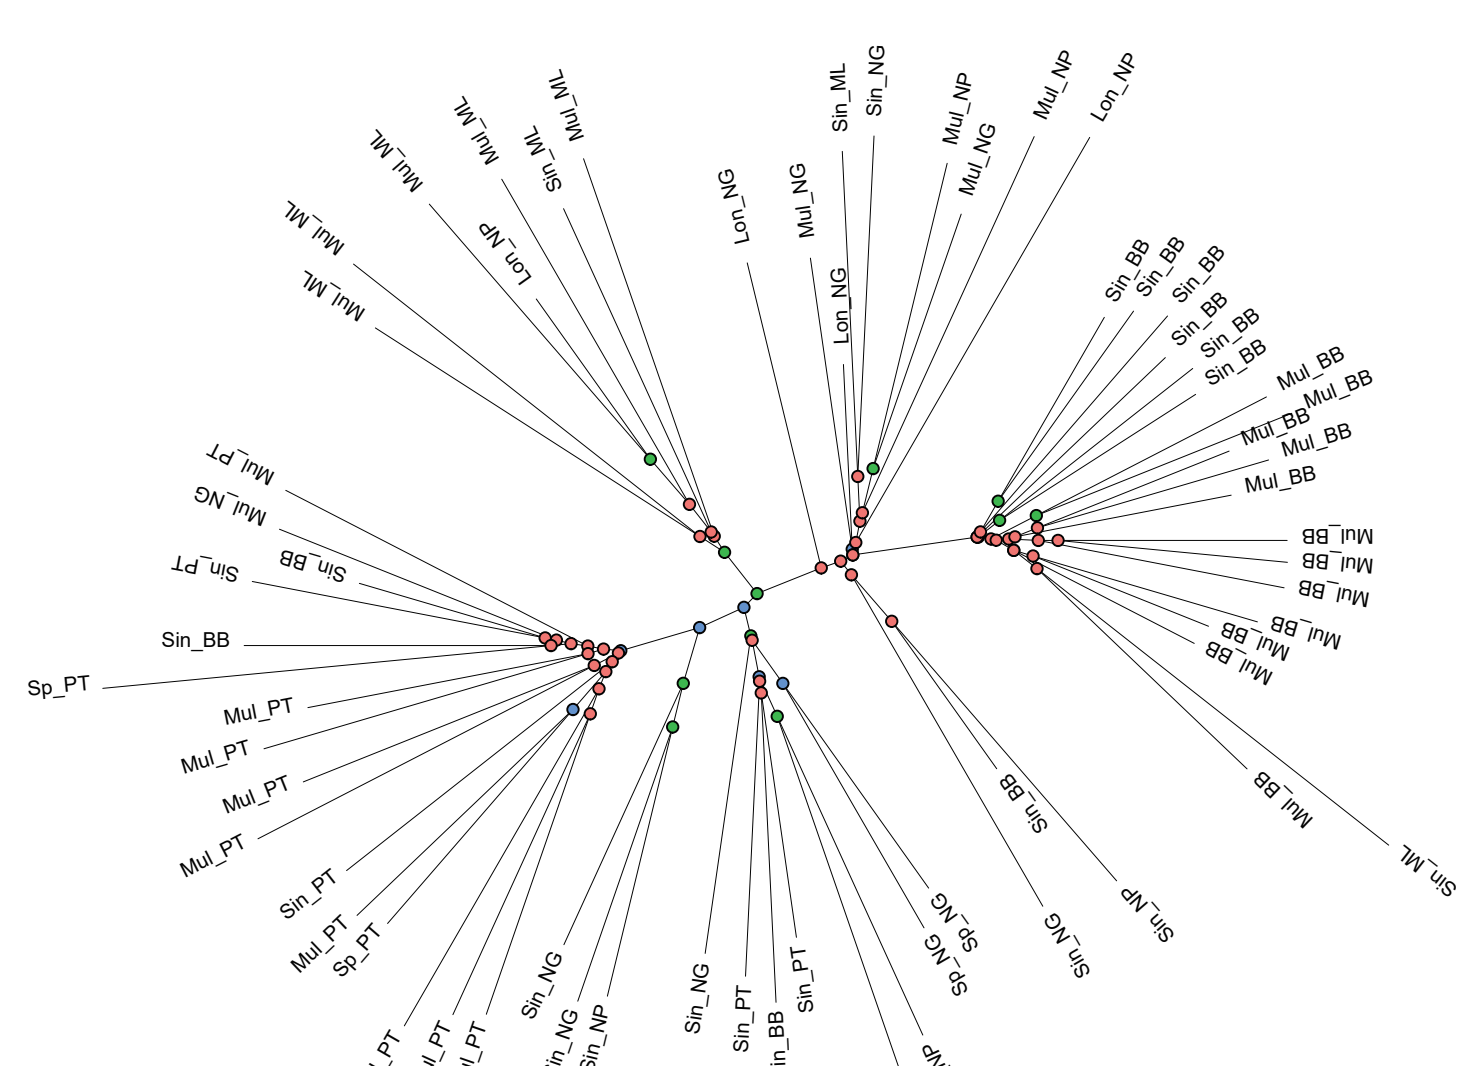

p1-r0.80 2,688

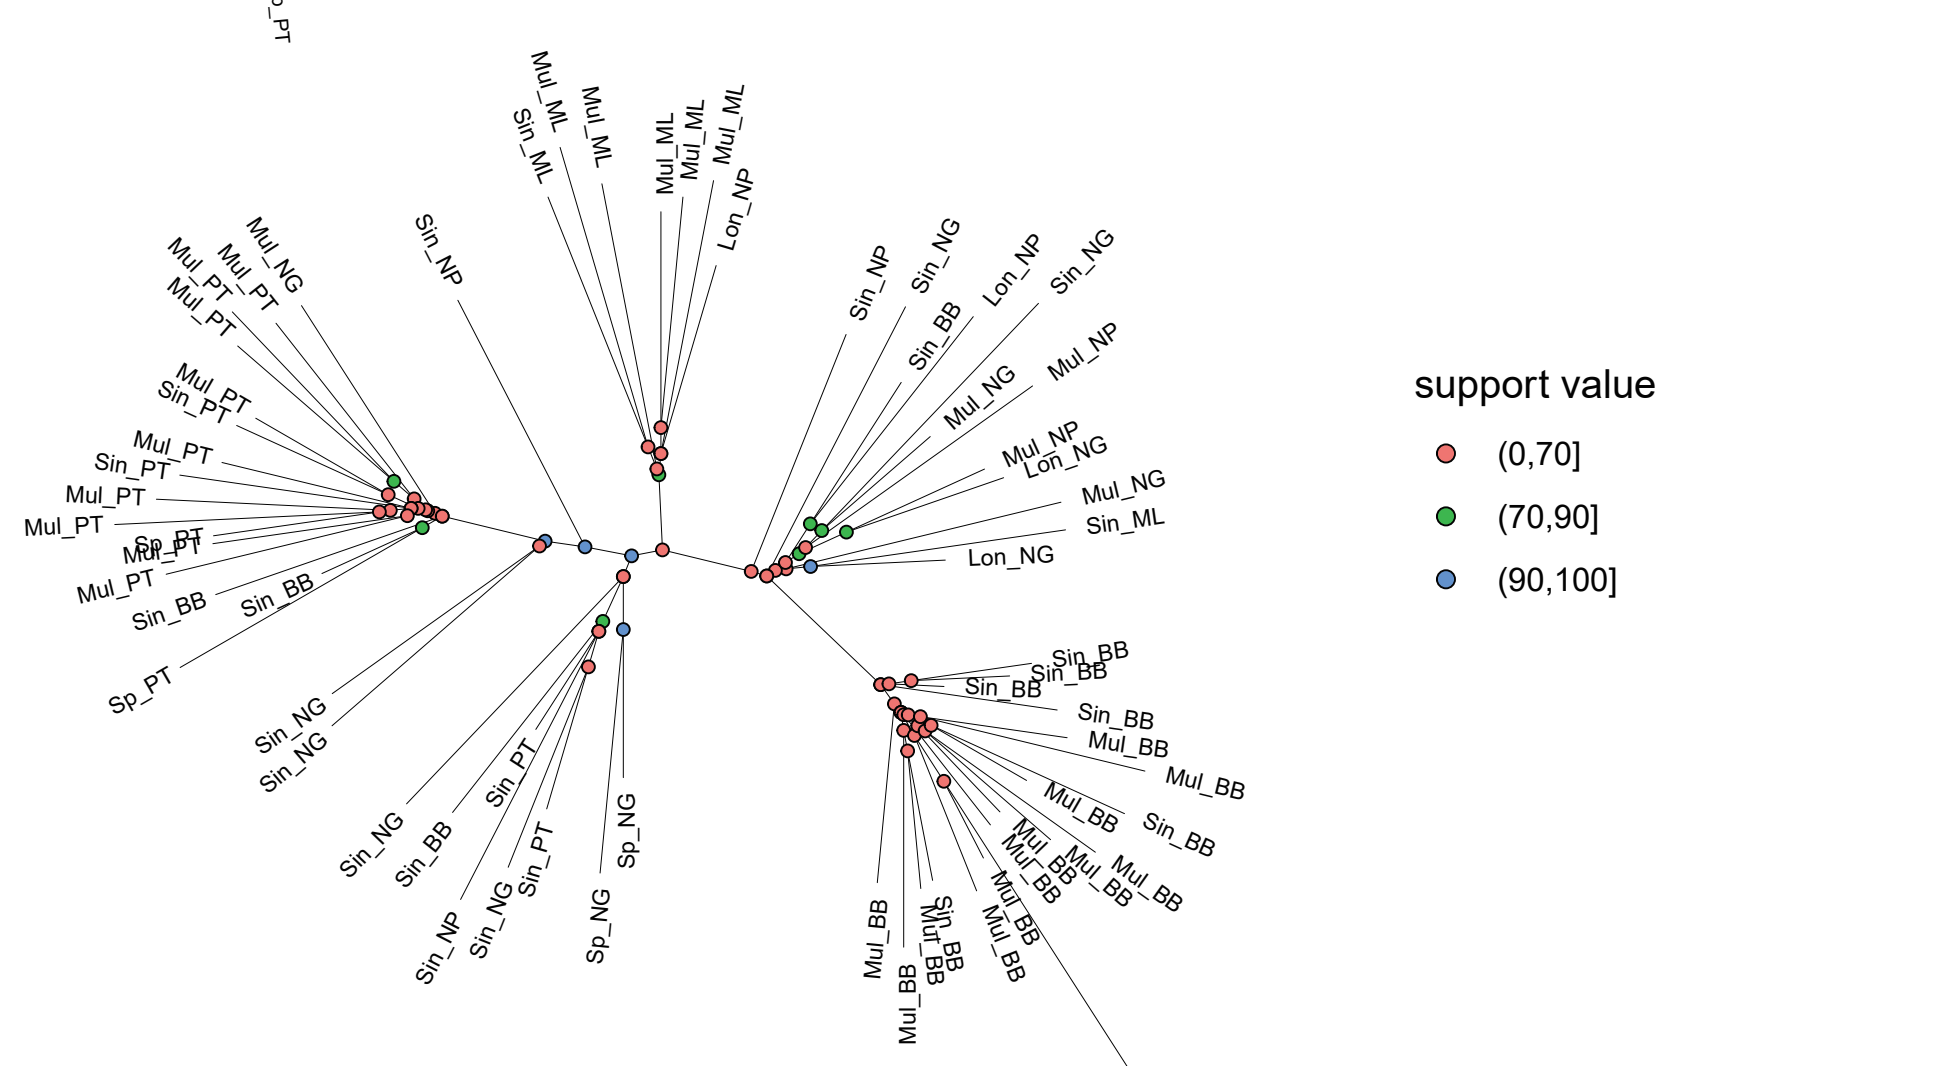

p1-r0.90 1,143

support value

- (0,70]
- (70,90]
- (90,100]



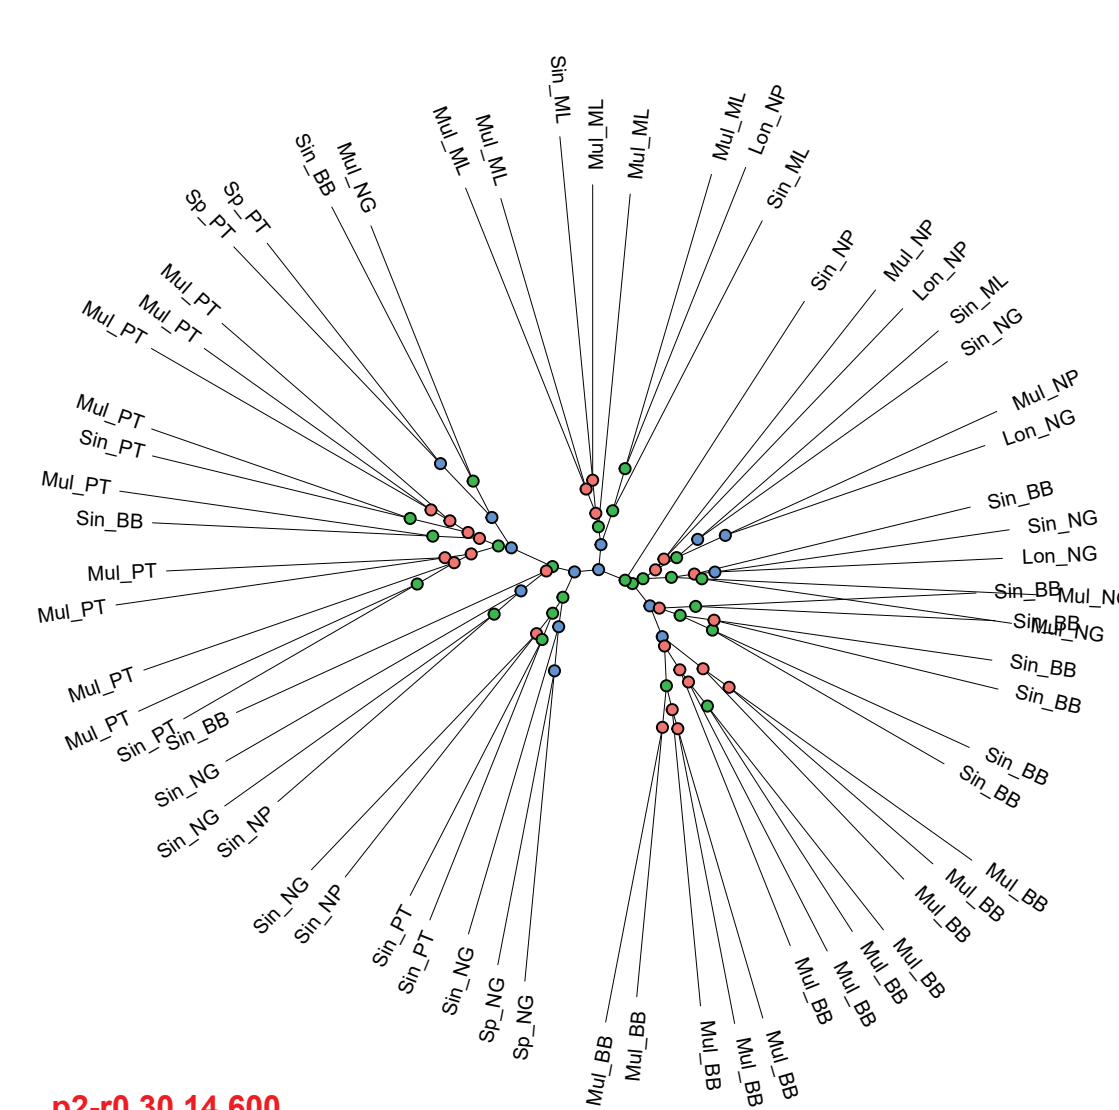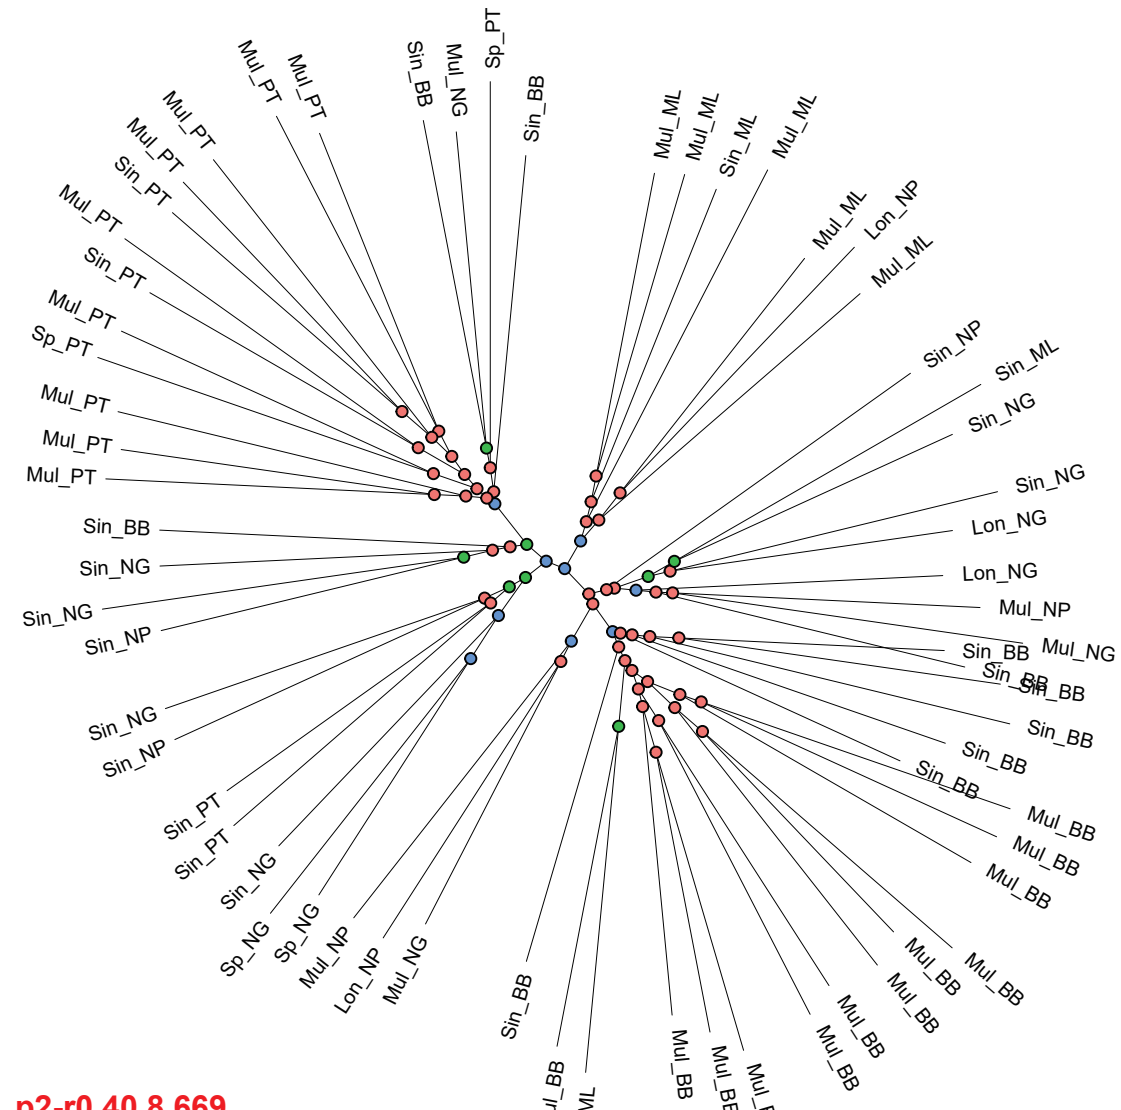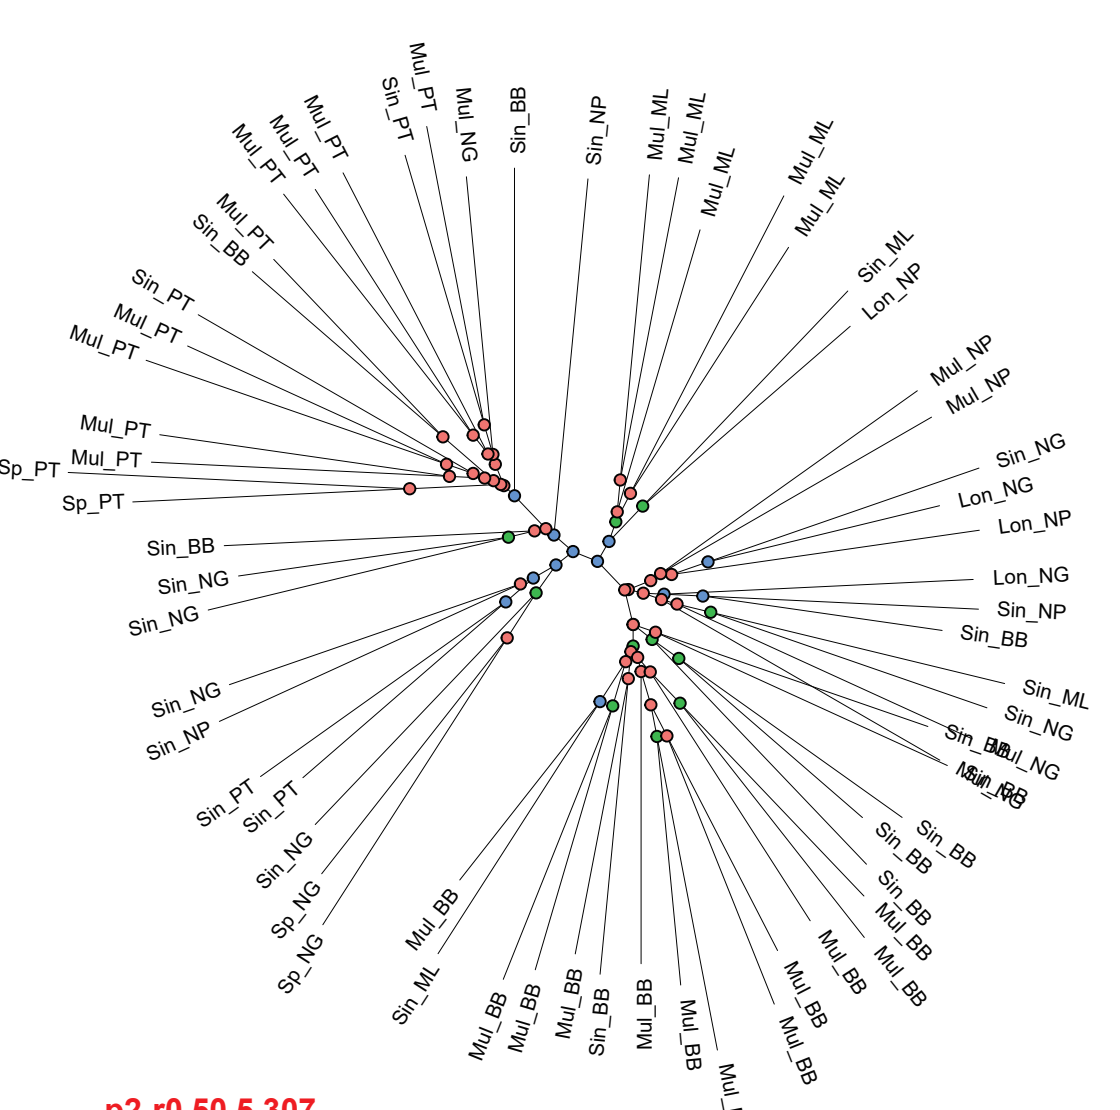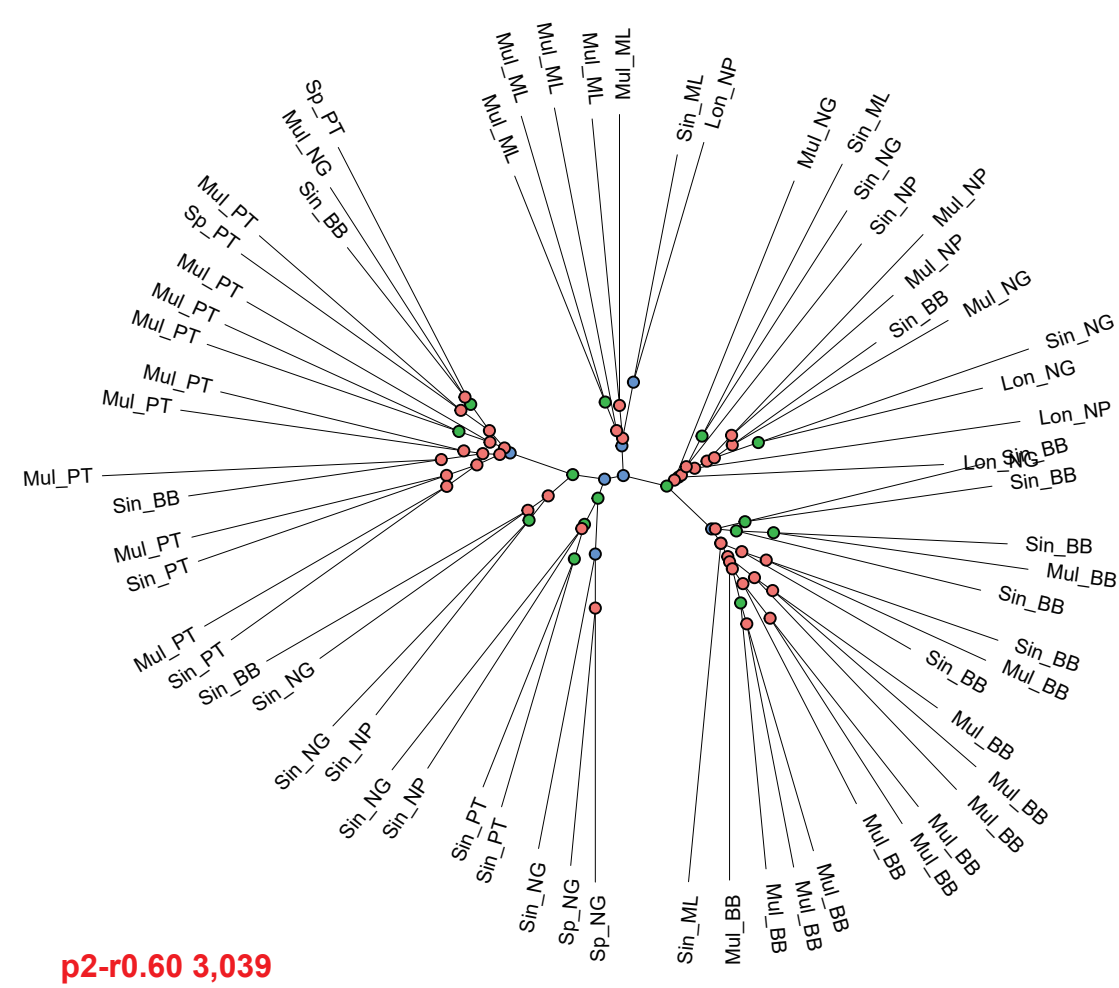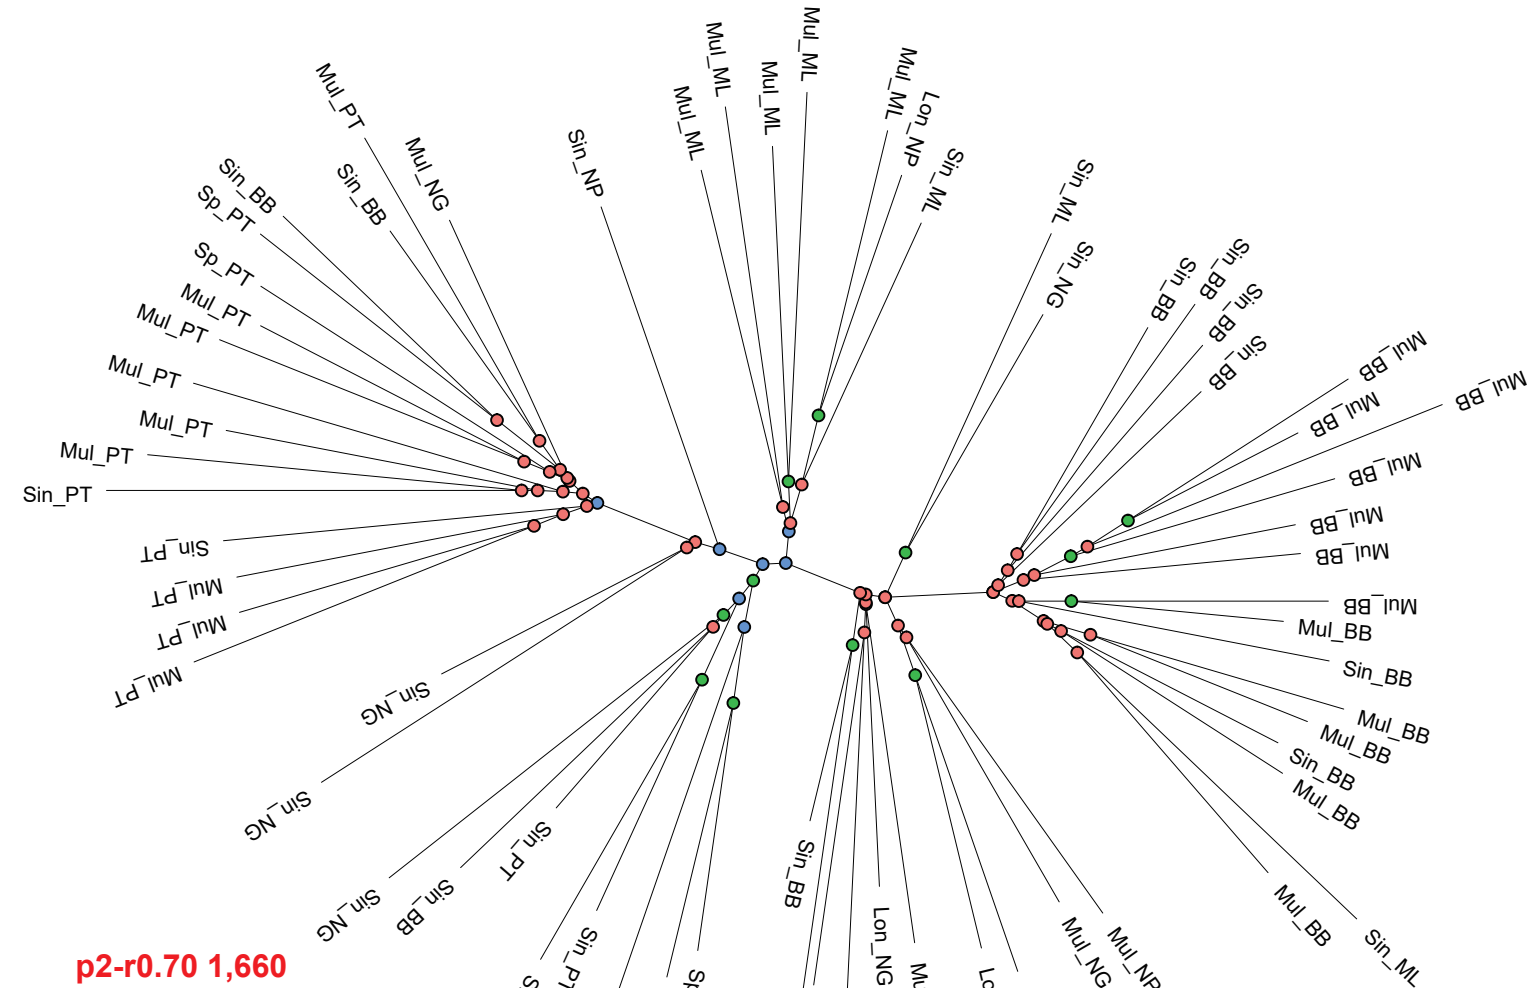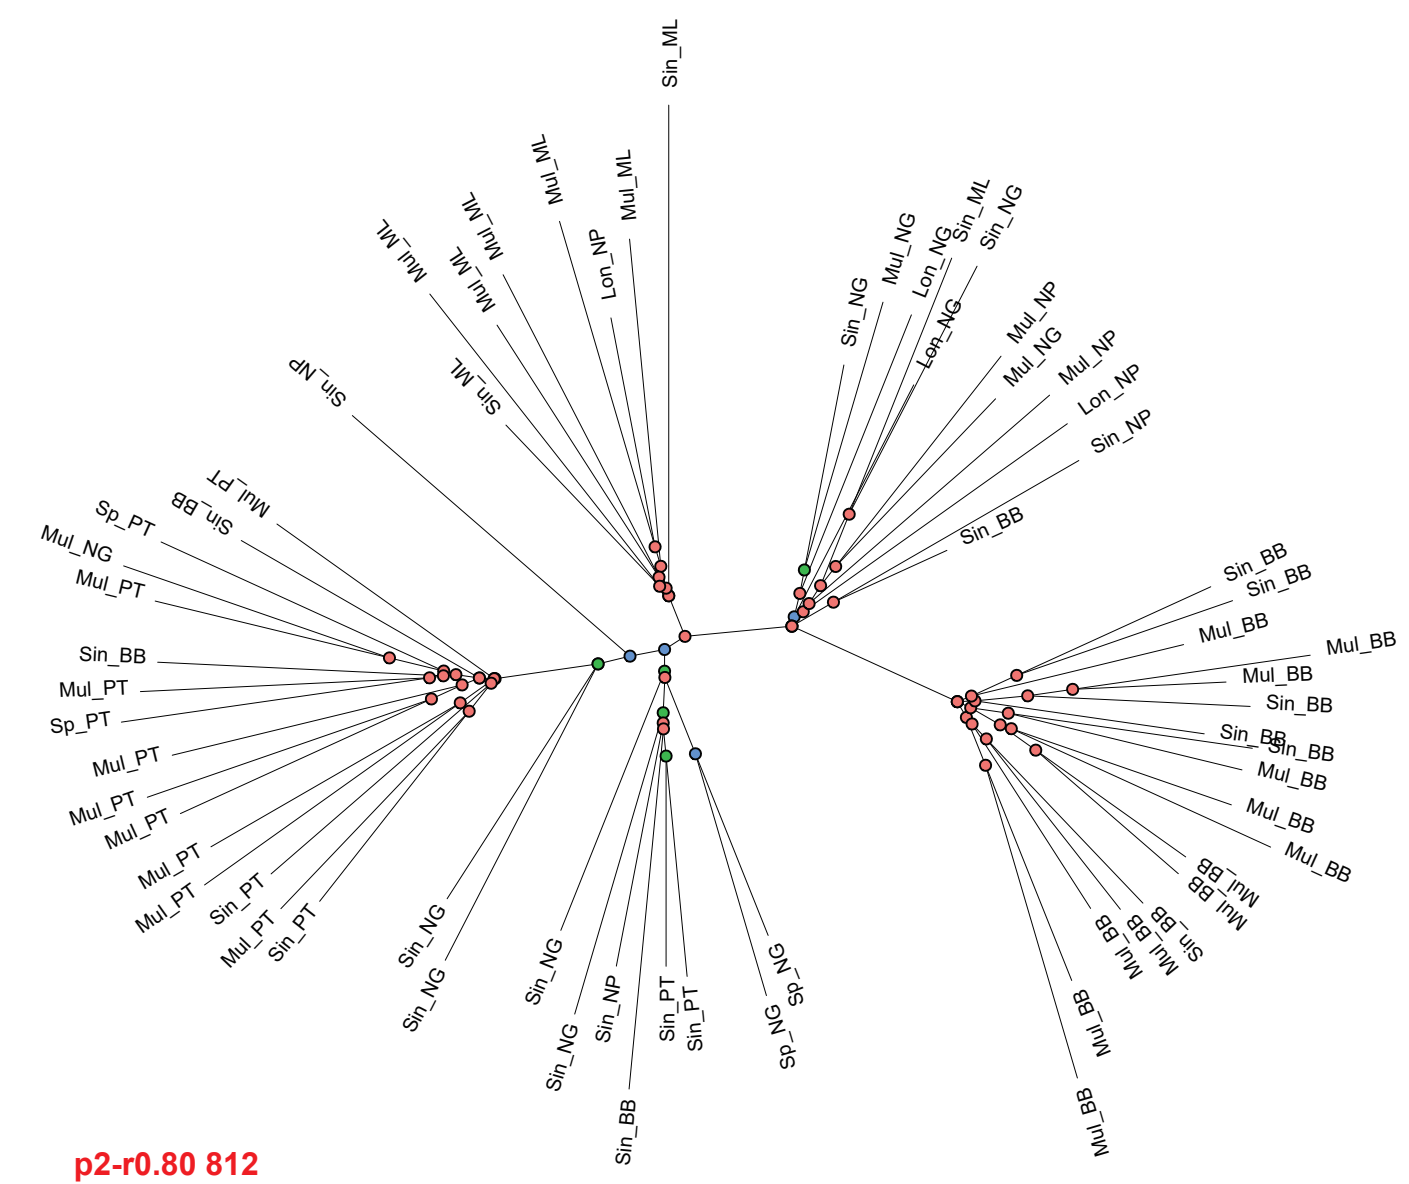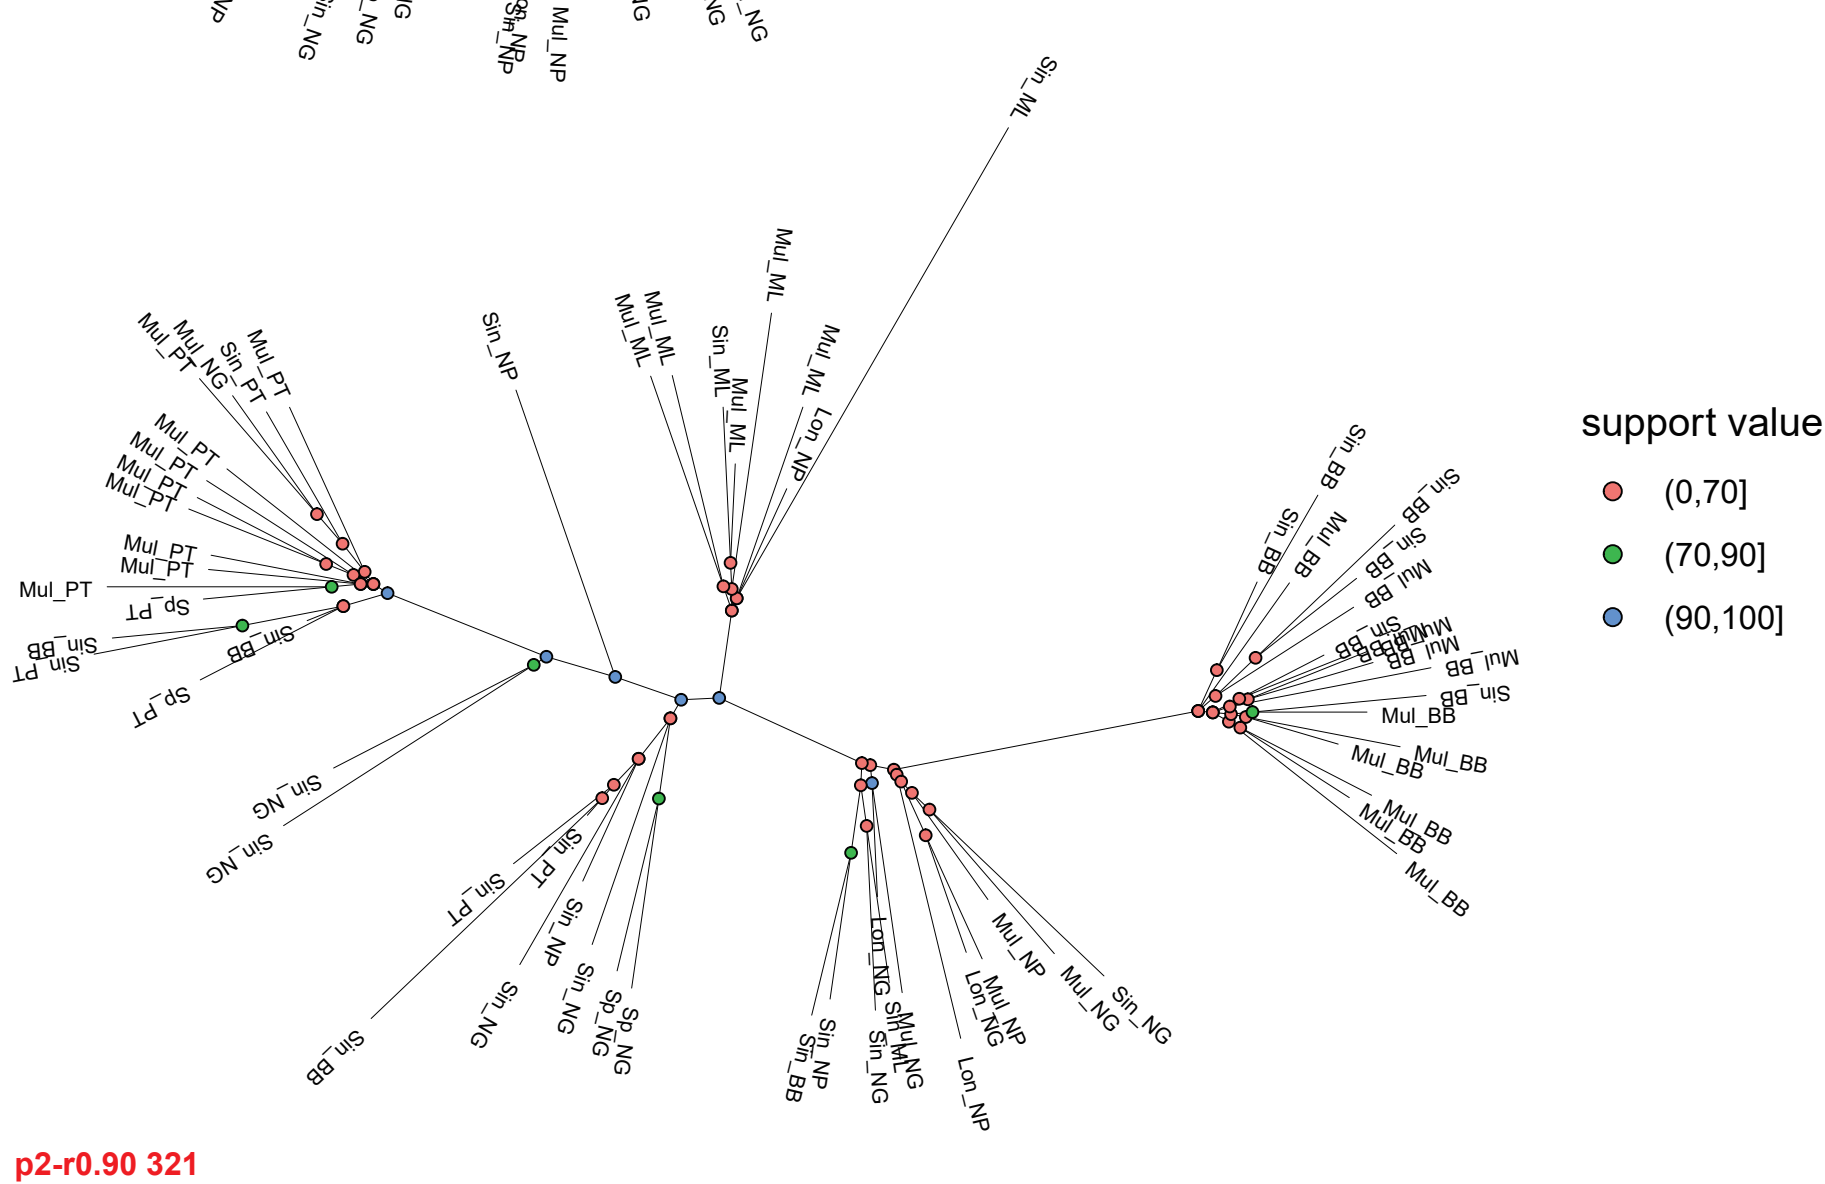

support value

- $(0,70]$

- $(70,90]$

- $(90, 100]$



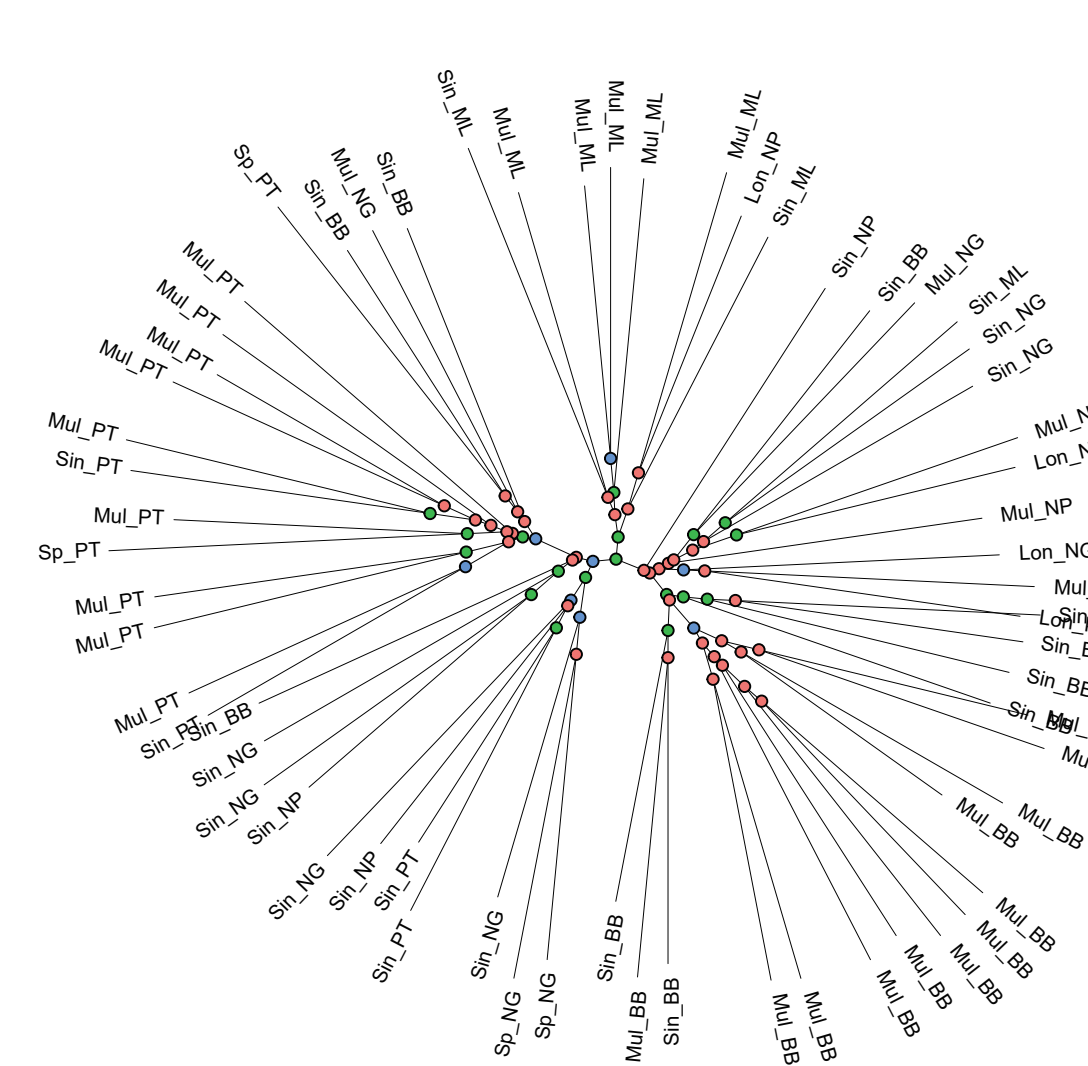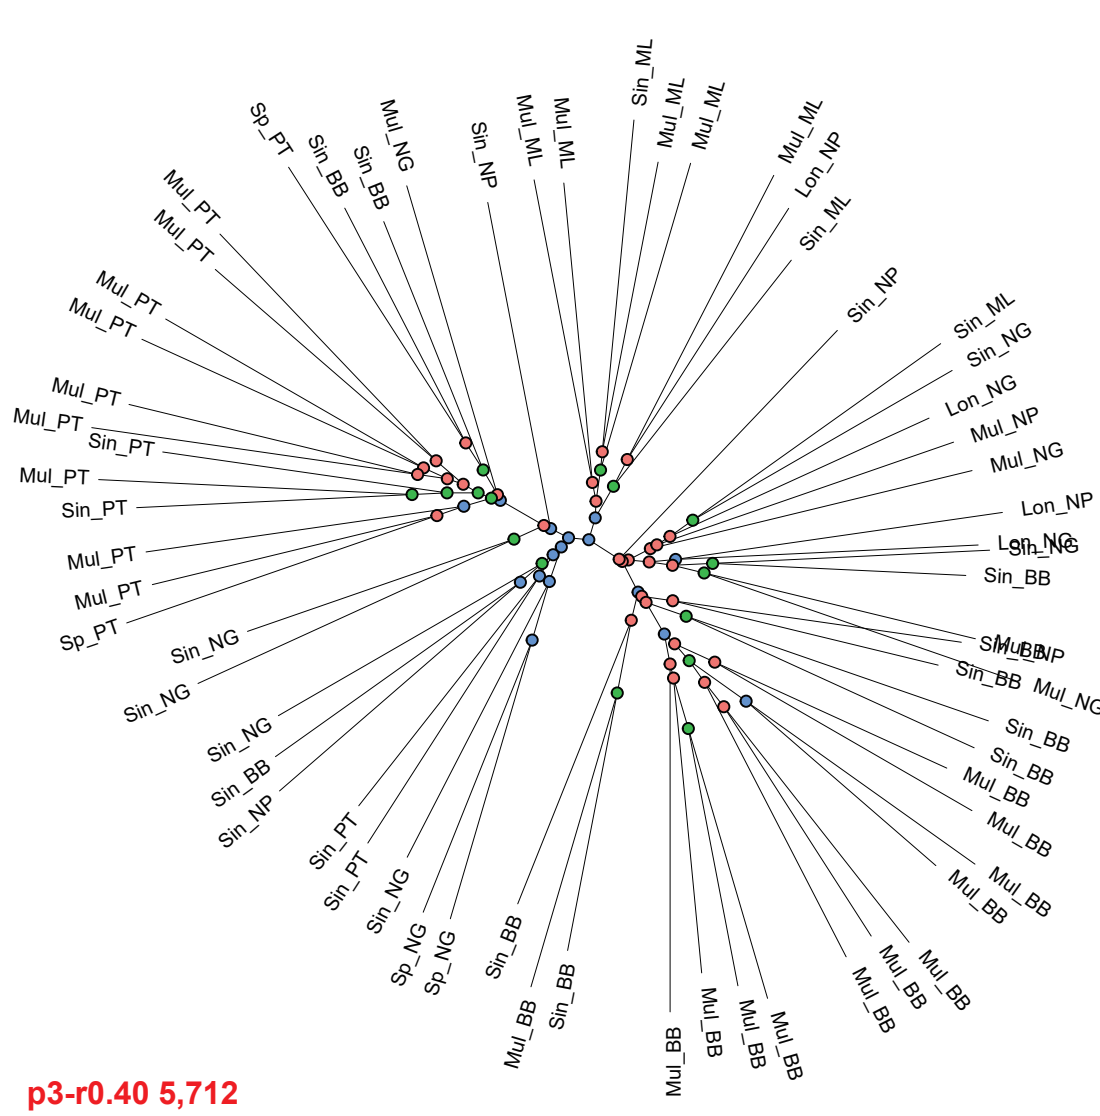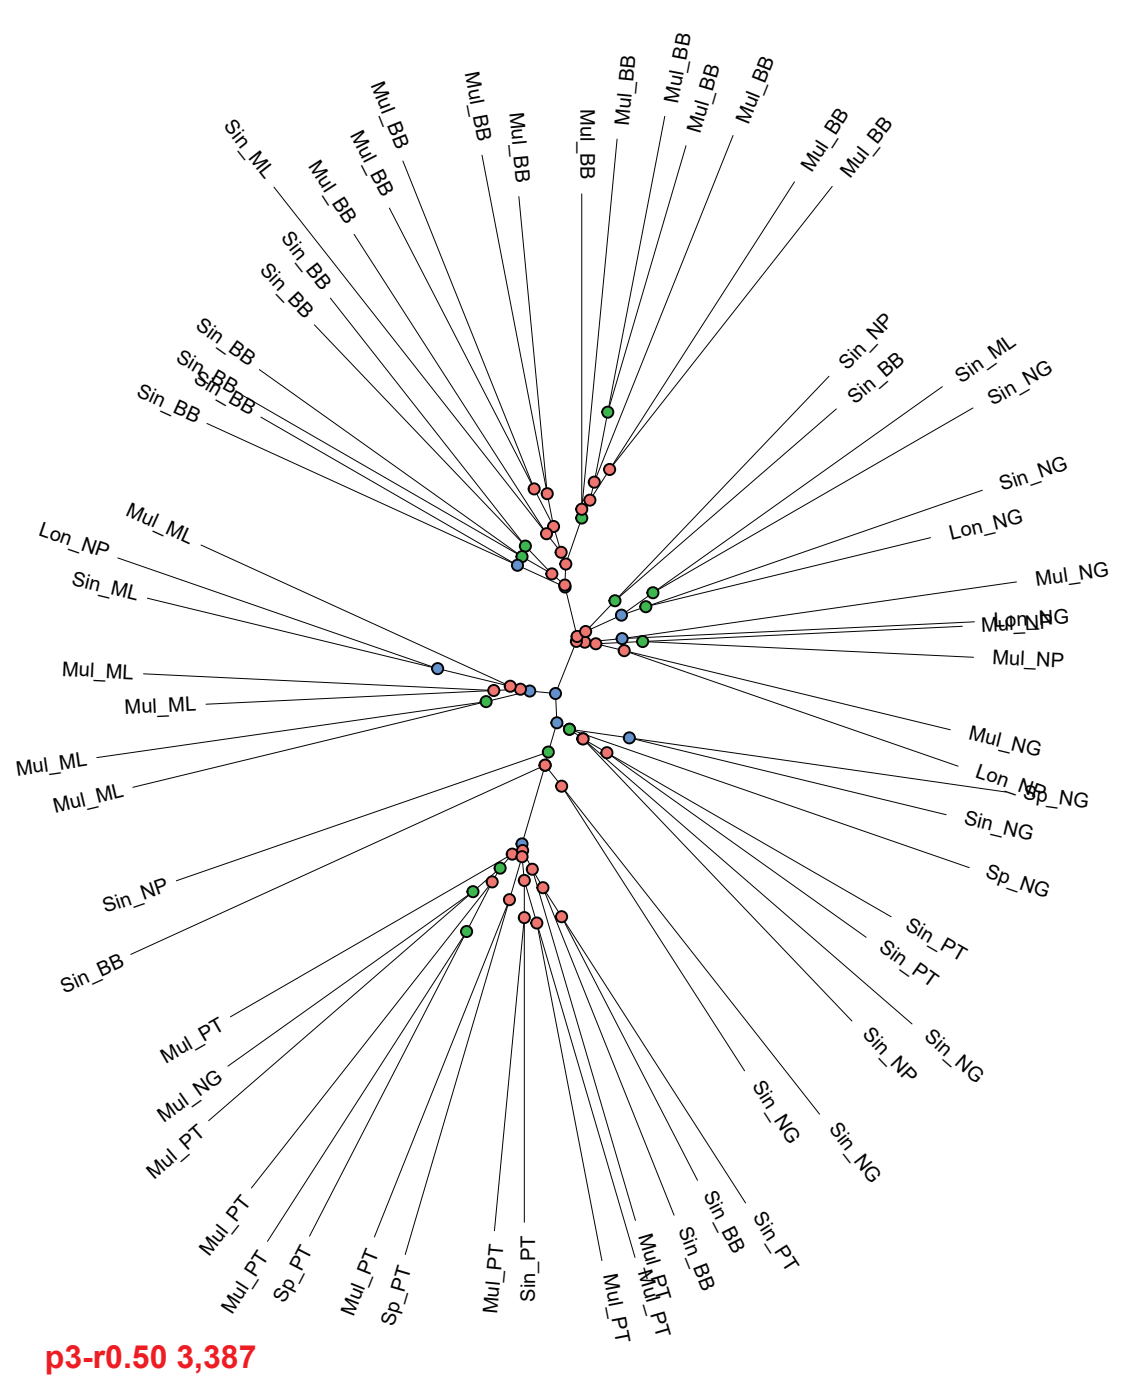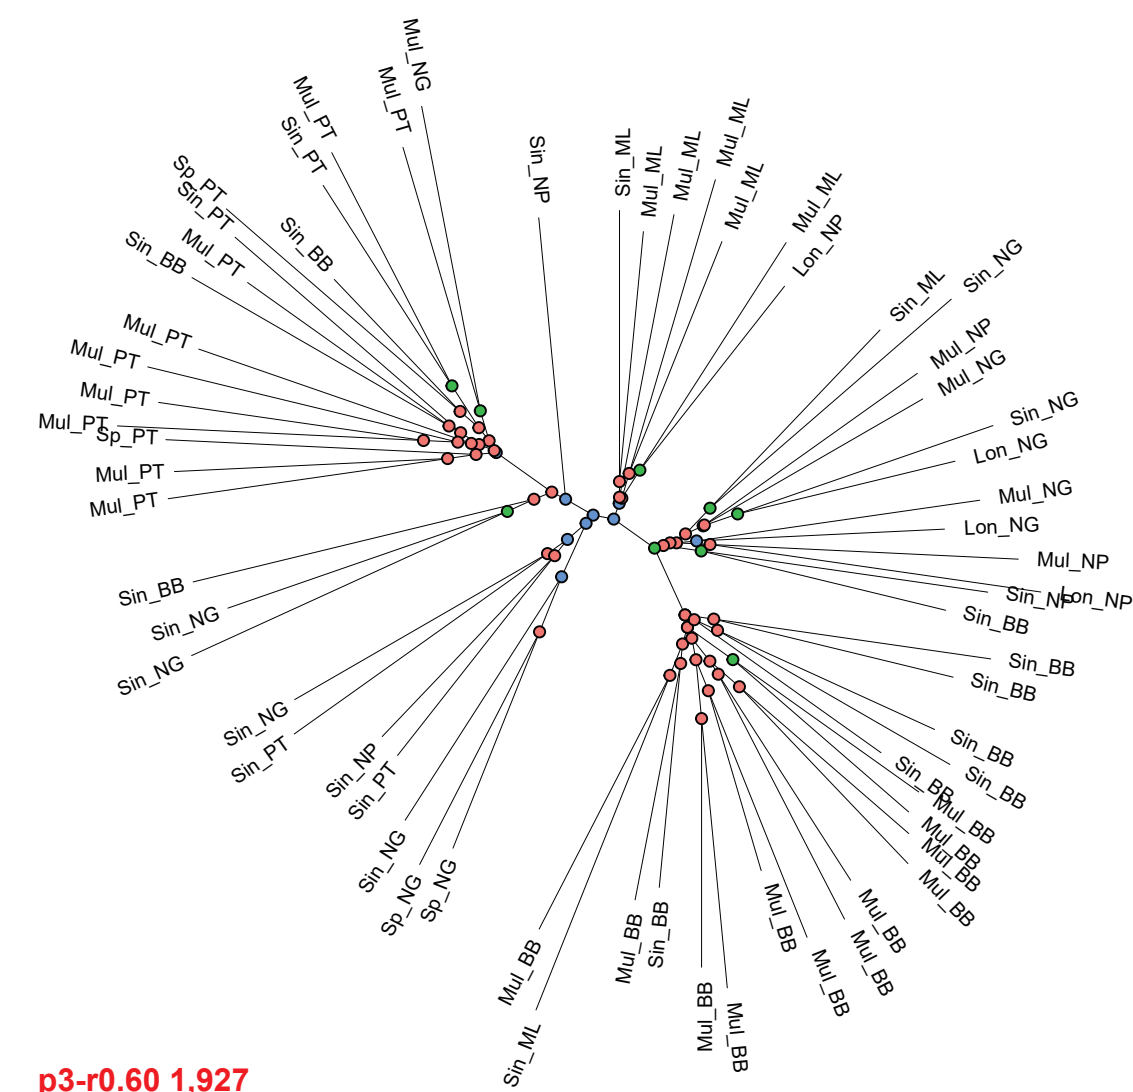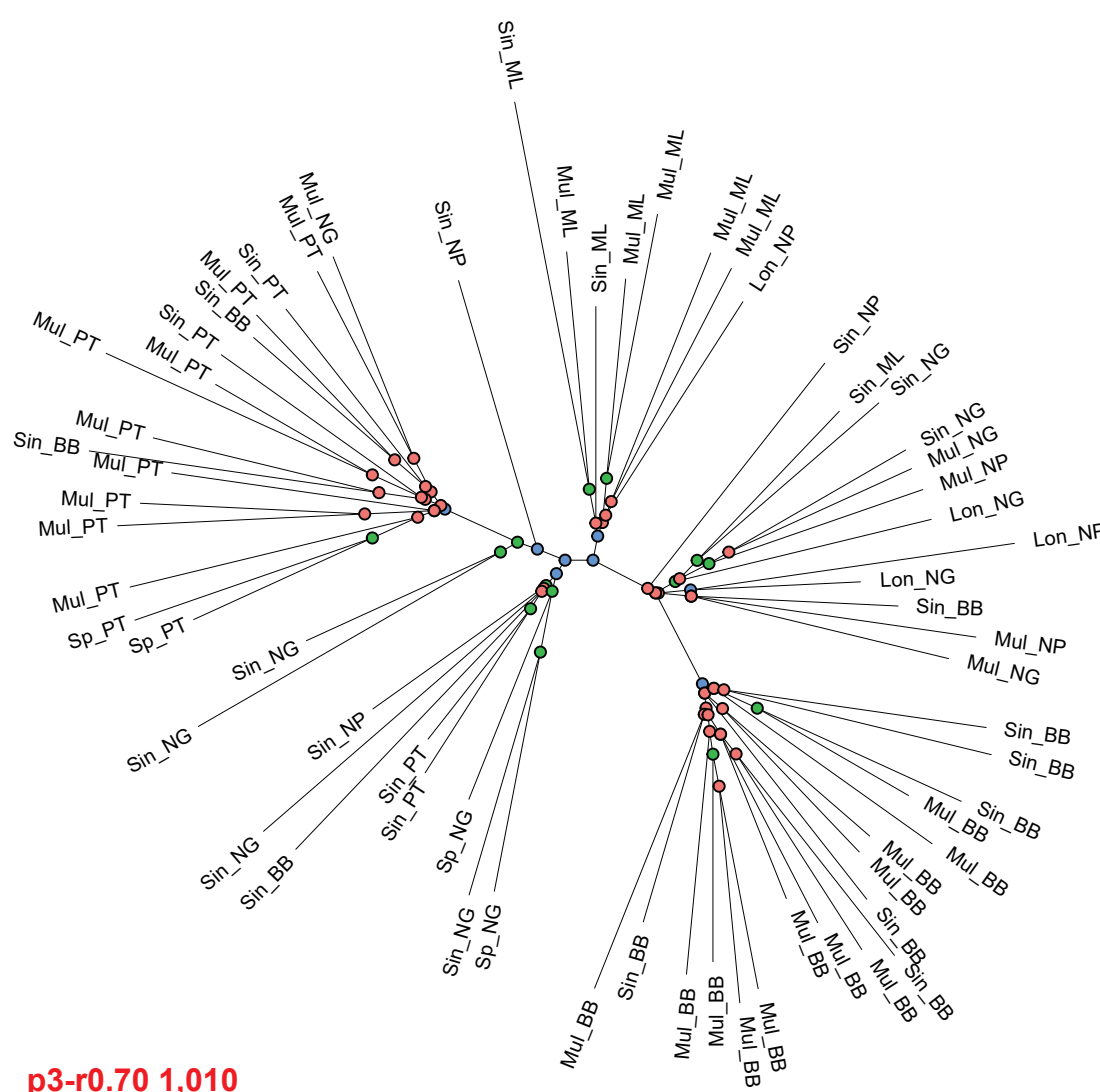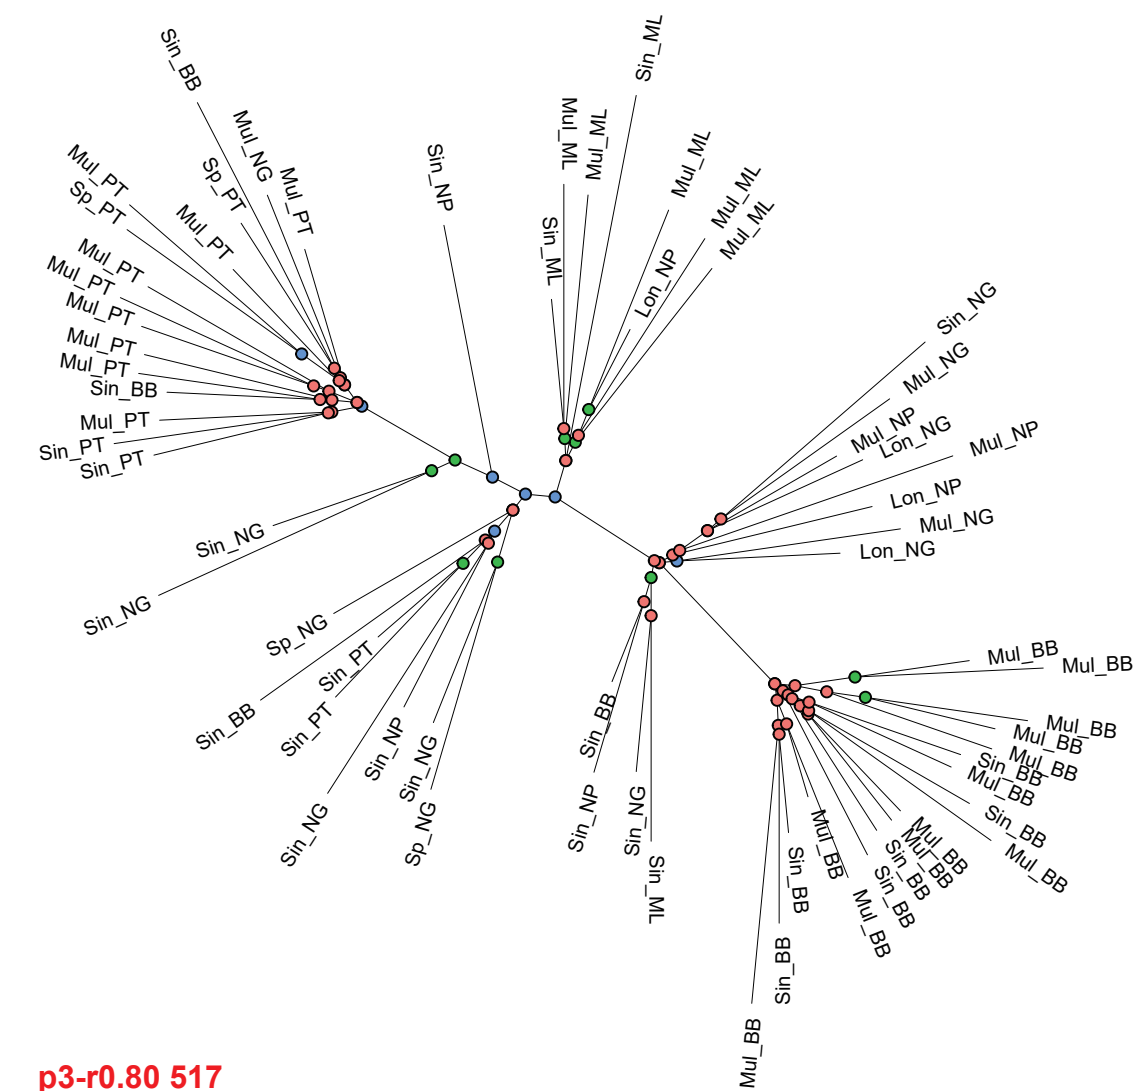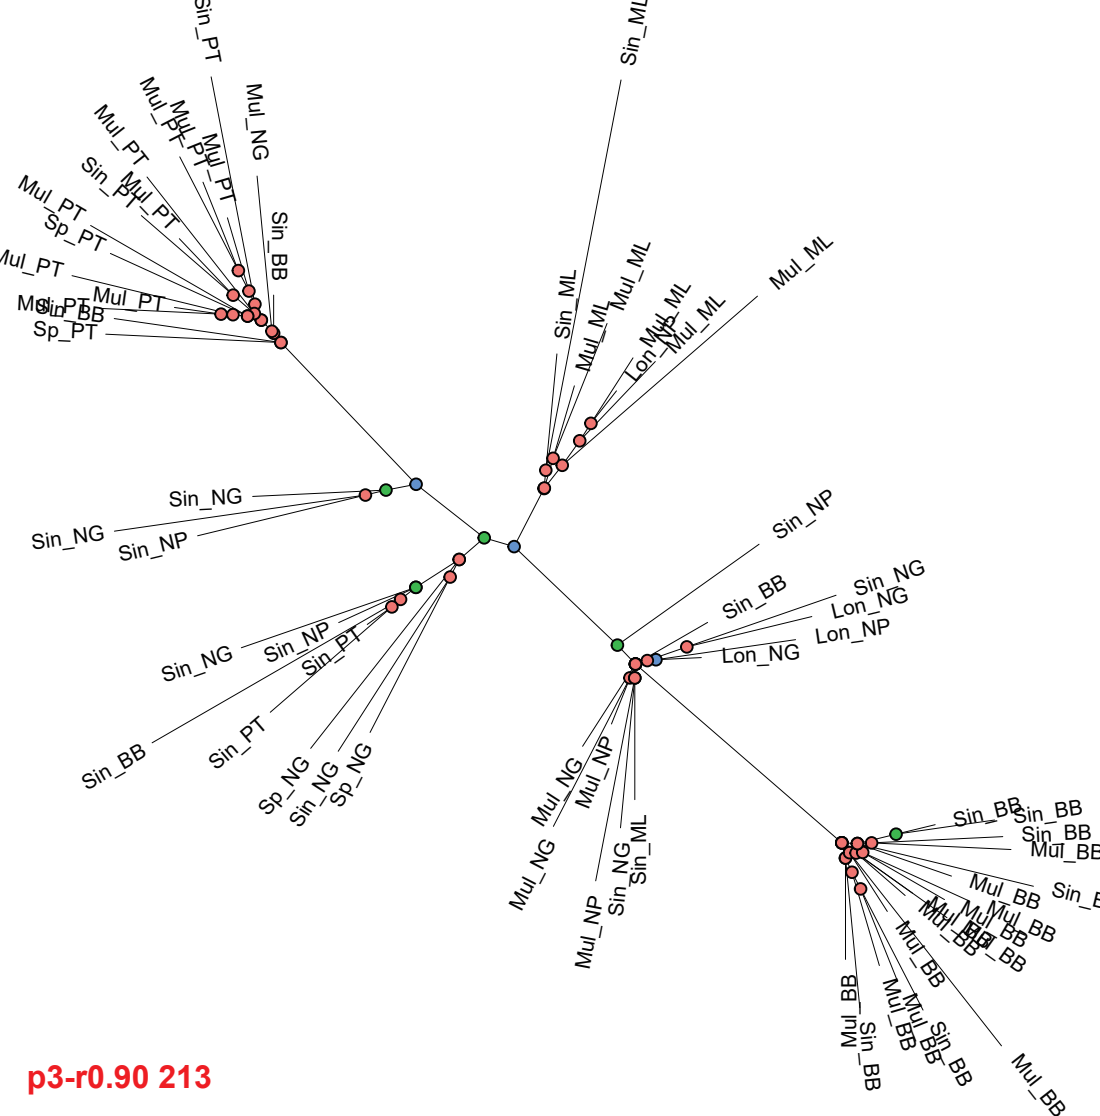

support value

- $(0,70]$

- (70,90]

- $(90, 100]$



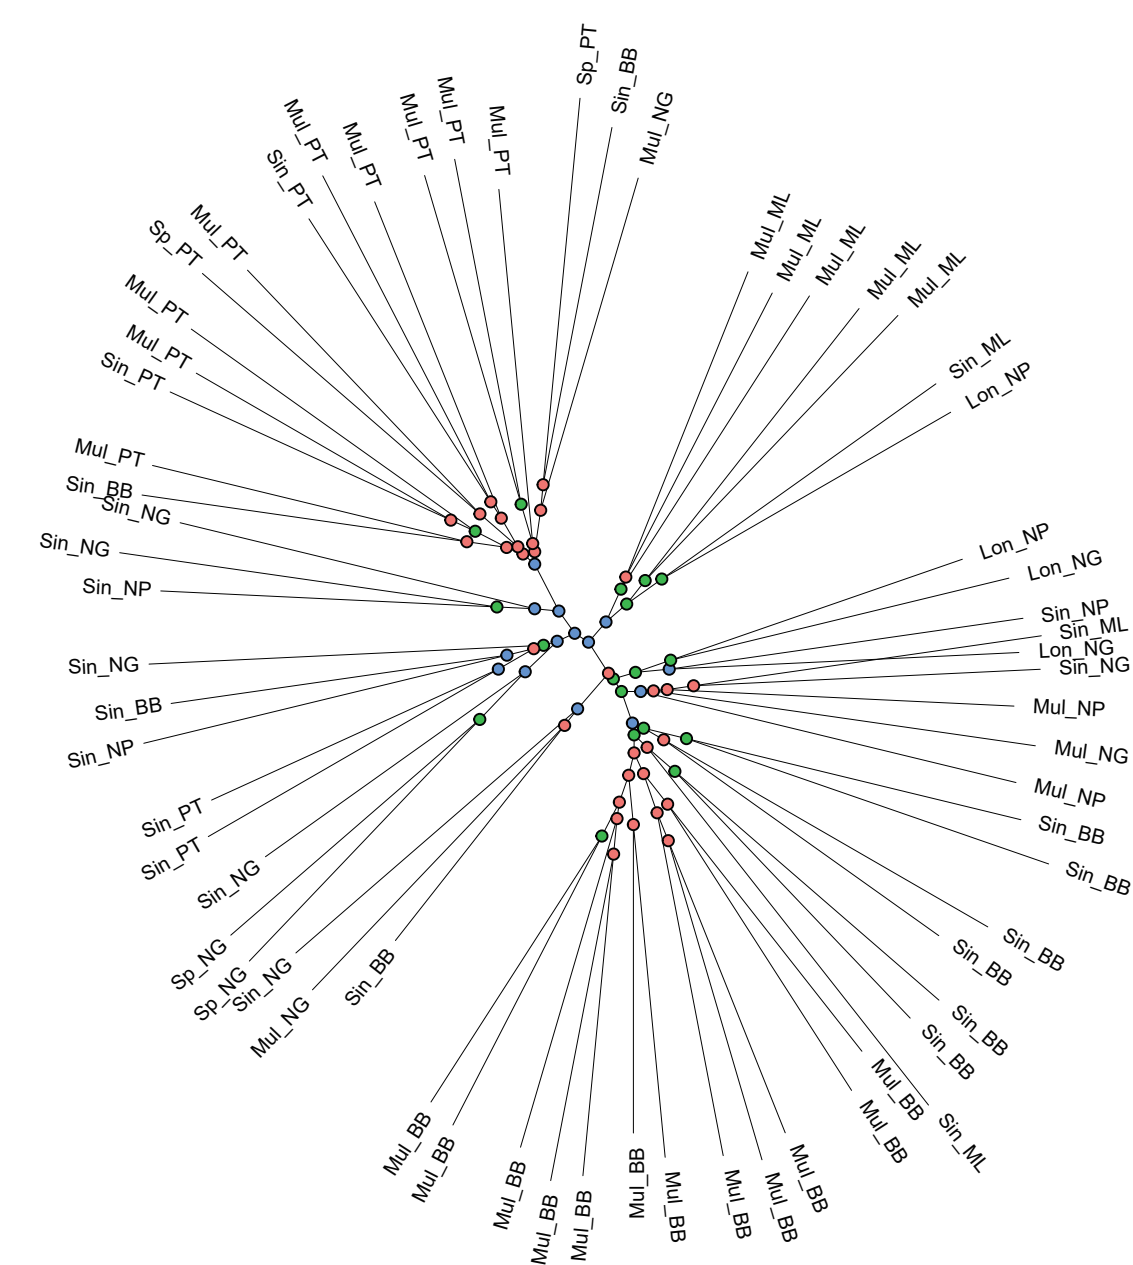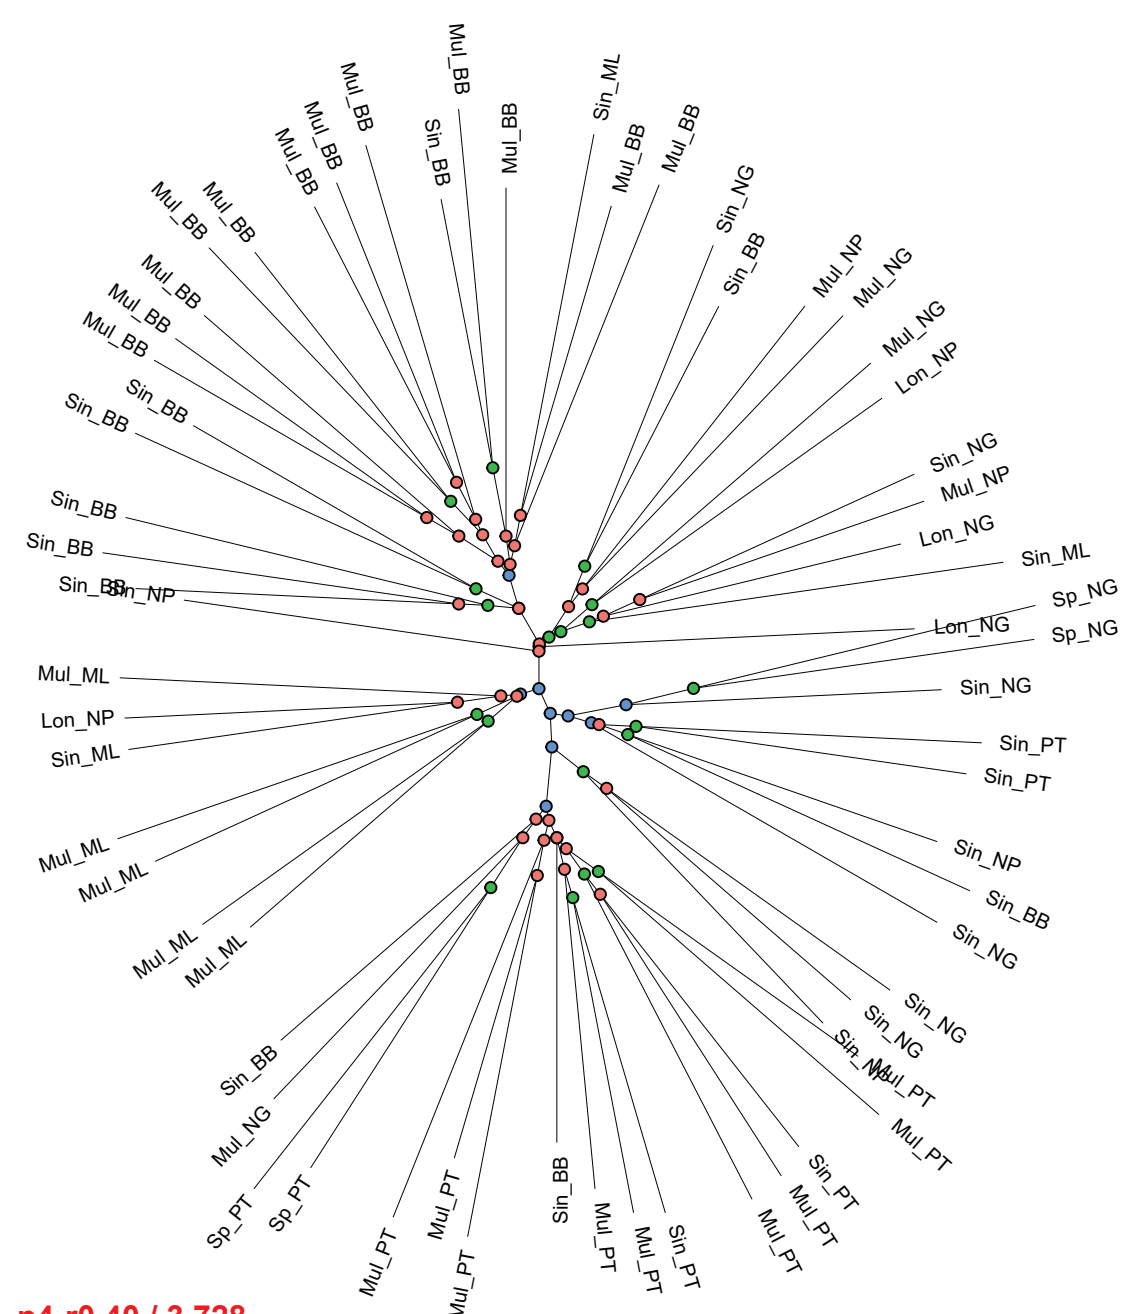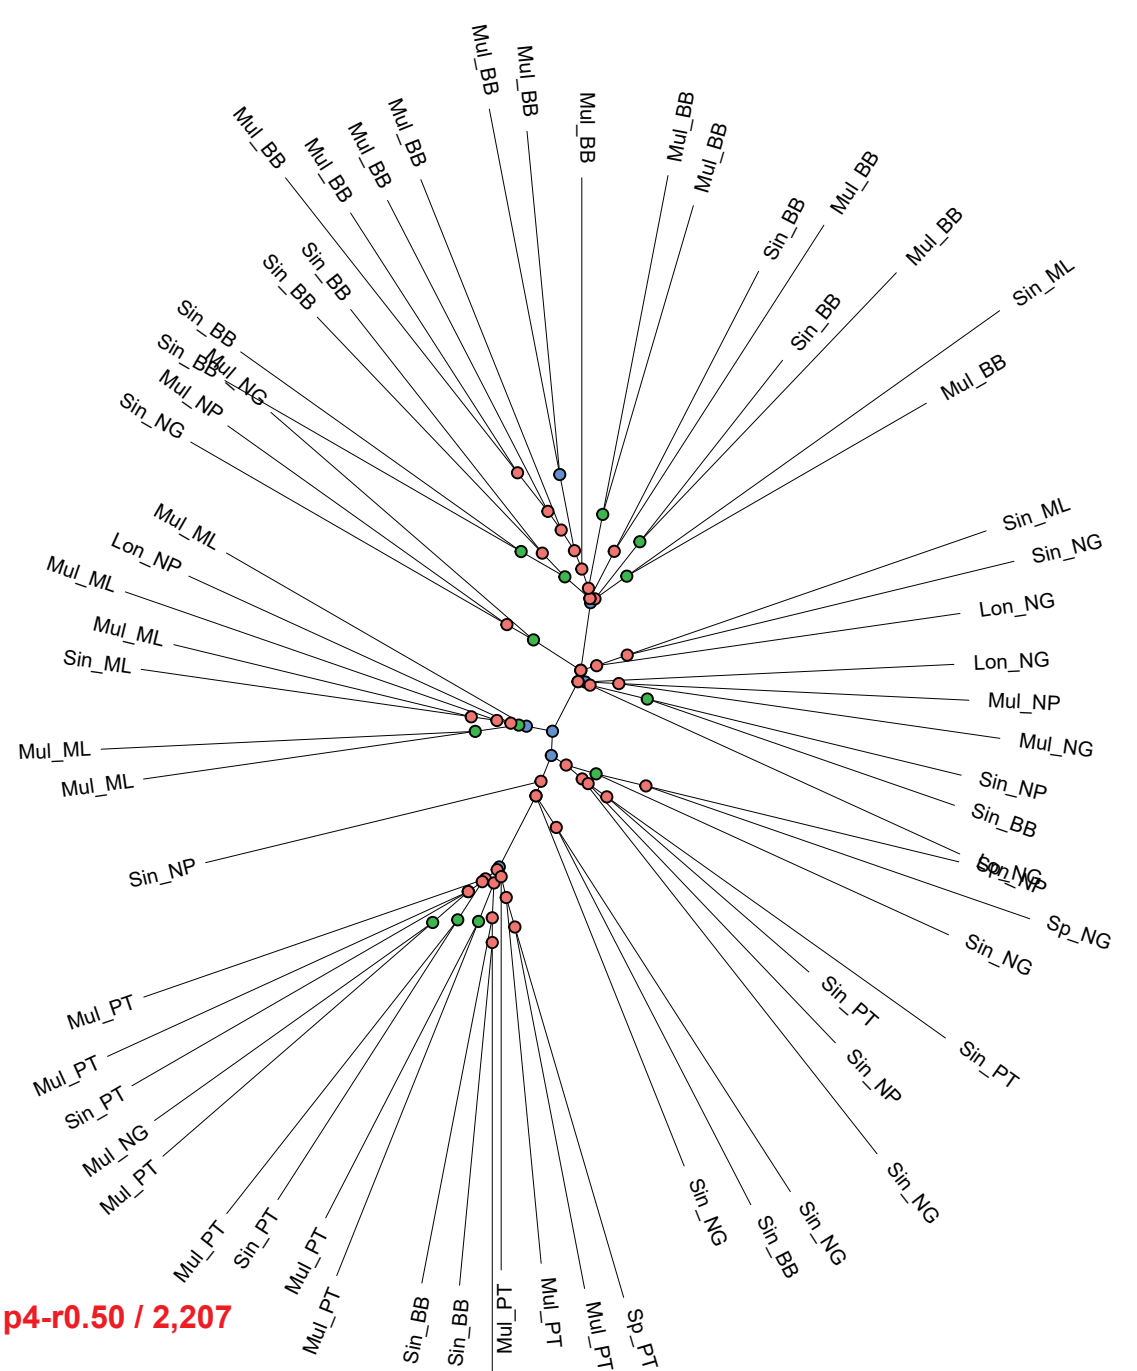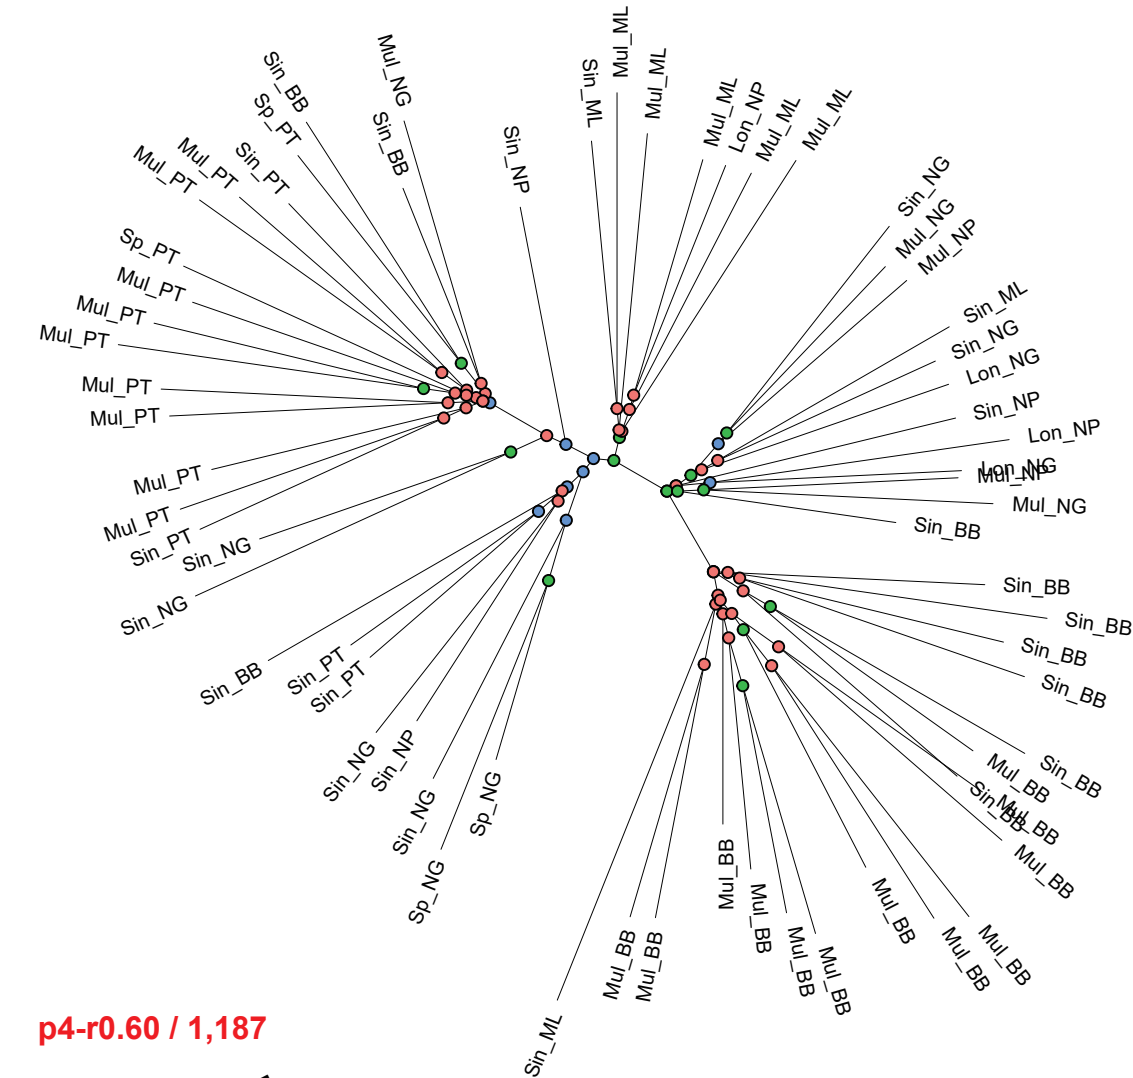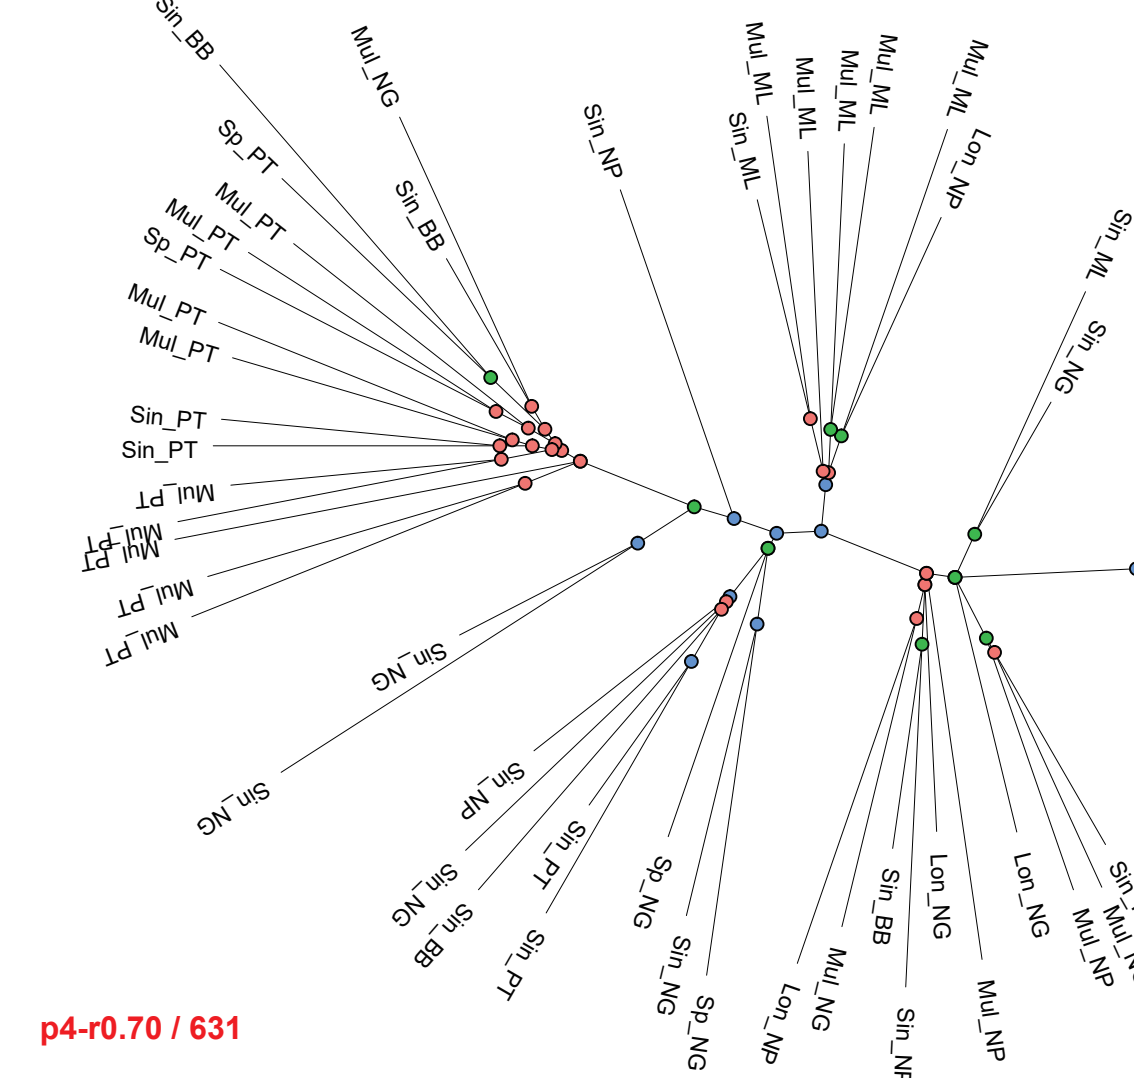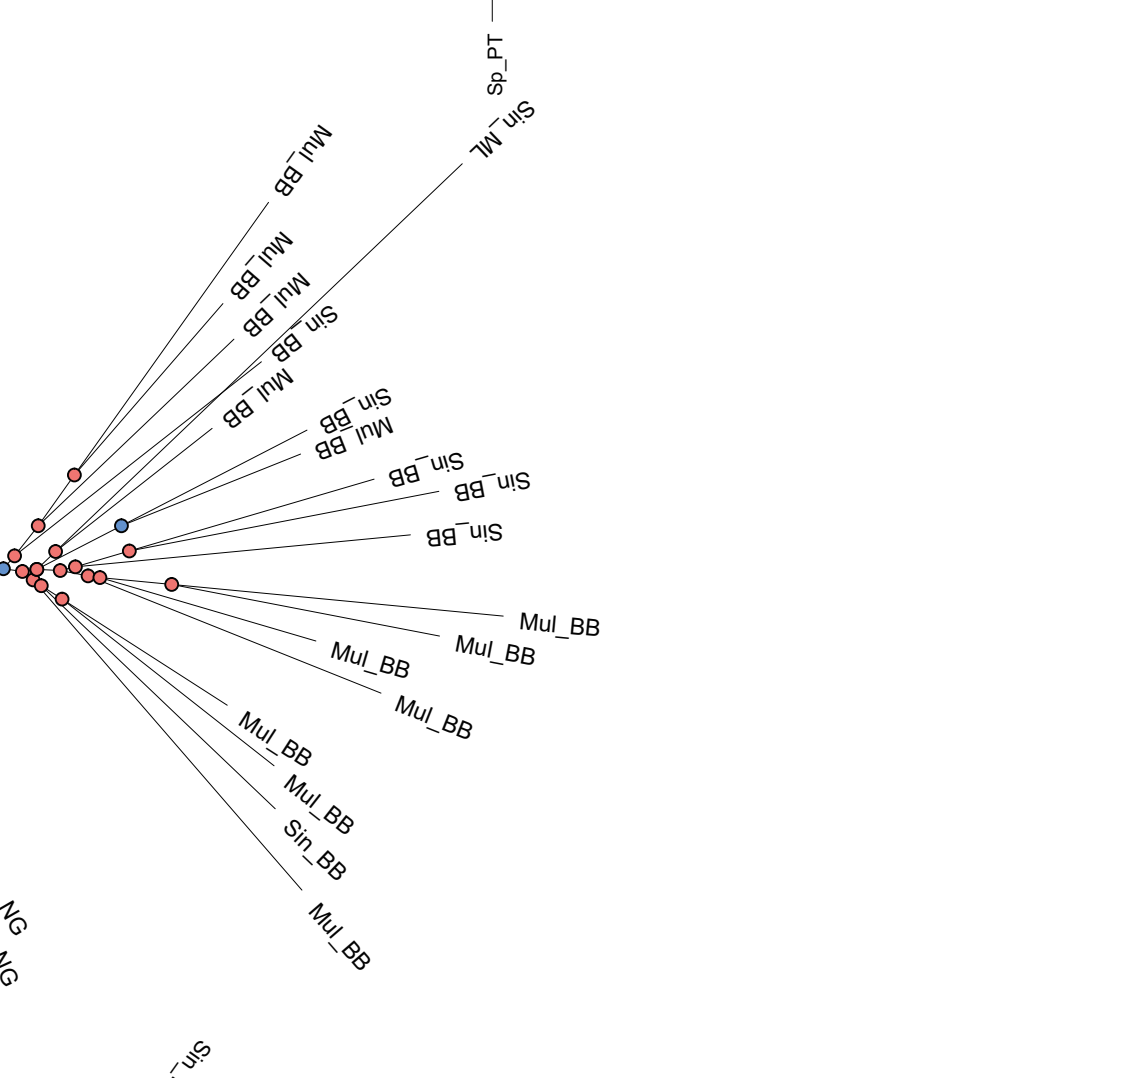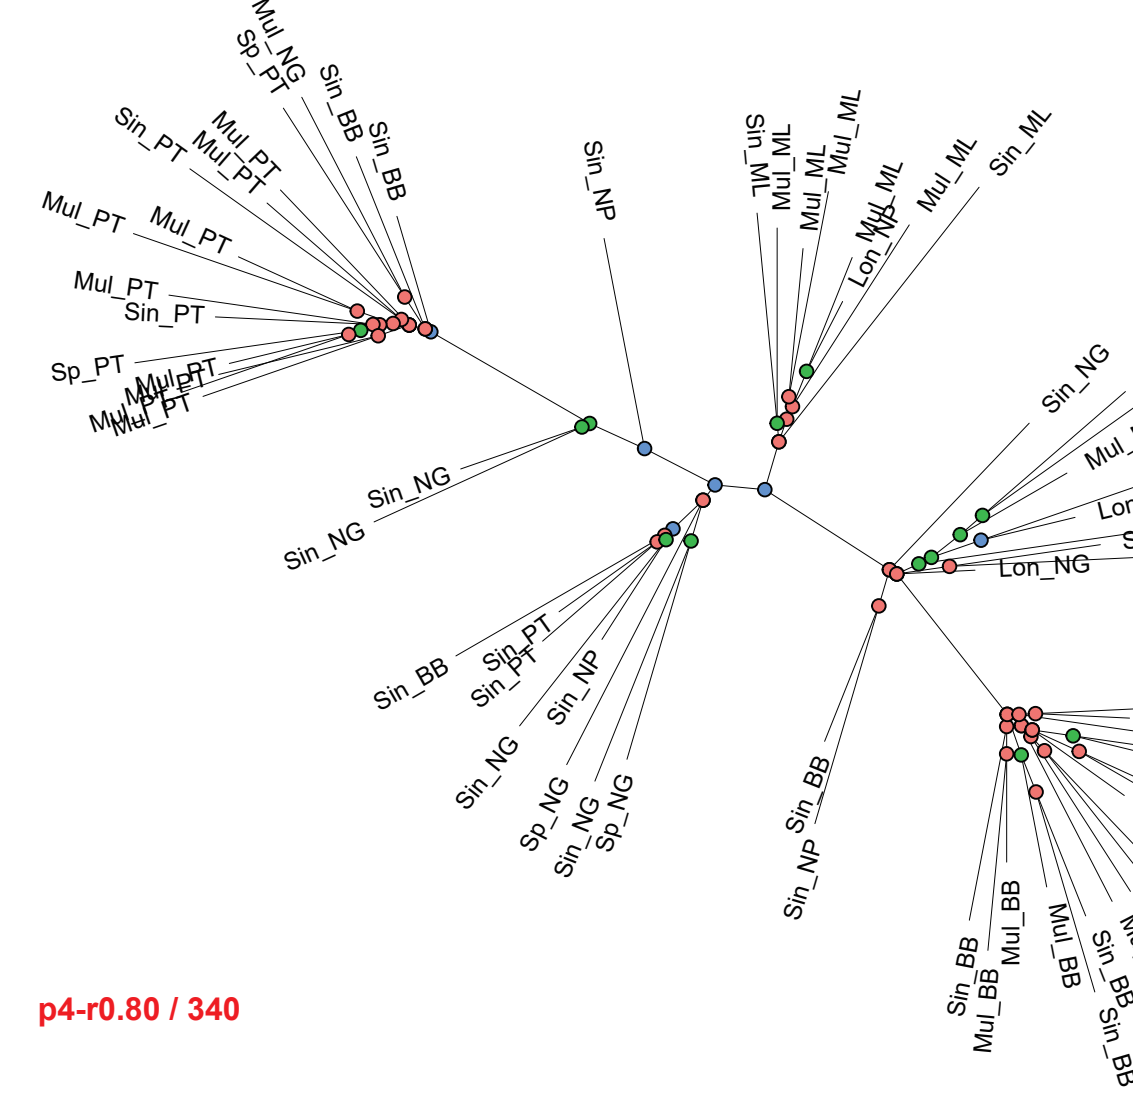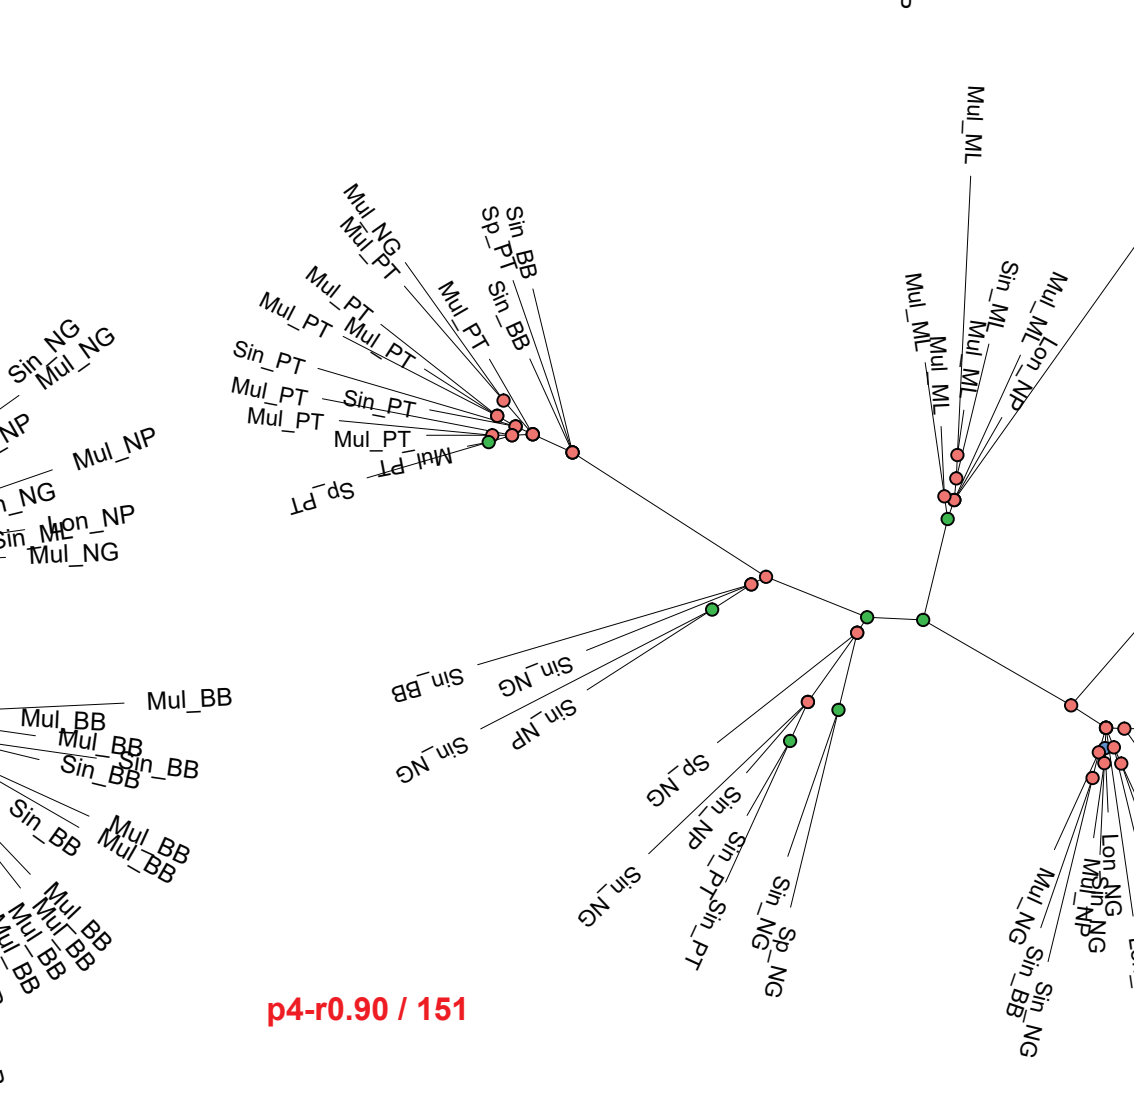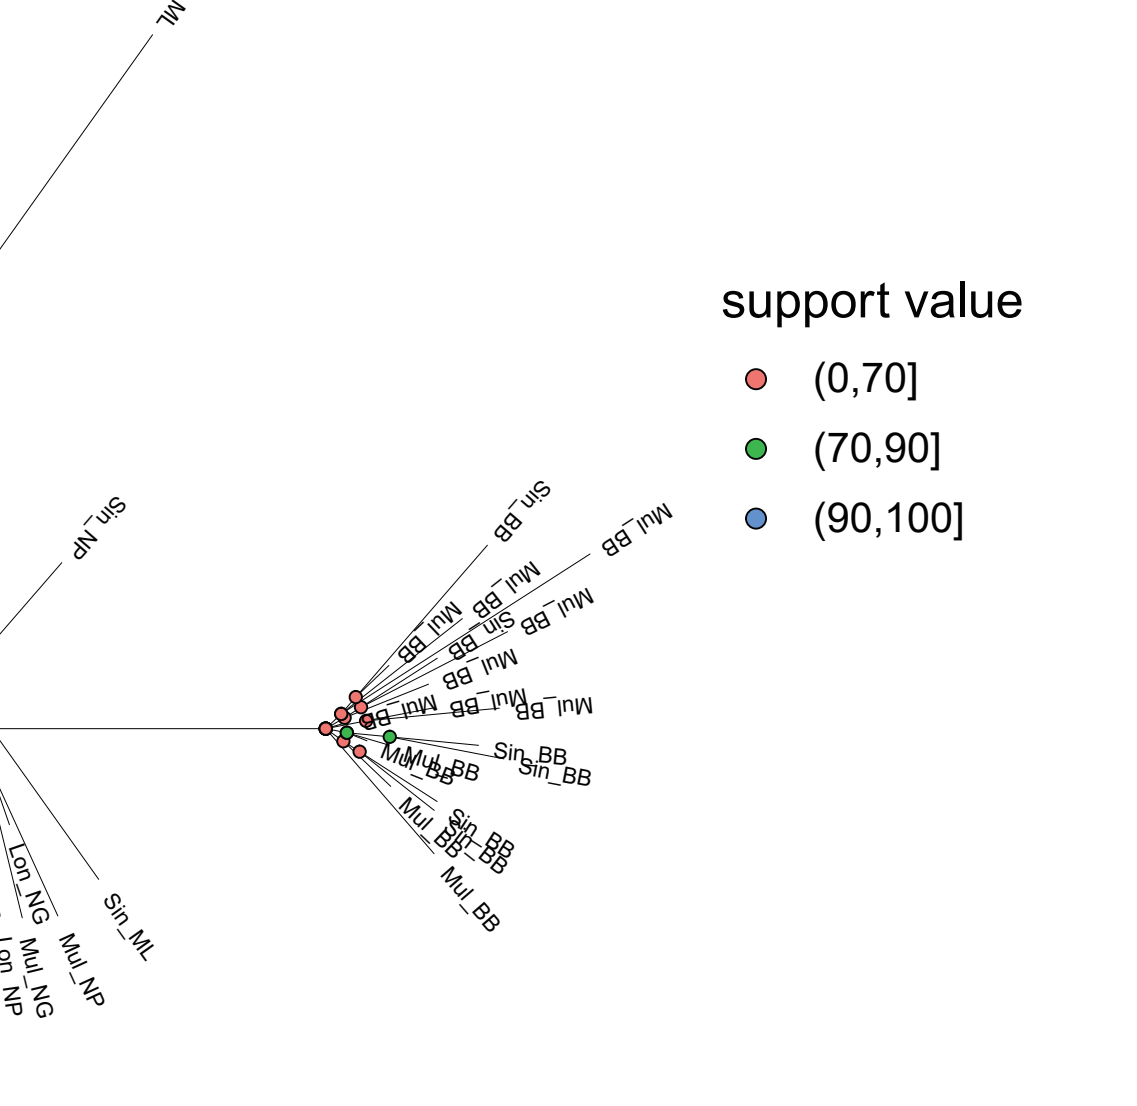



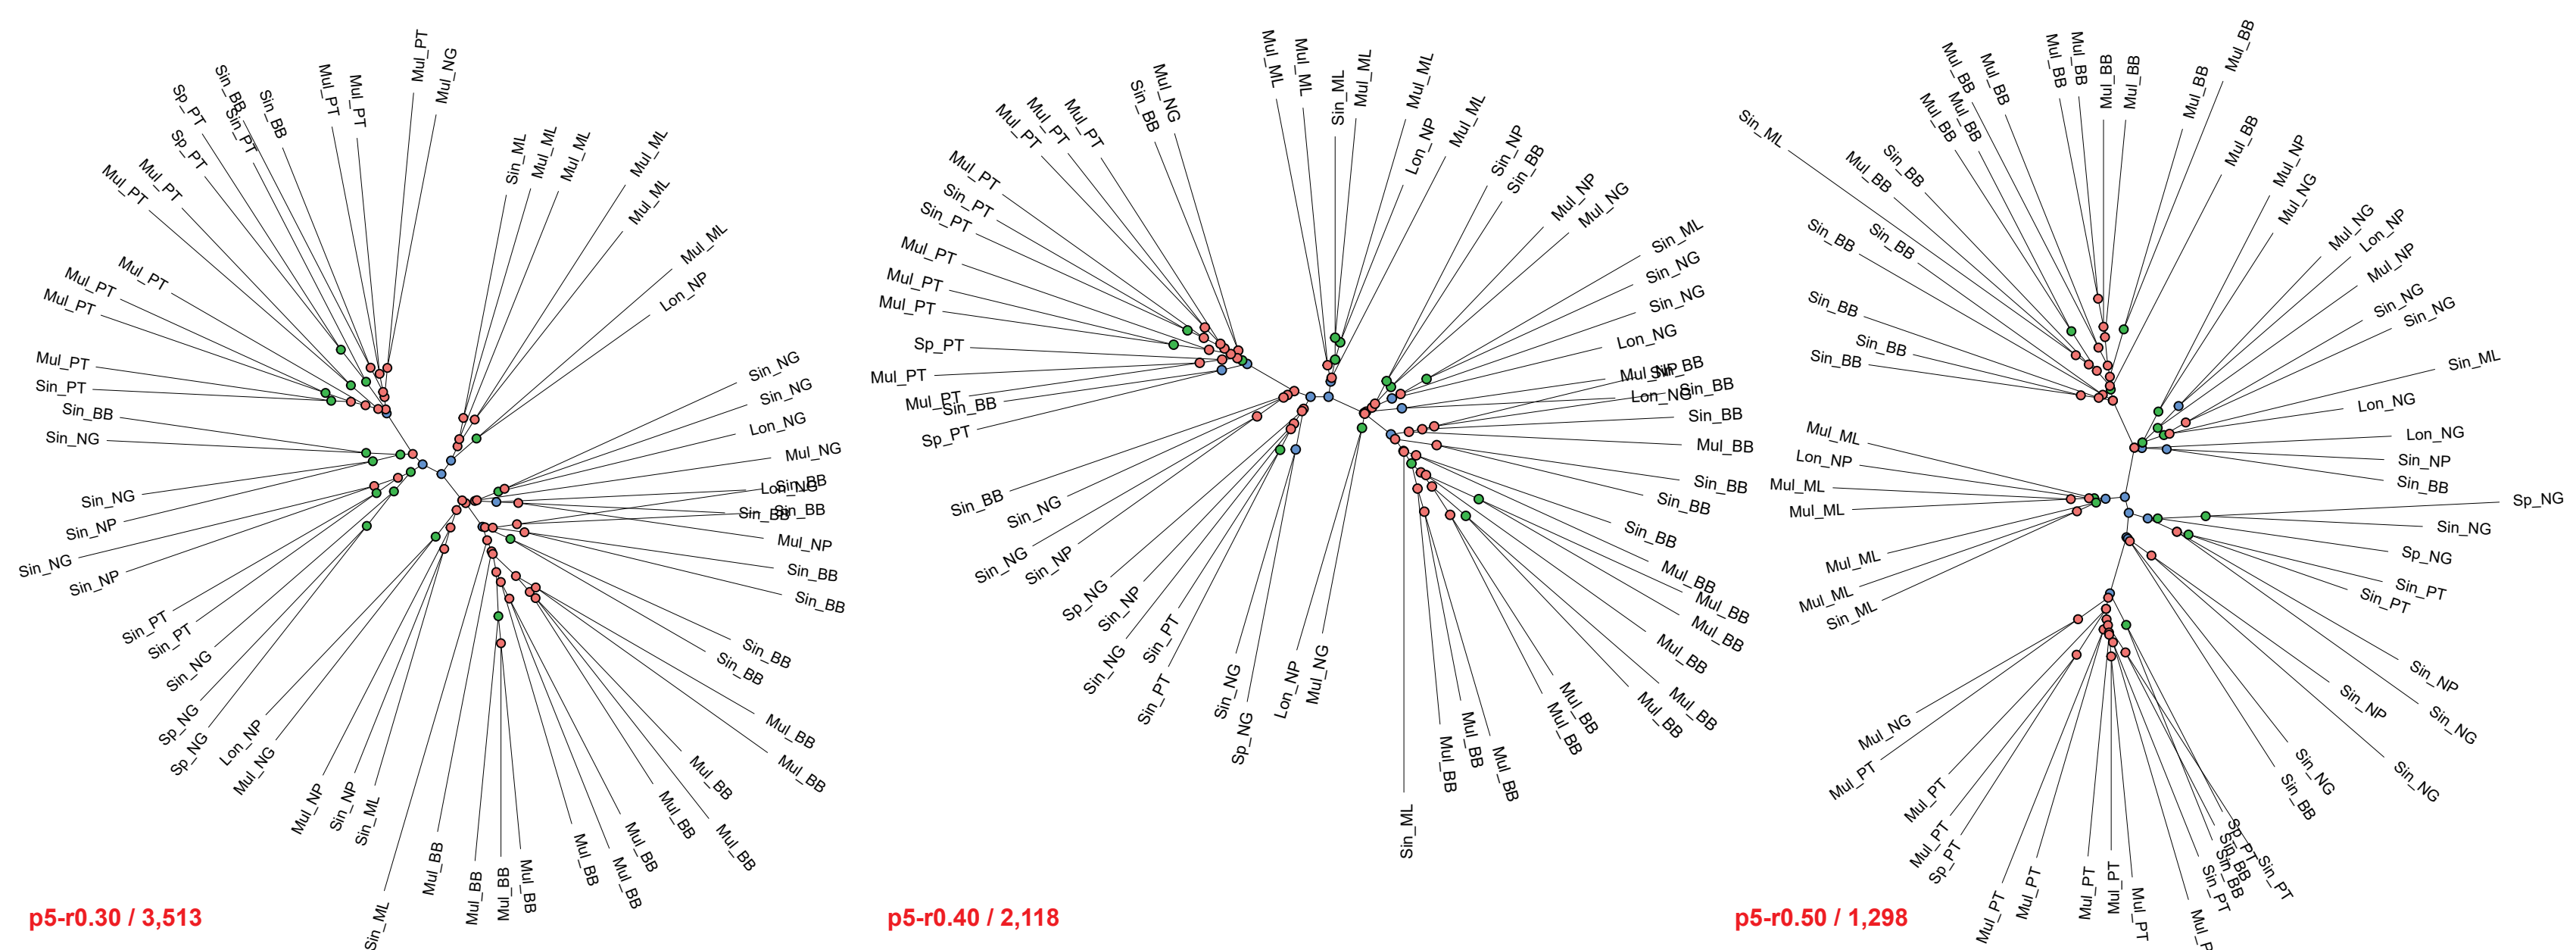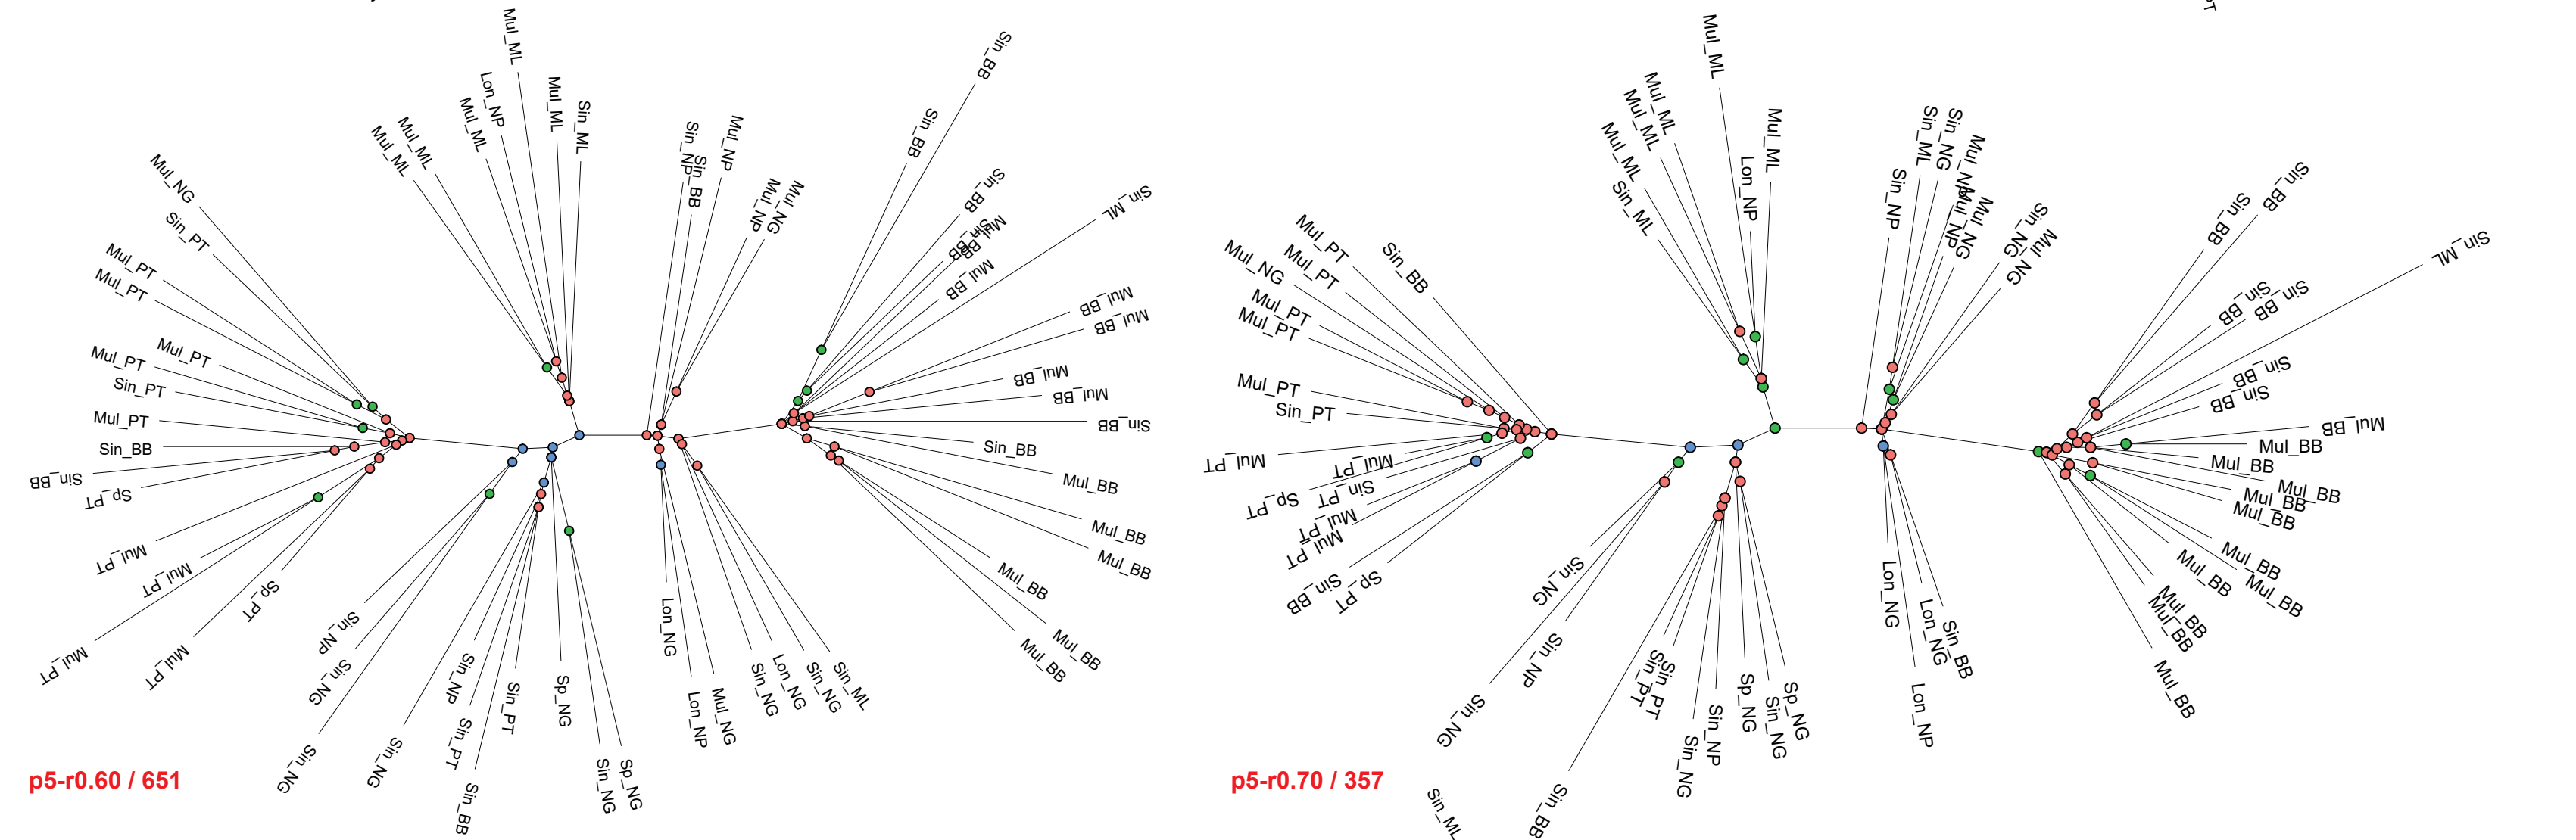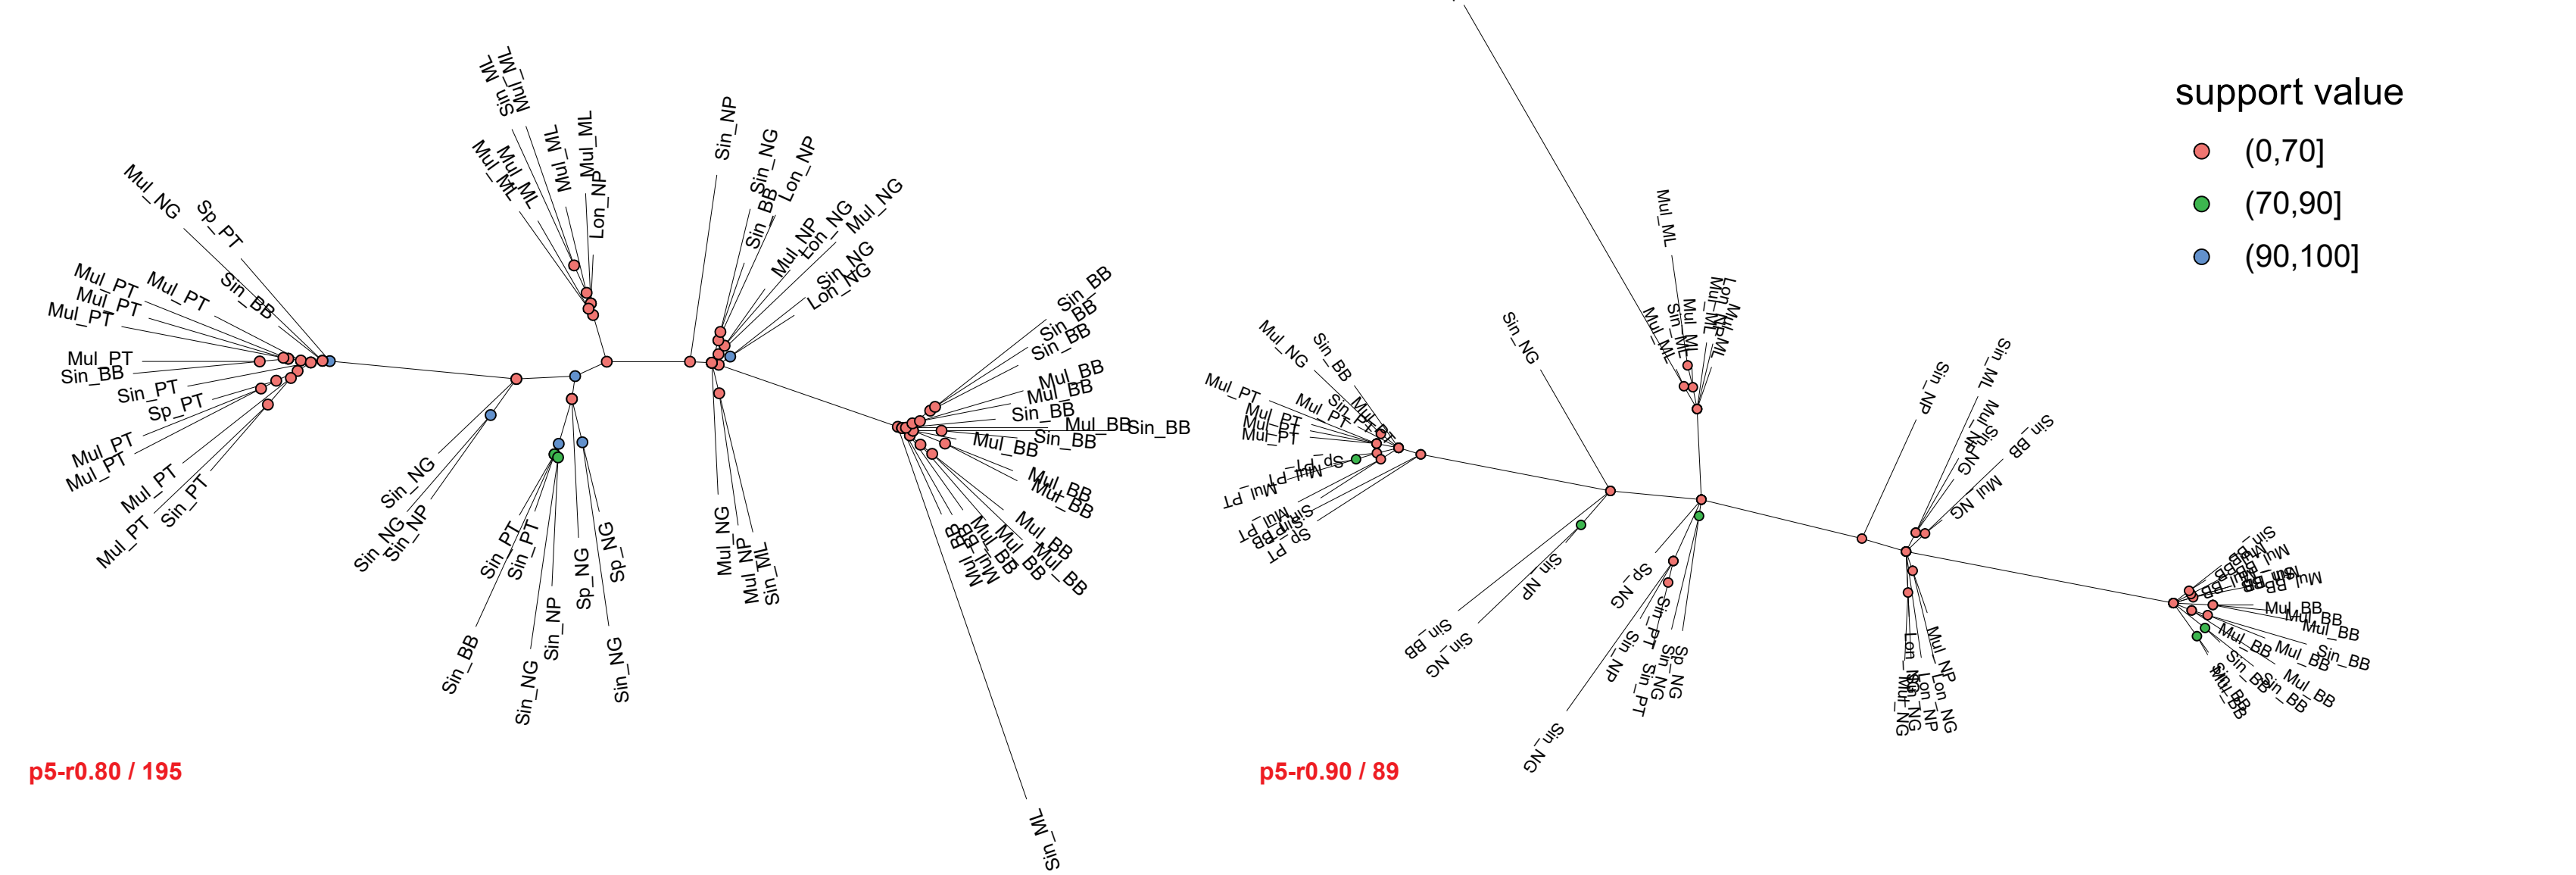

support value

- (0,70]
- (70,90]
- (90,100]

Supplement: Supplementary file 3 [file supplementary]
